# Supplementary material for: Cell Surface Profiling Using High-Throughput Flow Cytometry: A Platform for Biomarker Discovery and Analysis of Cellular Heterogeneity
Source: PubMed Central journal article supplement (PMC4149490; doi:10.1371/journal.pone.0105602), 2014-08-29
Supplement: pone.0105602.s002.pdf [file pone.0105602.s002.pdf]

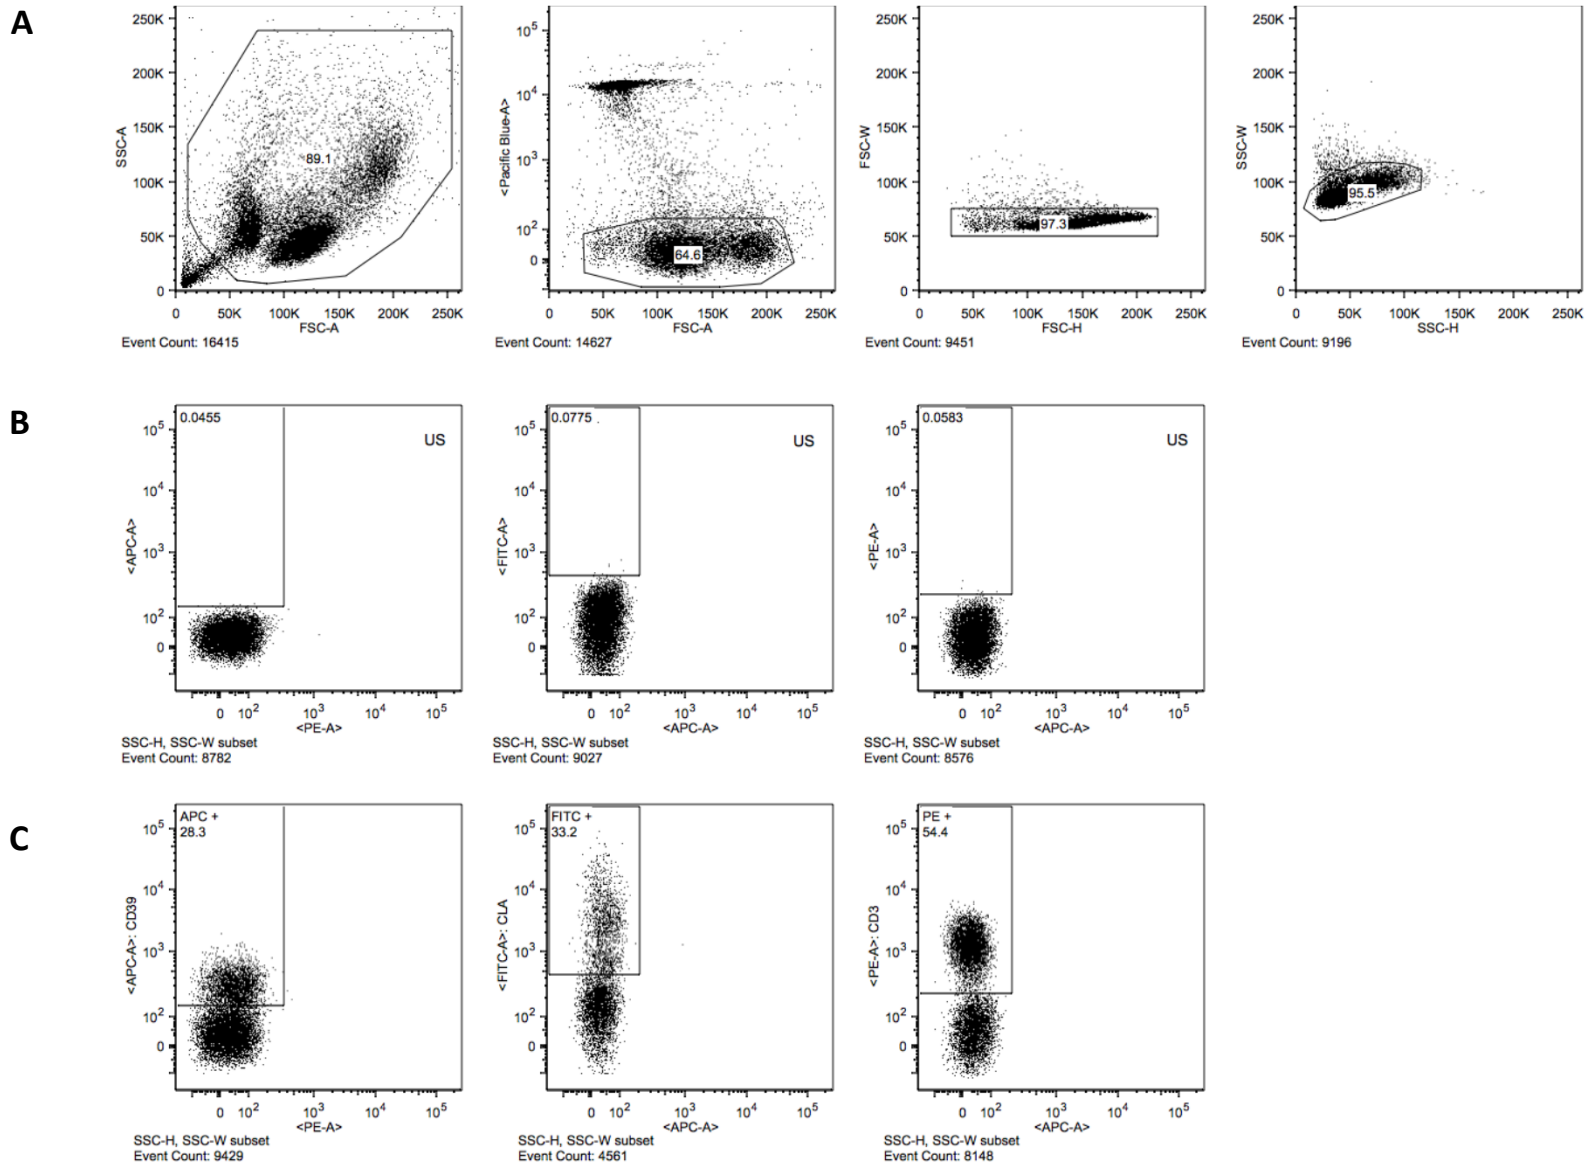

**Figure S2. Gating strategy for HT-FC analysis of PBMCs.** (A) Cells were gated on forward scatter (FSC) vs. side scatter (SCC) to exclude debris and then on DAPI-negative viable cells, and doublets were excluded using FSC and SSC height-vs.-width plots. (B) Fluorescence-minus-one controls for each of the three fluorochromes in the HT-FC panel are shown. (C) Examples of positively expressed markers for each of the three fluorochromes used are shown.
