# Supplementary material for: Cell Surface Profiling Using High-Throughput Flow Cytometry: A Platform for Biomarker Discovery and Analysis of Cellular Heterogeneity
Source: PubMed Central journal article supplement (PMC4149490; doi:10.1371/journal.pone.0105602), 2014-08-29
Supplement: pone.0105602.s005.pdf [file pone.0105602.s005.pdf]

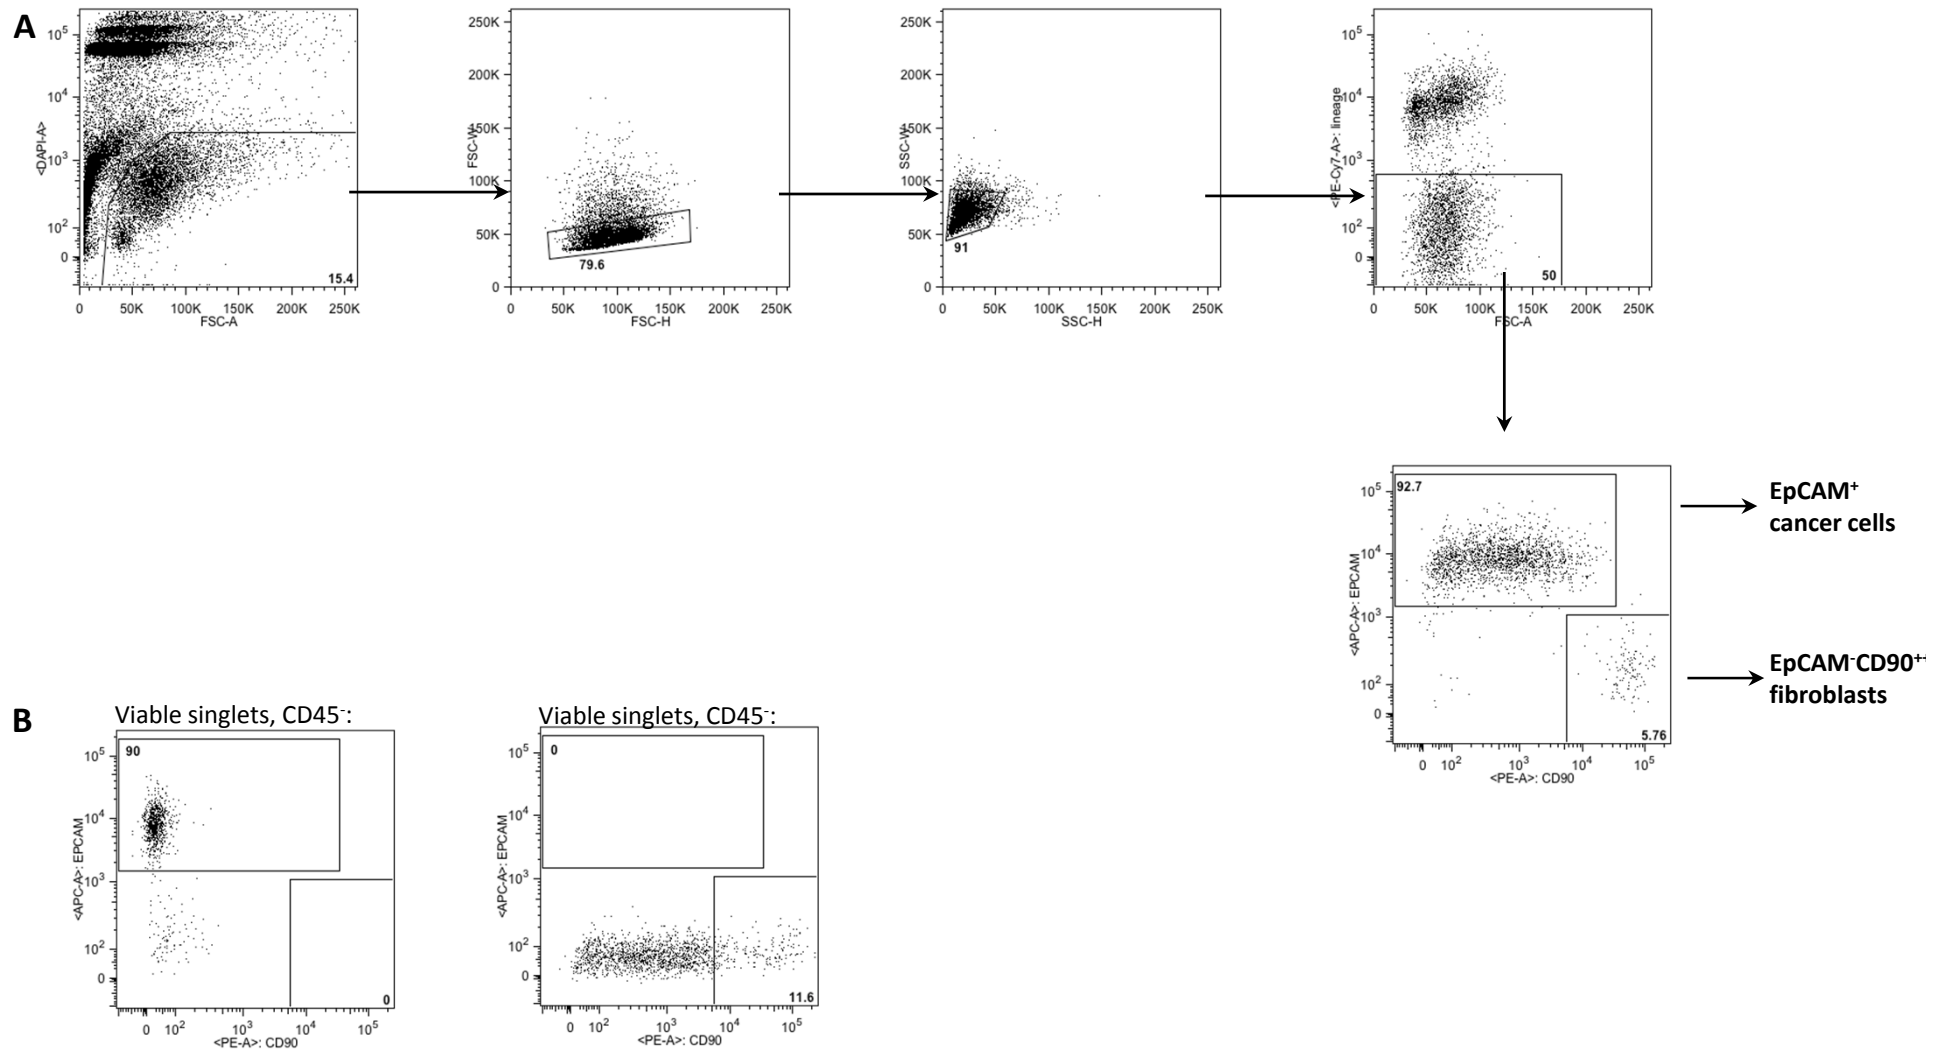

**Figure S5. Gating strategy for FACS isolation of cancer-associated fibroblasts from primary serous ovarian cancer samples.** (A) Cells were gated on DAPI-negative viable cells and doublets were excluded using FSC and SSC height-vs.-width plots. CD45<sup>+</sup>/CD31<sup>+</sup> “lineage positive” immune and vascular endothelial cells were excluded, and cells were further gated for EpCAM<sup>+</sup> cancer cells, and EpCAM<sup>-</sup>CD90<sup>+</sup> fibroblasts. (B) fluorescence-minus-one controls for CD90-PE (left) and EpCAM-APC (right) are shown, with the same gates applied as in (A).
