# Supplementary material for: Cell Surface Profiling Using High-Throughput Flow Cytometry: A Platform for Biomarker Discovery and Analysis of Cellular Heterogeneity
Source: PubMed Central journal article supplement (PMC4149490; doi:10.1371/journal.pone.0105602), 2014-08-29
Supplement: pone.0105602.s006.pdf [file pone.0105602.s006.pdf]

**Table S1. Antibodies included in HT-FC panel.**

| Antigen | Isotype        | NCBI Gene Name | Entrez Gene ID | Supplier        | Clone       | Note |
|---------|----------------|----------------|----------------|-----------------|-------------|------|
| BLTR-1  | Mouse IgG1     | LTB4R          | 1241           | BD Biosciences  | 203/14F11   |      |
| CA9     | Mouse IgG2a    | CA9            | 768            | R&D Systems     | 303123      |      |
| CD10    | Mouse IgG1, κ  | MME            | 4311           | BD Biosciences  | HI10a       |      |
| CD100   | Mouse IgM      | SEMA4D         | 10507          | e-Bioscience    | 133-1C6     |      |
| CD101   | Mouse IgG1     | IGSF2          | 9398           | e-Bioscience    | BB27        |      |
| CD102   | Mouse IgG2a, κ | ICAM2          | 3384           | BD Biosciences  | CBR-1C2/2.1 |      |
| CD103   | Mouse IgG1, κ  | ITGAE          | 3682           | BD Biosciences  | Ber-ACT8    |      |
| CD104   | Rat IgG2b, κ   | ITGB4          | 3691           | BD Biosciences  | 439-9B      |      |
| CD105   | Mouse IgG1     | ENG            | 2022           | e-Bioscience    | SN6         |      |
| CD106   | Mouse IgG1, κ  | VCAM1          | 7412           | BD Biosciences  | 51-10C9     |      |
| CD107a  | Mouse IgG1, κ  | LAMP1          | 3916           | BD Biosciences  | H4A3        |      |
| CD107b  | Mouse IgG1, κ  | LAMP2          | 3920           | BD Biosciences  | H4B4        |      |
| CD108   | Mouse IgG2a, κ | SEMA7A         | 8482           | BD Biosciences  | KS-2        |      |
| CD109   | Mouse IgG1, κ  | CD109          | 135228         | BD Biosciences  | TEA 2/16    |      |
| CD110   | Mouse IgG2b, κ | MPL            | 4352           | BD Biosciences  | 1.6.1       |      |
| CD111   | Mouse IgG1, κ  | PVRL1          | 5818           | BioLegend       | R1.302      |      |
| CD112   | Mouse IgG1, κ  | PVRL2          | 5819           | BD Biosciences  | R2.525      |      |
| CD114   | Mouse IgG1, κ  | CSF3R          | 1441           | BD Biosciences  | LMM741      |      |
| CD115   | Mouse IgG1     | CSF1R          | 1436           | R&D Systems     | 61708       |      |
| CD116   | Mouse IgG1, κ  | CSF2RA         | 1438           | BD Biosciences  | hGMCSFR-M1  |      |
| CD117   | Mouse IgG1, κ  | KIT            | 3815           | BD Biosciences  | YB5.B8      |      |
| CD118   | Mouse IgG1     | LIFR           | 3977           | R&D Systems     | 32953       |      |
| CD119   | Mouse IgG1, κ  | IFNGR1         | 3459           | BD Biosciences  | GIR-208     |      |
| CD11a   | Mouse IgG1, κ  | ITGAL          | 3683           | BD Biosciences  | HI111       |      |
| CD11b   | Mouse IgG1, κ  | ITGAM          | 3684           | BD Biosciences  | ICRF44      |      |
| CD11c   | Mouse IgG1, κ  | ITGAX          | 3687           | BD Biosciences  | B-ly6       |      |
| CD120a  | Mouse IgG1     | TNFRSF1A       | 7132           | R&D Systems     | 16803       |      |
| CD120b  | Rat IgG2b, κ   | TNFRSF1B       | 7133           | BD Biosciences  | hTNFR-M1    |      |
| CD121b  | Mouse IgG1     | IL1R2          | 7850           | R&D Systems     | 34141       |      |
| CD122   | Mouse IgG1, κ  | IL2RB          | 3560           | BD Biosciences  | Mik-β3      |      |
| CD123   | Mouse IgG2a, κ | IL3RA          | 3563           | BD Biosciences  | 7G3         |      |
| CD124   | Mouse IgG1, κ  | IL4R           | 3566           | BD Biosciences  | hIL4R-M57   |      |
| CD125   | Mouse IgG1     | IL5RA          | 3568           | R&D Systems     | 26815       |      |
| CD126   | Mouse IgG1, κ  | IL6R           | 3570           | BD Biosciences  | M5          |      |
| CD127   | Mouse IgG1, κ  | IL7R           | 3575           | BD Biosciences  | hIL-7R-M21  |      |
| CD129   | Mouse IgG2b, κ | IL9R           | 3581           | BioLegend       | AH9R7       |      |
| CD13    | Mouse IgG1, κ  | ANPEP          | 290            | BD Biosciences  | WM15        |      |
| CD130   | Mouse IgG1, κ  | IL6ST          | 3572           | BD Biosciences  | AM64        |      |
| CD131   | Mouse IgG1, κ  | CSF2RB         | 1439           | e-Bioscience    | 1C1         |      |
| CD132   | Mouse IgG1, κ  | IL2RG          | 3561           | BD Biosciences  | AG184       |      |
| CD133   | Mouse IgG1, κ  | PROM1          | 8842           | Miltenyi        | AC133       |      |
| CD134   | Mouse IgG1, κ  | TNFRSF4        | 7293           | BD Biosciences  | ACT35       |      |
| CD135   | Mouse IgG1, κ  | FLT3           | 2322           | BD Biosciences  | 4G8         |      |
| CD136   | not given      | MST1R          | 4486           | Beckman Coulter | ID1         |      |
| CD137   | Mouse IgG1, κ  | TNFRSF9        | 3604           | BD Biosciences  | 4B4-1       |      |
| CD137L  | Mouse IgG1, κ  | TNFSF9         | 8744           | BioLegend       | 5F4         |      |
| CD138   | Mouse IgG1, κ  | SDC1           | 6382           | BD Biosciences  | M15         |      |
| CD14    | Mouse IgG2a, κ | CD14           | 929            | BD Biosciences  | M5E2        |      |
| CD140a  | Mouse IgG2a, κ | PDGFRA         | 5156           | BD Biosciences  | αR1         |      |
| CD140b  | Mouse IgG2a, κ | PDGFRB         | 5159           | BD Biosciences  | 28D4        |      |
| CD141   | Mouse IgG1, κ  | THBD           | 7056           | BD Biosciences  | 1A4         |      |
| CD142   | Mouse IgG1, κ  | F3             | 2152           | BD Biosciences  | HTF-1       |      |
| CD143   | Mouse IgG1     | ACE            | 1636           | R&D Systems     | 171417      |      |
| CD144   | Mouse IgG1, κ  | CDH5           | 1003           | BD Biosciences  | 55-7H1      |      |
| CD146   | Mouse IgG1, κ  | MCAM           | 4162           | BD Biosciences  | P1H12       |      |
| CD147   | Mouse IgG1, κ  | BSG            | 682            | BD Biosciences  | HIM6        |      |
| CD148   | Mouse IgG1     | PTPRJ          | 5795           | R&D Systems     | 143-41      |      |
| CD15    | Mouse IgM, κ   | FUT4           | 2526           | BD Biosciences  | HI98        |      |
| CD150   | Mouse IgG1, κ  | SLAMF1         | 6504           | BD Biosciences  | A12         |      |
| CD151   | Mouse IgG1, κ  | CD151          | 977            | BD Biosciences  | 14A2.H1     |      |
| CD152   | Mouse IgG2a, κ | CTLA4          | 1493           | BD Biosciences  | BNI3        |      |
| CD153   | Mouse IgG2B    | TNFSF8         | 944            | R&D Systems     | 116614      |      |
| CD154   | Mouse IgG1, κ  | CD40LG         | 959            | BD Biosciences  | TRAP1       |      |
| CD155   | Mouse IgG1     | PVR            | 5817           | e-Bioscience    | 2H7CD155    |      |

**Supplementary Table 1. Antibodies included in HT-FC panel, continued.**

| Antigen | Isotype        | NCBI Gene Name | Entrez Gene ID | Supplier           | Clone        | Note             |
|---------|----------------|----------------|----------------|--------------------|--------------|------------------|
| CD156b  | Mouse IgG1     | ADAM17         | 6868           | R&D Systems        | 111633       |                  |
| CD157   | Mouse IgG1, k  | BST1           | 683            | MBL                | RF3          |                  |
| CD158A  | Mouse IgM, k   | KIR2DL1        | 3802           | BD Biosciences     | HP-3E4       |                  |
| CD158B1 | Mouse IgG2b, k | KIR2DL2        | 3803           | BD Biosciences     | CH-L         |                  |
| CD158B2 | Mouse IgG2a, k | KIR2DL3        | 3804           | BD Biosciences     | DX27         |                  |
| CD158D  | Mouse IgG2a    | KIR2DL4        | 3805           | R&D Systems        | 181703       |                  |
| CD158E2 | Mouse IgG1, k  | KIR3DS1        | 3813           | BD Biosciences     | DX9          |                  |
| CD158F  | Mouse IgG1     | KIR2DL5A       | 57292          | BioLegend          | UP-R1        |                  |
| CD158I  | Mouse IgG1     | KIR2DS4        | 3809           | Mitenyi            | JJC11.6      |                  |
| CD159a  | Mouse IgG2a    | KLRC1          | 3821           | R&D Systems        | 131411       |                  |
| CD159c  | Mouse IgG1     | KLRC2          | 3822           | R&D Systems        | 134591       |                  |
| CD16    | Mouse IgG1, k  | FCGR3A         | 2214           | BD Biosciences     | 3G8          |                  |
| CD160   | Mouse IgM, k   | CD160          | 11126          | BioLegend          | BY55         |                  |
| CD161   | Mouse IgG1, k  | KLRB1          | 3820           | BD Biosciences     | DX12         |                  |
| CD162   | Mouse IgG1, k  | SELPLG         | 6404           | BD Biosciences     | KPL-1        |                  |
| CD163   | Mouse IgG1, k  | CD163          | 9332           | BD Biosciences     | GHW61        |                  |
| CD164   | Mouse IgG2a, k | CD164          | 8763           | BD Biosciences     | N6B6         |                  |
| CD165   | Mouse IgG1     | CD165          | 23449          | e-Bioscience       | SN2 N56-D11  |                  |
| CD166   | Mouse IgG1, k  | ALCAM          | 214            | BD Biosciences     | 3A6          |                  |
| CD167a  | Mouse IgM, k   | DDR1           | 780            | BioLegend          | 51D6         |                  |
| CD169   | Mouse IgG1     | SIGLEC1        | 6614           | BioLegend          | 7-239        |                  |
| CD16b   | Mouse IgG2a, k | FCGR3B         | 2215           | BD Biosciences     | CLB-gran11.5 |                  |
| CD17    | Mouse IgM      | N/A            | N/A            | Lifespan Bioscienc | Not given    | Lactosylceramide |
| CD170   | Mouse IgG1     | SIGLEC5        | 8778           | R&D Systems        | 194128       |                  |
| CD171   | Mouse IgG2a    | L1CAM          | 3897           | e-Bioscience       | 5G3          |                  |
| CD172a  | Mouse IgG1, k  | SIRPA          | 140885         | BioLegend          | SE5A5        |                  |
| CD172b  | Mouse IgG1, k  | SIRPB1         | 10326          | BD Biosciences     | B4B6         |                  |
| CD172g  | Mouse IgG1, k  | SIRPG          | 55423          | BioLegend          | LSB2.20      |                  |
| CD175s  | Mouse IgG1     | N/A            | N/A            | Abcam              | STn 219      | Sialyl-Tn        |
| CD177   | Mouse IgG1     | CD177          | 57126          | Abcam              | MEM-166      |                  |
| CD178   | Mouse IgG1, k  | FASLG          | 356            | BioLegend          | NOK-1        |                  |
| CD179a  | Mouse IgG1, k  | VPREB1         | 7441           | BioLegend          | HSL96        |                  |
| CD18    | Mouse IgG1, k  | ITGB2          | 3689           | BD Biosciences     | 6.7          |                  |
| CD180   | Mouse IgG1, k  | CD180          | 4064           | BD Biosciences     | G28-8        |                  |
| CD181   | Mouse IgG2b, k | IL8RA          | 3577           | BD Biosciences     | 5A12         |                  |
| CD182   | Mouse IgG1, k  | IL8RB          | 3579           | BD Biosciences     | 6C6          |                  |
| CD183   | Mouse IgG1, k  | CXCR3          | 2833           | BD Biosciences     | 1C6/CXCR3    |                  |
| CD184   | Mouse IgG2a, k | CXCR4          | 7852           | BD Biosciences     | 12G5         |                  |
| CD185   | Mouse IgG2b, k | BLR1           | 643            | BD Biosciences     | RF8B2        |                  |
| CD186   | Mouse IgG2b, k | CXCR6          | 10663          | R&D Systems        | 56811        |                  |
| CD19    | Mouse IgG1, k  | CD19           | 930            | BD Biosciences     | HIB19        |                  |
| CD191   | Mouse IgG2b    | CCR1           | 1230           | R&D Systems        | 53504        |                  |
| CD192   | Mouse IgG2b, k | CCR2           | 729230         | BD Biosciences     | 48607        |                  |
| CD193   | Mouse IgG2b, k | CCR3           | 1232           | BD Biosciences     | 5E8          |                  |
| CD194   | Mouse IgG2b, k | CCR4           | 1233           | BioLegend          | TG6/CCR4     |                  |
| CD195   | Mouse IgG2a, k | CCR5           | 1234           | BD Biosciences     | 3A9          |                  |
| CD196   | Mouse IgG1, k  | CCR6           | 1235           | BD Biosciences     | 11A9         |                  |
| CD197   | Rat IgG2a, k   | CCR7           | 1236           | BD Biosciences     | 3D12         |                  |
| CD1a    | Mouse IgG1, k  | CD1A           | 909            | BD Biosciences     | HI149        |                  |
| CD1b    | Mouse IgG1, k  | CD1B           | 910            | BD Biosciences     | M-T101       |                  |
| CD1c    | Mouse IgG1, k  | CD1C           | 911            | BioLegend          | L161         |                  |
| CD1d    | Mouse IgG1, k  | CD1D           | 912            | BD Biosciences     | CD1d42       |                  |
| CD2     | Mouse IgG1, k  | CD2            | 914            | BD Biosciences     | RPA-2.10     |                  |
| CD20    | Mouse IgG2b, k | MS4A1          | 931            | BD Biosciences     | 2H7          |                  |
| CD200   | Mouse IgG1, k  | CD200          | 4345           | BD Biosciences     | MRC OX-104   |                  |
| CD201   | Rat IgG1, k    | PROCR          | 10544          | BD Biosciences     | RCR-252      |                  |
| CD202b  | Mouse IgG1, k  | TEK            | 7010           | BioLegend          | 33.1 (Ab33)  |                  |
| CD203c  | Mouse IgG1, k  | ENPP3          | 5169           | BioLegend          | NP4D6        |                  |
| CD204   | Mouse IgG2B    | MSR1           | 4481           | R&D Systems        | 351615       |                  |
| CD205   | Mouse IgG2b, k | LY75           | 4065           | BD Biosciences     | MG38         |                  |
| CD206   | Mouse IgG1, k  | MRC1           | 4360           | BD Biosciences     | 19.2         |                  |
| CD207   | Mouse IgG1     | CD207          | 50489          | R&D Systems        | 343828       |                  |
| CD208   | Mouse IgG1, k  | LAMP3          | 27074          | BD Biosciences     | I10-1112     |                  |
| CD209   | Mouse IgG2b, k | CD209          | 30835          | BD Biosciences     | DCN46        |                  |
| CD21    | Mouse IgG1, k  | CR2            | 1380           | BD Biosciences     | B-ly4        |                  |

**Supplementary Table 1. Antibodies included in HT-FC panel, continued.**

| Antigen    | Isotype        | NCBI Gene Name | Entrez Gene ID | Supplier           | Clone          | Note       |
|------------|----------------|----------------|----------------|--------------------|----------------|------------|
| CD212      | Mouse IgG1, κ  | IL12RB1        | 3594           | BD Biosciences     | 2.4e6          |            |
| CD213a2    | Mouse IgG1     | IL13RA2        | 3598           | Abcam              | B-D13          |            |
| CD215      | Mouse IgG2B    | IL15RA         | 3601           | R&D Systems        | 151303         |            |
| CD217      | Mouse IgG1     | IL17RA         | 23765          | bioLegend          | BG/hIL17AR     |            |
| CD218b     | Mouse IgG2b    | IL18RAP        | 8807           | R&D Systems        | 132029         |            |
| CD22       | Mouse IgG2b, κ | CD22           | 933            | BD Biosciences     | S-HCL-1        |            |
| CD220      | Goat IgG       | INSR           | 3643           | R&D Systems        |                | Polyclonal |
| CD221      | Mouse IgG1, κ  | IGF1R          | 3480           | BD Biosciences     | 1H7            |            |
| CD222      | Mouse IgG1, κ  | IGF2R          | 3482           | BioLegend          | MEM-238        |            |
| CD223      | Goat IgG       | LAG3           | 3902           | R&D Systems        | not given      |            |
| CD226      | Mouse IgG1, κ  | CD226          | 10666          | BD Biosciences     | DX11           |            |
| CD227      | Mouse IgG1, κ  | MUC1           | 4582           | BD Biosciences     | HMPV           |            |
| CD229      | Mouse IgG2a    | LY9            | 4063           | R&D Systems        | 249936         |            |
| CD23       | Mouse IgG1, κ  | FCER2          | 2208           | BD Biosciences     | M-L233         |            |
| CD230      | Mouse IgG1, κ  | PRNP           | 5621           | e-Bioscience       | 4D5            |            |
| CD231      | Mouse IgG1, κ  | TSPAN7         | 7102           | BioLegend          | SN1a (M3-3D9)  |            |
| CD234      | Mouse IgG2A    | DARC           | 2532           | R&D Systems        | 358307         |            |
| CD235a     | Mouse IgG2b, κ | GYPA           | 2993           | BD Biosciences     | GA-R2 (HIR2)   |            |
| CD24       | Mouse IgG2a, κ | CD24           | 100133941      | BD Biosciences     | ML5            |            |
| CD243 (BC) | Mouse IgG2a    | ABCB1          | 5243           | Beckman Coulter    | UIC2           |            |
| CD243 (BD) | Mouse IgG2b, κ | ABCB1          | 5243           | BD Biosciences     | 17F9           |            |
| CD244      | Mouse IgG2a, κ | CD244          | 51744          | BD Biosciences     | 2-69           |            |
| CD245      | Mouse IgG1, κ  | NPAT           | 4863           | BioLegend          | DY12           |            |
| CD249      | Rat IgG1, κ    | ENPEP          | 2028           | Lifespan Bioscienc | not provided   |            |
| CD25       | Mouse IgG1, κ  | IL2RA          | 3559           | BD Biosciences     | M-A251         |            |
| CD252      | Mouse IgG1, κ  | TNFSF4         | 7292           | BD Biosciences     | Ik-1           |            |
| CD253      | Mouse IgG1     | TNFSF10        | 8743           | BD Biosciences     | RIK-2          |            |
| CD254      | Mouse IgG2b, κ | TNFSF11        | 8600           | BioLegend          | MIH24          |            |
| CD255      | Mouse IgG3     | TNFSF12        | 8742           | BD Biosciences     | CARL-1         |            |
| CD256      | Mouse IgG2a, κ | TNFSF13        | 8741           | BioLegend          | A3D8           |            |
| CD257      | Mouse IgG1, κ  | TNFSF13B       | 10673          | BioLegend          | T7-241         |            |
| CD258      | Mouse IgG1     | TNFSF14        | 8740           | R&D Systems        | 115520         |            |
| CD26       | Mouse IgG1, κ  | DPP4           | 1803           | BD Biosciences     | M-A261         |            |
| CD261      | Mouse IgG1     | TNFRSF10A      | 8797           | BioLegend          | DJR1           |            |
| CD262      | Mouse IgG2b    | TNFRSF10B      | 8795           | R&D Systems        | 71908          |            |
| CD263      | Mouse IgG1     | TNFRSF10C      | 8794           | R&D Systems        | 90906          |            |
| CD264      | Mouse IgG1     | TNFRSF10D      | 8793           | R&D Systems        | 104918         |            |
| CD267      | Rat IgG2a, κ   | TNFRSF13B      | 23495          | BD Biosciences     | 1A1-K21-M22    |            |
| CD268      | Mouse IgG1, κ  | TNFRSF13C      | 115650         | BD Biosciences     | 11C1           |            |
| CD269      | Goat IgG       | TNFRSF17       | 608            | R&D Systems        | Polyclonal     |            |
| CD27       | Mouse IgG1, κ  | CD27           | 939            | BD Biosciences     | M-T271         |            |
| CD270      | Mouse IgG1, κ  | TNFRSF14       | 8764           | BioLegend          | 122            |            |
| CD271      | Mouse IgG1, κ  | NGFR           | 4804           | BD Biosciences     | C40-1457       |            |
| CD272      | Mouse IgG1, κ  | BTLA           | 151888         | BD Biosciences     | J168-540.90.22 |            |
| CD273      | Mouse IgG1, κ  | PDCD1LG2       | 80380          | BD Biosciences     | MIH18          |            |
| CD274      | Mouse IgG1, κ  | CD274          | 29126          | BD Biosciences     | MIH1           |            |
| CD275      | Mouse IgG2b, κ | ICOSLG         | 23308          | BD Biosciences     | 2D3/B7-H2      |            |
| CD276      | Mouse IgG1, κ  | CD276          | 80381          | BioLegend          | DCN.70         |            |
| CD277      | Mouse IgG1     | BTN3A1         | 11119          | e-Bioscience       | BT3.1          |            |
| CD278      | Mouse IgG1     | ICOS           | 29851          | BD Biosciences     | DX29           |            |
| CD279      | Mouse IgG1, κ  | PDCD1          | 5133           | BD Biosciences     | MIH4           |            |
| CD28       | Mouse IgG1, κ  | CD28           | 940            | BD Biosciences     | CD28.2         |            |
| CD281      | Mouse IgG1, κ  | TLR1           | 7096           | BioLegend          | TLR1.136       |            |
| CD282      | Mouse IgG1, κ  | TLR2           | 7097           | BD Biosciences     | 11G7           |            |
| CD283      | Mouse IgG1, κ  | TLR3           | 7098           | e-Bioscience       | TLR3.7         |            |
| CD284      | Mouse IgG2a    | TLR4           | 7099           | R&D Systems        | 610015         |            |
| CD286      | Mouse IgG1, κ  | TLR6           | 10333          | BioLegend          | TLR6.127       |            |
| CD288      | Mouse IgG1     | TLR8           | 51311          | Abcam              | 44C143         |            |
| CD289      | Rat IgG2a, κ   | TLR9           | 54106          | BD Biosciences     | eB72-1665      |            |
| CD29       | Mouse IgG1, κ  | ITGB1          | 3688           | BD Biosciences     | MAR4           |            |
| CD290      | Mouse IgG1, κ  | TLR10          | 81793          | BioLegend          | 3C10C5         |            |
| CD292      | Goat IgG       | BMPR1A         | 657            | R&D Systems        | Polyclonal     |            |
| CD294      | Rat IgG2a, κ   | GPR44          | 11251          | BD Biosciences     | BM16           |            |
| CD295      | Mouse IgG2b    | LEPR           | 3953           | R&D Systems        | 52263          |            |
| CD298      | Mouse IgG2a    | ATP1B3         | 483            | BioLegend          | LNH-94         |            |

**Supplementary Table 1. Antibodies included in HT-FC panel, continued.**

| Antigen    | Isotype        | NCBI Gene Name | Entrez Gene ID | Supplier       | Clone       | Note                         |
|------------|----------------|----------------|----------------|----------------|-------------|------------------------------|
| CD299      | Mouse IgG2b    | CLEC4M         | 10332          | R&D Systems    | 120604      |                              |
| CD3        | Mouse IgG2a, κ | CD3E           | 916            | BD Biosciences | HIT3a       |                              |
| CD30       | Mouse IgG1, κ  | TNFRSF8        | 943            | BD Biosciences | BerH8       |                              |
| CD300a     | Mouse IgG1     | CD300A         | 11314          | Abcam          | MEM-260     |                              |
| CD300c     | Mouse IgG1, κ  | CD300C         | 10871          | BioLegend      | TX45        |                              |
| CD300e     | Mouse IgG1, κ  | CD300E         | 342510         | BioLegend      | UP-H2       |                              |
| CD301      | Mouse IgG1     | CLEC10A        | 10462          | Imgenex        | 125A10.03   |                              |
| CD303      | Mouse IgG1     | CLEC4C         | 170482         | Miltenyi       | AC144       |                              |
| CD304      | Mouse IgG1     | NRP1           | 8829           | Miltenyi       | AD5-17F6    |                              |
| CD305      | Mouse IgG1, κ  | LAIR1          | 3903           | BD Biosciences | DX26        |                              |
| CD307e     | Mouse IgG2a, κ | FCRL5          | 83416          | BioLegend      | 509f6       |                              |
| CD309      | Mouse IgG1     | KDR            | 3791           | R&D Systems    | 89106       |                              |
| CD31       | Mouse IgG1, κ  | PECAM1         | 5175           | BD Biosciences | WM59        |                              |
| CD312      | Mouse IgG1     | EMR2           | 30817          | AbD Serotech   | 2A1         |                              |
| CD314      | Mouse IgG1, κ  | KLRK1          | 22914          | BD Biosciences | 1D11        |                              |
| CD317      | Mouse IgG1, κ  | BST2           | 684            | BioLegend      | RS38E       |                              |
| CD318      | Mouse IgG2a    | CDCP1          | 64866          | R&D Systems    | 309121      |                              |
| CD319      | Mouse IgG2a    | SLAMF7         | 57823          | R&D Systems    | 235614      |                              |
| CD32       | Mouse IgG1, κ  | FCGR2A         | 2212           | BD Biosciences | 3D3         |                              |
| CD321      | Mouse IgG1, κ  | F11R           | 50848          | BD Biosciences | M.AB.F11    |                              |
| CD322      | Rat IgG2a      | JAM2           | 58494          | AbD Serotech   | CRAM-18 F26 |                              |
| CD324      | Mouse IgG2a, κ | CDH1           | 999            | BD Biosciences | 67A4        |                              |
| CD325      | Mouse IgG1, κ  | CDH2           | 1000           | e-Bioscience   | 8C11        |                              |
| CD326      | Mouse IgG1, κ  | TACSTD1        | 4072           | BD Biosciences | EBA-1       |                              |
| CD328      | Mouse IgG1, κ  | SIGLEC7        | 27036          | BD Biosciences | F023-420    |                              |
| CD33       | Mouse IgG1, κ  | CD33           | 945            | BD Biosciences | P67.6       |                              |
| CD332      | Mouse IgG1     | FGFR2          | 2263           | R&D Systems    | 98725       |                              |
| CD333      | Mouse IgG1     | FGFR3          | 2261           | R&D Systems    | 136334      |                              |
| CD334      | Mouse IgG1, κ  | FGFR4          | 2264           | BioLegend      | 4FR6D3      |                              |
| CD335      | Mouse IgG1, κ  | NCR1           | 9437           | BD Biosciences | 9E2/NKp46   |                              |
| CD336      | Mouse IgG1, κ  | NCR2           | 9436           | BD Biosciences | P44-8.1     |                              |
| CD337      | Mouse IgG1, κ  | NCR3           | 259197         | BD Biosciences | P30-15      |                              |
| CD338      | Mouse IgG2b, κ | ABCg2          | 9429           | BioLegend      | 5D3         |                              |
| CD339      | Mouse IgG2b    | JAG1           | 182            | R&D Systems    | 188331      |                              |
| CD34       | Mouse IgG1, κ  | CD34           | 947            | BD Biosciences | 581         |                              |
| CD340      | Mouse IgG1, κ  | ERBB2          | 2064           | BD Biosciences | Neu 24.7    |                              |
| CD344      | Mouse IgG1, κ  | FZD4           | 8322           | BioLegend      | CH3A4A7     |                              |
| CD349      | Mouse IgM, κ   | FZD9           | 8326           | BioLegend      | W3C4E11     |                              |
| CD35       | Mouse IgG1, κ  | CR1            | 1378           | BD Biosciences | E11         |                              |
| CD351      | Mouse IgG1, κ  | FCAMR          | 83953          | BioLegend      | TX61        |                              |
| CD352      | Mouse IgG1, κ  | SLAMF6         | 114836         | BioLegend      | NT-7        |                              |
| CD354      | Mouse IgG1, κ  | TREM1          | 54210          | BioLegend      | TREM-26     |                              |
| CD355      | Mouse IgG2a, κ | CRTAM          | 56253          | BioLegend      | Cr24.1      |                              |
| CD357      | Mouse IgG1, κ  | TNFRSF18       | 8784           | BioLegend      | 621         |                              |
| CD358/DR6  | Mouse IgG1     | TNFRSF21       | 27242          | Abcam          | DR-6-04-EC  |                              |
| CD36       | Mouse IgM, κ   | CD36           | 948            | BD Biosciences | CB38 (NL07) |                              |
| CD360 (BD) | Mouse IgG1, κ  | IL21R          | 50615          | BD Biosciences | 17A12       |                              |
| CD360 (BL) | Mouse IgG1, κ  | IL21R          | 50615          | BioLegend      | 2G1-K12     |                              |
| CD362      | Rat IgG2b      | SDC2           | 6383           | R&D Systems    | 305515      |                              |
| CD363      | Mouse IgG2b    | S1PR1          | 1901           | R&D Systems    | 218713      |                              |
| CD37       | Mouse IgG1, κ  | CD37           | 951            | BD Biosciences | M-B371      |                              |
| CD38       | Mouse IgG1, κ  | CD38           | 952            | BD Biosciences | HIT2        |                              |
| CD4        | Mouse IgG1, κ  | CD4            | 920            | BD Biosciences | RPA-T4      |                              |
| CD40       | Mouse IgG1, κ  | CD40           | 958            | BD Biosciences | 5C3         |                              |
| CD41a      | Mouse IgG1, κ  | ITGA2B/ITGB3   |                | BD Biosciences | HIP8        | Recognizes CD41/CD61 complex |
| CD41b      | Mouse IgG3, κ  | ITGA2B         | 3674           | BD Biosciences | HIP2        |                              |
| CD42a      | Mouse IgG1, κ  | GP9            | 2815           | BD Biosciences | ALMA.16     |                              |
| CD42b      | Mouse IgG1, κ  | GP1BA          | 2811           | BD Biosciences | HIP1        |                              |
| CD43       | Mouse IgG1, κ  | SPN            | 6693           | BD Biosciences | 1G10        |                              |
| CD44       | Mouse IgG2b, κ | CD44           | 960            | BD Biosciences | G44-26      |                              |
| CD45RA     | Mouse IgG2b, κ | PTPRC          | 5788           | BD Biosciences | H1100       |                              |
| CD45RB     | Mouse IgG1, κ  | PTPRC          | 5788           | BD Biosciences | MT4         |                              |
| CD45RO     | Mouse IgG2a, κ | PTPRC          | 5788           | BD Biosciences | UCHL1       |                              |
| CD46       | Mouse IgG2a, κ | CD46           | 4179           | BD Biosciences | E4.3        |                              |
| CD47       | Mouse IgG1, κ  | CD47           | 961            | BD Biosciences | B6H12       |                              |

**Supplementary Table 1. Antibodies included in HT-FC panel, continued.**

| Antigen   | Isotype        | NCBI Gene Name | Entrez Gene ID | Supplier           | Clone              | Note                                                   |
|-----------|----------------|----------------|----------------|--------------------|--------------------|--------------------------------------------------------|
| CD48      | Mouse IgM, κ   | CD48           | 962            | BD Biosciences     | TÜ145              |                                                        |
| CD49a     | Mouse IgG1, κ  | ITGA1          | 3672           | BD Biosciences     | SR84               |                                                        |
| CD49b     | Mouse IgG2a, κ | ITGA2          | 3673           | BD Biosciences     | 12F1               |                                                        |
| CD49c     | Mouse IgG1, κ  | ITGA3          | 3675           | BD Biosciences     | C3 II.1            |                                                        |
| CD49d     | Mouse IgG1, κ  | ITGA4          | 3676           | BD Biosciences     | 9F10               |                                                        |
| CD49e     | Mouse IgG1, κ  | ITGA5          | 3678           | BD Biosciences     | IIA1               |                                                        |
| CD49f     | Rat IgG2a, κ   | ITGA6          | 3655           | BD Biosciences     | GoH3               |                                                        |
| CD5       | Mouse IgG1, κ  | CD5            | 921            | BD Biosciences     | UCHT2              |                                                        |
| CD50      | Mouse IgG2b, κ | ICAM3          | 3385           | BD Biosciences     | TÜ41               |                                                        |
| CD51/CD61 | Mouse IgG1, κ  | ITGAV          | 3685           | BD Biosciences     | 23C6               |                                                        |
| CD52      | Mouse IgG2b, κ | CD52           | 1043           | BioLegend          | HI186              |                                                        |
| CD53      | Mouse IgG1, κ  | CD53           | 963            | BD Biosciences     | HI29               |                                                        |
| CD54      | Mouse IgG1, κ  | ICAM1          | 3383           | BD Biosciences     | HA58               |                                                        |
| CD55      | Mouse IgG2a, κ | CD55           | 1604           | BD Biosciences     | IA10               |                                                        |
| CD56      | Mouse IgG1, κ  | NCAM1          | 4684           | BD Biosciences     | B159               |                                                        |
| CD57      | Mouse IgM, κ   | B3GAT1         | 27087          | BD Biosciences     | HNK-1              |                                                        |
| CD58      | Mouse IgG2a, κ | CD58           | 965            | BD Biosciences     | 1C3                |                                                        |
| CD59      | Mouse IgG2a, κ | CD59           | 966            | BD Biosciences     | p282 (H19)         |                                                        |
| CD6       | Mouse IgG1, κ  | CD6            | 923            | BD Biosciences     | M-T605             |                                                        |
| CD60b     | Mouse IgM      | N/A            | N/A            | Lifespan Bioscienc | not provided       | 9-0-acetylated disialosyl group linked to glycoprotein |
| CD61      | Mouse IgG1, κ  | ITGB3          | 3690           | BD Biosciences     | VI-PL2             |                                                        |
| CD62E     | Mouse IgG1, κ  | SELE           | 6401           | BD Biosciences     | 68-5H11            |                                                        |
| CD62L     | Mouse IgG2a, κ | SELL           | 6402           | BD Biosciences     | Sk11               |                                                        |
| CD62P     | Mouse IgG1, κ  | SELP           | 6403           | BD Biosciences     | AK-1               |                                                        |
| CD63      | Mouse IgG1, κ  | CD63           | 967            | BD Biosciences     | H5C6               |                                                        |
| CD64      | Mouse IgG1, κ  | FCGR1A         | 2209           | BD Biosciences     | 10.1               |                                                        |
| CD65      | Mouse IgM      | N/A            | N/A            | Beckman Coulter    | 88H7               | Type II chain fucoganglioside                          |
| CD65s     | Mouse IgM      | N/A            | N/A            | Abcam              | VIM-2              | Sialylated form of CD65                                |
| CD66      | Mouse IgG2a, κ | CEACAM1        | 109770         | BD Biosciences     | B1.1/CD66          |                                                        |
| CD66b     | Mouse IgM, κ   | CEACAM8        | 1088           | BD Biosciences     | G10F5              |                                                        |
| CD66c     | Mouse IgG1, κ  | CEACAM6        | 4680           | BD Biosciences     | B6.2/CD66c         |                                                        |
| CD66d     | Mouse IgG1     | CEACAM3        | 1084           | Abcam              | CLB-gran/10, IH4Fc |                                                        |
| CD66e     | Mouse IgG1     | CEACAM5        | 1048           | R&D Systems        | 487618             |                                                        |
| CD69      | Mouse IgG1, κ  | CD69           | 969            | BD Biosciences     | FN50               |                                                        |
| CD7       | Mouse IgG1, κ  | CD7            | 924            | BD Biosciences     | M-T701             |                                                        |
| CD70      | Mouse IgG3, κ  | CD70           | 970            | BD Biosciences     | Ki-24              |                                                        |
| CD71      | Mouse IgG2a, κ | TFRC           | 7037           | BD Biosciences     | M-A712             |                                                        |
| CD72      | Mouse IgG2b, κ | CD72           | 971            | BD Biosciences     | J4-118             |                                                        |
| CD73      | Mouse IgG1, κ  | NT5E           | 4907           | BD Biosciences     | AD2                |                                                        |
| CD74      | Mouse IgG2a, κ | CD74           | 972            | BD Biosciences     | M-B741             |                                                        |
| CD75      | Mouse IgM, κ   | N/A            | N/A            | BD Biosciences     | LN1                | Carbohydrate antigen                                   |
| CD77      | Mouse IgM, κ   | N/A            | N/A            | BD Biosciences     | 5B5                | Globotriaosylceramide                                  |
| CD79a     | Mouse IgG1, κ  | CD79A          | 973            | R&D                | 706931             |                                                        |
| CD79b     | Mouse IgG1, κ  | CD79B          | 974            | BD Biosciences     | CB3-1              |                                                        |
| CD8       | Mouse IgG1, κ  | CD8A           | 925            | BD Biosciences     | HIT8a              |                                                        |
| CD80      | Mouse IgG1, κ  | CD80           | 941            | BD Biosciences     | L307.4             |                                                        |
| CD81      | Mouse IgG1, κ  | CD81           | 975            | BD Biosciences     | JS-81              |                                                        |
| CD82      | Mouse IgG2a, κ | CD82           | 3732           | BioLegend          | ASL-24             |                                                        |
| CD83      | Mouse IgG1, κ  | CD83           | 9308           | BD Biosciences     | HB15e              |                                                        |
| CD84      | Mouse IgG1     | CD84           | 8832           | Biolegend          | CD84.1.21          |                                                        |
| CD85A     | Mouse IgG1     | LILRB3         | 11025          | Biolegend          | MKT5.1             |                                                        |
| CD85D     | Rat IgG2a      | LILRB2         | 10288          | Biolegend          | 42D1               |                                                        |
| CD85G     | Mouse IgG1     | LILRA4         | 23547          | BioLegend          | 17G10.2            |                                                        |
| CD85H     | Rat IgG2a, κ   | LILRA2         | 11027          | Biolegend          | 24                 |                                                        |
| CD85J     | Mouse IgG2b, κ | LILRB1         | 10859          | BD Biosciences     | GHI75              |                                                        |
| CD86      | Mouse IgG1, κ  | CD86           | 942            | BD Biosciences     | 2331 (FUN-1)       |                                                        |
| CD87      | Mouse IgG1, κ  | PLAUR          | 5329           | BD Biosciences     | VIM5               |                                                        |
| CD88      | Rabbit IgG     | C5AR1          | 728            | BD Biosciences     | C85-4124           |                                                        |
| CD89      | Mouse IgG1, κ  | FCAR           | 2204           | BD Biosciences     | A59                |                                                        |
| CD8b      | Mouse IgG2a, κ | CD8B           | 926            | BD Biosciences     | 2ST8.5H7           |                                                        |
| CD9       | Mouse IgG1, κ  | CD9            | 928            | BD Biosciences     | M-L13              |                                                        |
| CD90      | Mouse IgG1, κ  | THY1           | 7070           | BD Biosciences     | 5E10               |                                                        |
| CD91      | Mouse IgG1, κ  | LRP1           | 4035           | BD Biosciences     | A2MR-α2            |                                                        |
| CD92      | Mouse IgG2b    | SLC44A1        | 23446          | Abcam              | VIM-15b            |                                                        |
| CD94      | Mouse IgG1, κ  | KLRD1          | 3824           | BD Biosciences     | HP-3D9             |                                                        |

**Supplementary Table 1. Antibodies included in HT-FC panel, continued.**

| Antigen          | Isotype        | NCBI Gene Name | Entrez Gene ID | Supplier       | Clone        | Note                                                   |
|------------------|----------------|----------------|----------------|----------------|--------------|--------------------------------------------------------|
| CD95             | Mouse IgG1, κ  | FAS            | 355            | e-Bioscience   | DX2          |                                                        |
| CD96             | Mouse IgG1     | CD96           | 10225          | Biolegend      | NK92.39      |                                                        |
| CD97             | Mouse IgG1, κ  | CD97           | 976            | BD Biosciences | VIM3b        |                                                        |
| CD98             | Mouse IgG1, κ  | SLC3A2         | 6520           | BD Biosciences | UM7F8        |                                                        |
| CD99             | Mouse IgG2a, κ | CD99           | 4267           | BD Biosciences | TÜ12         |                                                        |
| CDH3             | Mouse IgG1     | CDH3           | 1001           | R&D Systems    | 104805       |                                                        |
| CDH6             | Mouse IgG1     | CDH6           | 1004           | R&D Systems    | 427909       |                                                        |
| CDw198           | Rat IgG2b      | CCR8           | 1237           | R&D Systems    | 191704       |                                                        |
| CDw199           | Mouse IgG2a, κ | CCR9           | 10803          | BD Biosciences | 112509       |                                                        |
| CDw210           | Rat IgG2a, κ   | IL10RA         | 3587           | BD Biosciences | 3F9          |                                                        |
| CDw218a          | Mouse IgG1, κ  | IL18R1         | 8809           | e-Bioscience   | H44          |                                                        |
| CDw329           | Mouse IgG1, κ  | SIGLEC9        | 27180          | BD Biosciences | E10-286      |                                                        |
| CDw93            | Mouse IgG2b, κ | CD93           | 22918          | BD Biosciences | R139         |                                                        |
| CLA              | Rat IgM, κ     | SELPLG         | 6404           | BD Biosciences | HECA-452     | Modified form of CD162                                 |
| CLIP             | Mouse IgG1, κ  | N/A            | N/A            | BD Biosciences | CerCLIP      | MHC Class II associated invariant chain peptides       |
| DCIR             | Mouse IgG1, κ  | CLEC4A         | 50856          | BD Biosciences | I3-612       |                                                        |
| EGF-R            | Mouse IgG2b, κ | EGFR           | 1956           | BD Biosciences | EGFR1        |                                                        |
| FMC7             | Mouse IgM, κ   | MS4A1          | 931            | BD Biosciences | FMC7         |                                                        |
| fMLP-R           | Mouse IgG1, κ  | FPR1           | 2357           | BD Biosciences | 5F1          |                                                        |
| HPRC             | Mouse IgG1, κ  | N/A            | N/A            | BD Biosciences | BB9          | Unknown surface glycoprotein                           |
| HLA-A2           | Mouse IgG2b, κ | HLA-A          | 3105           | BD Biosciences | BB7.2        |                                                        |
| HLA-ABC          | Mouse IgG1, κ  | ABCA1          | 19             | BD Biosciences | DX17         |                                                        |
| HLA-DM           | Mouse IgG1, κ  | HFE            | 3077           | BD Biosciences | MaP.DM1      |                                                        |
| HLA-DR           | Mouse IgG2b, κ | HFE            | 3077           | BD Biosciences | TU36         |                                                        |
| ITGB7            | Rat IgG2a, κ   | ITGB7          | 3695           | BD Biosciences | FIB504       |                                                        |
| LTBR             | Mouse IgG1, κ  | LTBR           | 4055           | BD Biosciences | hTNFR-RP-M12 |                                                        |
| MIC A/B          | Mouse IgG2a, κ | MICA/MICB      | 100507436/4277 | BD Biosciences | 6D4          |                                                        |
| PAC-1            | Mouse IgM, κ   | DUSP2          | 1844           | BD Biosciences | PAC-1        |                                                        |
| Podoplanin       | Rat IgG2a, λ   | PDPN           | 10630          | BioLegend      | NC-08        |                                                        |
| SSEA-3           | Rat IgM        | FUT4           |                | BD Biosciences | MC631        |                                                        |
| SSEA-4           | Mouse IgG3     | FUT4           |                | BD Biosciences | MC813-70     |                                                        |
| Stro-1           | Mouse IgM, λ   | N/A            | N/A            | BioLegend      | STRO-1       | Unknown surface antigen                                |
| TCR αβ           | Mouse IgM, κ   | TRATRB         | 6955/6957      | BD Biosciences | T10B9.1A-31  |                                                        |
| TCR γδ           | Mouse IgG1, κ  | TRG/TRD        | 6965/6964      | BD Biosciences | B1           |                                                        |
| TPBG             | Mouse IgG1     | TPBG           | 7162           | R&D Systems    | 524744       |                                                        |
| Vβ8 TCR          | Mouse IgG2b, κ | N/A            | N/A            | BD Biosciences | JR2          | Variable β8 subunit (Vβ8) of α/β T cell receptor (TCR) |
| Vδ2 TCR          | Mouse IgG1, κ  | N/A            | N/A            | BD Biosciences | B6           | Variable δ2 subunit (Vδ2) of γ/δ T cell receptor (TCR) |
| β2-microglobulin | Mouse IgM, κ   | B2M            | 567            | BD Biosciences | TÜ99         |                                                        |
