# Supplementary material for: Cell Surface Profiling Using High-Throughput Flow Cytometry: A Platform for Biomarker Discovery and Analysis of Cellular Heterogeneity
Source: PubMed Central journal article supplement (PMC4149490; doi:10.1371/journal.pone.0105602), 2014-08-29
Supplement: pone.0105602.s007.pdf [file pone.0105602.s007.pdf]

Table S2. Validation of antigens influenced by enzymatic digestion.

| Antigen | Control  | Trypsin Treated |          |              | Collagenase Treated |         |          | Dispase Treated |             |         | Hyaluronidase Treated |             |             | DNase Treated |          |              |             |         |          |              |             |
|---------|----------|-----------------|----------|--------------|---------------------|---------|----------|-----------------|-------------|---------|-----------------------|-------------|-------------|---------------|----------|--------------|-------------|---------|----------|--------------|-------------|
|         | %+ Cells | Antigen         | %+ Cells | Change in %+ | Fold-change         | Antigen | %+ Cells | Change in %+    | Fold-change | Antigen | %+ Cells              | Change in % | Fold-change | Antigen       | %+ Cells | Change in %+ | Fold-change | Antigen | %+ Cells | Change in %+ | Fold-change |
| BLTA    | 18.6     | BLTA            | 10.2     | -8.4         | 0.5                 | BLTA    | 14.1     | -4.5            | 0.8         | BLTA    | 19.5                  | 0.9         | 1           | BLTA          | 19.8     | 1.2          | 1.1         | BLTA    | 19.6     | 1            | 1.1         |
| CD1d    | 39.4     | CD1d            | 31.8     | -7.6         | 0.8                 | CD1d    | 16.7     | -22.7           | 0.4         | CD1d    | 29.1                  | -10.3       | 0.7         | CD1d          | 34.6     | -4.8         | 0.9         | CD1d    | 34.2     | -5.2         | 0.9         |
| CD4     | 27       | CD4             | 18       | -9           | 0.7                 | CD4     | 18.9     | -8.1            | 0.7         | CD4     | 17.9                  | -9.1        | 0.7         | CD4           | 24.2     | -2.8         | 0.9         | CD4     | 22.4     | -4.6         | 0.8         |
| CD8     | 0.3      | CD8             | 0.3      | -0.07        | 0.8                 | CD8     | 0.7      | 0.36            | 2.1         | CD8     | 0.4                   | 0.04        | 1.1         | CD8           | 0.4      | 0.01         | 1           | CD8     | 0.3      | -0.05        | 0.9         |
| CD11b   | 4.2      | CD11b           | 1.4      | -2.83        | 0.3                 | CD11b   | 1.5      | -2.74           | 0.3         | CD11b   | 2.8                   | -1.39       | 0.7         | CD11b         | 3.9      | -0.31        | 0.9         | CD11b   | 4        | -0.25        | 0.9         |
| CD20    | 1.7      | CD20            | 0.5      | -1.17        | 0.3                 | CD20    | 0.9      | -0.79           | 0.5         | CD20    | 2.4                   | 0.73        | 1.4         | CD20          | 0.9      | -0.74        | 0.6         | CD20    | 0.9      | -0.78        | 0.5         |
| CD21    | 33.3     | CD21            | 17       | -16.3        | 0.5                 | CD21    | 21.7     | -11.6           | 0.7         | CD21    | 23                    | -10.3       | 0.7         | CD21          | 30.6     | -2.7         | 0.9         | CD21    | 28.4     | -4.9         | 0.9         |
| CD23    | 22.8     | CD23            | 3.8      | -18.98       | 0.2                 | CD23    | 5.9      | -16.91          | 0.3         | CD23    | 12.3                  | -10.5       | 0.5         | CD23          | 23.5     | 0.7          | 1           | CD23    | 19.9     | -2.9         | 0.9         |
| CD25    | 4        | CD25            | 1.6      | -2.44        | 0.4                 | CD25    | 2.5      | -1.45           | 0.6         | CD25    | 1.7                   | -2.34       | 0.4         | CD25          | 3.3      | -0.68        | 0.8         | CD25    | 2.9      | -1.08        | 0.7         |
| CD27    | 43.1     | CD27            | 18.3     | -24.8        | 0.4                 | CD27    | 29.7     | -13.4           | 0.7         | CD27    | 32.5                  | -10.6       | 0.8         | CD27          | 41.1     | -2           | 1           | CD27    | 40.7     | -2.4         | 0.9         |
| CD30    | 44.2     | CD30            | 20.7     | -23.5        | 0.5                 | CD30    | 29.8     | -14.4           | 0.7         | CD30    | 26.6                  | -17.6       | 0.6         | CD30          | 39.5     | -4.7         | 0.9         | CD30    | 36.9     | -7.3         | 0.8         |
| CD35    | 7.9      | CD35            | 3.8      | -4.04        | 0.5                 | CD35    | 6.3      | -1.6            | 0.8         | CD35    | 4.1                   | -3.73       | 0.5         | CD35          | 7        | -0.86        | 0.9         | CD35    | 6.2      | -1.69        | 0.8         |
| CD36    | 3.7      | CD36            | 2.2      | -1.45        | 0.6                 | CD36    | 2        | -1.63           | 0.6         | CD36    | 4.2                   | 0.54        | 1.1         | CD36          | 2.5      | -1.12        | 0.7         | CD36    | 2.8      | -0.83        | 0.8         |
| CD40    | 4.1      | CD40            | 1.8      | -2.23        | 0.5                 | CD40    | 2.8      | -1.25           | 0.7         | CD40    | 2.4                   | -1.71       | 0.6         | CD40          | 3        | -1.04        | 0.7         | CD40    | 2.4      | -1.72        | 0.6         |
| CD41a   | 5.6      | CD41a           | 2.1      | -3.53        | 0.4                 | CD41a   | 1.1      | -4.53           | 0.2         | CD41a   | 3.6                   | -2.01       | 0.6         | CD41a         | 1.3      | -4.29        | 0.2         | CD41a   | 1.7      | -3.93        | 0.3         |
| CD42a   | 7.2      | CD42a           | 1.9      | -5.29        | 0.3                 | CD42a   | 1.4      | -5.79           | 0.2         | CD42a   | 3.8                   | -3.4        | 0.5         | CD42a         | 2.6      | -4.6         | 0.4         | CD42a   | 7.5      | 0.29         | 1           |
| CD42b   | 1        | CD42b           | 0.1      | -0.91        | 0.1                 | CD42b   | 0.2      | -0.89           | 0.1         | CD42b   | 0.2                   | -0.81       | 0.2         | CD42b         | 0.3      | -0.74        | 0.3         | CD42b   | 0.5      | -0.51        | 0.5         |
| CD48    | 55.1     | CD48            | 38.8     | -16.3        | 0.7                 | CD48    | 37.4     | -17.7           | 0.7         | CD48    | 44.6                  | -10.5       | 0.8         | CD48          | 53.4     | -1.7         | 1           | CD48    | 52.6     | -2.5         | 1           |
| CD51    | 12       | CD51            | 10.5     | -1.5         | 0.9                 | CD51    | 9.4      | -2.61           | 0.8         | CD51    | 9.3                   | -2.69       | 0.8         | CD51          | 9.9      | -2.08        | 0.8         | CD51    | 8.5      | -3.55        | 0.7         |
| CD62L   | 40.8     | CD62L           | 12.9     | -27.9        | 0.3                 | CD62L   | 29.8     | -11             | 0.7         | CD62L   | 30.7                  | -10.1       | 0.8         | CD62L         | 36.4     | -4.4         | 0.9         | CD62L   | 33.5     | -7.3         | 0.8         |
| CD62P   | 1.6      | CD62P           | 0.4      | -1.27        | 0.2                 | CD62P   | 0.3      | -1.3            | 0.2         | CD62P   | 2.1                   | 0.45        | 1.3         | CD62P         | 0.8      | -0.84        | 0.5         | CD62P   | 1.3      | -0.34        | 0.8         |
| CD69    | 6.6      | CD69            | 2.4      | -4.16        | 0.4                 | CD69    | 3.3      | -3.32           | 0.5         | CD69    | 2.8                   | -3.77       | 0.4         | CD69          | 3.9      | -2.74        | 0.6         | CD69    | 4        | -2.63        | 0.6         |
| CD81    | 79.3     | CD81            | 75       | -4.3         | 0.9                 | CD81    | 68.5     | -10.8           | 0.9         | CD81    | 69.5                  | -9.8        | 0.9         | CD81          | 72.1     | -7.2         | 0.9         | CD81    | 65.7     | -13.6        | 0.8         |
| CD87    | 1.2      | CD87            | 0.1      | -1.167       | 0.1                 | CD87    | 0.7      | -0.52           | 0.6         | CD87    | 0.1                   | -1.133      | 0.1         | CD87          | 2        | 0.8          | 1.7         | CD87    | 2.3      | 1.02         | 1.8         |
| CD99    | 19.7     | CD99            | 18.8     | -0.9         | 1                   | CD99    | 7.3      | -12.44          | 0.4         | CD99    | 13.6                  | -6.1        | 0.7         | CD99          | 13.1     | -6.6         | 0.7         | CD99    | 20.6     | 0.9          | 1           |
| CD106   | 1.1      | CD106           | 0.7      | -0.45        | 0.6                 | CD106   | 0.4      | -0.72           | 0.4         | CD106   | 0.3                   | -0.83       | 0.3         | CD106         | 0.4      | -0.71        | 0.4         | CD106   | 0.8      | -0.34        | 0.7         |
| CD108   | 29.7     | CD108           | 20.3     | -9.4         | 0.7                 | CD108   | 17.3     | -12.4           | 0.6         | CD108   | 18.3                  | -11.4       | 0.6         | CD108         | 30.2     | 0.5          | 1           | CD108   | 27.6     | -2.1         | 0.9         |
| CD109   | 1.6      | CD109           | 0.9      | -0.69        | 0.6                 | CD109   | 1.1      | -0.52           | 0.7         | CD109   | 1.9                   | 0.31        | 1.2         | CD109         | 2.2      | 0.61         | 1.4         | CD109   | 2.1      | 0.55         | 1.3         |
| CD118   | 1.3      | CD118           | 0.9      | -0.44        | 0.7                 | CD118   | 0.8      | -0.57           | 0.6         | CD118   | 1.3                   | -0.05       | 1           | CD118         | 1.5      | 0.18         | 1.1         | CD118   | 1.7      | 0.32         | 1.2         |
| CD120A  | 12.6     | CD120A          | 10.2     | -2.4         | 0.8                 | CD120A  | 8.4      | -4.17           | 0.7         | CD120A  | 11.8                  | -0.8        | 0.9         | CD120A        | 13.7     | 1.1          | 1.1         | CD120A  | 9.6      | -2.96        | 0.8         |
| CD120b  | 16.3     | CD120b          | 9.8      | -6.52        | 0.6                 | CD120b  | 12.4     | -3.9            | 0.8         | CD120b  | 4.8                   | -11.53      | 0.3         | CD120b        | 14.4     | -1.9         | 0.9         | CD120b  | 14       | -2.3         | 0.9         |
| CD126   | 29.4     | CD126           | 18.6     | -10.8        | 0.6                 | CD126   | 21.7     | -7.7            | 0.7         | CD126   | 21.8                  | -7.6        | 0.7         | CD126         | 25.9     | -3.5         | 0.9         | CD126   | 26.8     | -2.6         | 0.9         |
| CD134   | 6.3      | CD134           | 3.6      | -2.7         | 0.6                 | CD134   | 0.8      | -5.46           | 0.1         | CD134   | 4.1                   | -2.23       | 0.6         | CD134         | 7.3      | 1.01         | 1.2         | CD134   | 7.3      | 1.01         | 1.2         |
| CD138   | 6.3      | CD138           | 3.7      | -2.62        | 0.6                 | CD138   | 1.1      | -5.14           | 0.2         | CD138   | 4.7                   | -1.61       | 0.7         | CD138         | 6.3      | 0.05         | 1           | CD138   | 6.7      | 0.39         | 1.1         |
| CD143   | 5.3      | CD143           | 0.6      | -4.66        | 0.1                 | CD143   | 0.5      | -4.83           | 0.1         | CD143   | 0.6                   | -4.74       | 0.1         | CD143         | 0.3      | -5.03        | 0           | CD143   | 0.6      | -4.73        | 0.1         |
| CD146   | 44.6     | CD146           | 38.8     | -5.8         | 0.9                 | CD146   | 40.1     | -4.5            | 0.9         | CD146   | 41.8                  | -2.8        | 0.9         | CD146         | 44.6     | 0            | 1           | CD146   | 43.5     | -1.1         | 1           |
| CD150   | 8.5      | CD150           | 4.9      | -3.58        | 0.6                 | CD150   | 6.6      | -1.86           | 0.8         | CD150   | 3.6                   | -4.88       | 0.4         | CD150         | 6.2      | -2.21        | 0.7         | CD150   | 5.5      | -2.91        | 0.7         |
| CD154   | 24.1     | CD154           | 10.6     | -13.5        | 0.4                 | CD154   | 17.1     | -7              | 0.7         | CD154   | 11.4                  | -12.7       | 0.5         | CD154         | 20.6     | -3.5         | 0.9         | CD154   | 20.7     | -3.4         | 0.9         |
| CD157   | 4.6      | CD157           | 4.3      | -0.27        | 0.9                 | CD157   | 5.5      | 0.88            | 1.2         | CD157   | 4                     | -0.56       | 0.9         | CD157         | 3.3      | -1.24        | 0.7         | CD157   | 3.9      | -0.68        | 0.9         |
| CD162   | 86.5     | CD162           | 64.9     | -21.6        | 0.8                 | CD162   | 68.5     | -18             | 0.8         | CD162   | 70                    | -16.5       | 0.8         | CD162         | 86.3     | -0.2         | 1           | CD162   | 86       | -0.5         | 1           |
| CD167   | 6.1      | CD167           | 6.2      | 0.08         | 1                   | CD167   | 6.8      | 0.67            | 1.1         | CD167   | 5.1                   | -1.03       | 0.8         | CD167         | 6.7      | 0.62         | 1.1         | CD167   | 7.4      | 1.25         | 1.2         |
| CD171   | 13.4     | CD171           | 26.9     | 13.5         | 2                   | CD171   | 21.9     | 8.5             | 1.6         | CD171   | 18.4                  | 5           | 1.4         | CD171         | 12.7     | -0.7         | 0.9         | CD171   | 12.9     | -0.5         | 1           |
| CD183   | 25       | CD183           | 14.1     | -10.9        | 0.6                 | CD183   | 14.5     | -10.5           | 0.6         | CD183   | 15.7                  | -9.3        | 0.6         | CD183         | 18.2     | -6.8         | 0.7         | CD183   | 15.8     | -9.2         | 0.6         |
| CD191   | 11.6     | CD191           | 8.8      | -2.82        | 0.8                 | CD191   | 5.7      | -5.91           | 0.5         | CD191   | 12                    | 0.4         | 1           | CD191         | 9.4      | -2.23        | 0.8         | CD191   | 7.7      | -3.88        | 0.7         |

Supplementary Table 2. Validation of antigens influenced by enzymatic digestion, continued.

| Antigen          | Control  |           |          |              | Trypsin Treated |           |          |              | Collagenase Treated |           |          |             | Dispase Treated |           |          |              | Hyaluronidase Treated |           |          |              | DNase Treated |  |  |  |
|------------------|----------|-----------|----------|--------------|-----------------|-----------|----------|--------------|---------------------|-----------|----------|-------------|-----------------|-----------|----------|--------------|-----------------------|-----------|----------|--------------|---------------|--|--|--|
|                  | %+ Cells | Antigen   | %+ Cells | Change in %+ | Fold-change     | Antigen   | %+ Cells | Change in %+ | Fold-change         | Antigen   | %+ Cells | Change in % | Fold-change     | Antigen   | %+ Cells | Change in %+ | Fold-change           | Antigen   | %+ Cells | Change in %+ | Fold-change   |  |  |  |
| CD194            | 0.1      | CD194     | 0        | -0.059       | 0.4             | CD194     | 0        | -0.056       | 0.4                 | CD194     | 0.1      | 0.025       | 1.3             | CD194     | 0        | -0.049       | 0.5                   | CD194     | 0.3      | 0.165        | 2.7           |  |  |  |
| CD195            | 8.6      | CD195     | 3.9      | -4.71        | 0.5             | CD195     | 6.5      | -2.16        | 0.7                 | CD195     | 6.8      | -1.83       | 0.8             | CD195     | 8.1      | -0.5         | 0.9                   | CD195     | 9        | 0.41         | 1             |  |  |  |
| CD196            | 0.8      | CD196     | 0.3      | -0.52        | 0.3             | CD196     | 0.9      | 0.14         | 1.2                 | CD196     | 0.6      | -0.19       | 0.8             | CD196     | 1.1      | 0.26         | 1.3                   | CD196     | 1        | 0.19         | 1.2           |  |  |  |
| CD205            | 36.3     | CD205     | 33.7     | -2.6         | 0.9             | CD205     | 33.1     | -3.2         | 0.9                 | CD205     | 29.8     | -6.5        | 0.8             | CD205     | 34       | -2.3         | 0.9                   | CD205     | 39.2     | 2.9          | 1.1           |  |  |  |
| CD213a2          | 1.1      | CD213a2   | 0.5      | -0.59        | 0.4             | CD213a2   | 0.3      | -0.75        | 0.3                 | CD213a2   | 0.6      | -0.49       | 0.5             | CD213a2   | 0.9      | -0.11        | 0.9                   | CD213a2   | 0.9      | -0.13        | 0.9           |  |  |  |
| CD218b           | 8.4      | CD218b    | 2.7      | -5.71        | 0.3             | CD218b    | 3.9      | -4.54        | 0.5                 | CD218b    | 6.4      | -2.04       | 0.8             | CD218b    | 10.8     | 2.38         | 1.3                   | CD218b    | 11.4     | 2.98         | 1.4           |  |  |  |
| CD223            | 5.4      | CD223     | 10.8     | 5.43         | 2               | CD223     | 8.3      | 2.93         | 1.5                 | CD223     | 5.9      | 0.51        | 1.1             | CD223     | 4.1      | -1.23        | 0.8                   | CD223     | 5.1      | -0.31        | 0.9           |  |  |  |
| CD229            | 56.2     | CD229     | 38.2     | -18          | 0.7             | CD229     | 39.8     | -16.4        | 0.7                 | CD229     | 45.6     | -10.6       | 0.8             | CD229     | 52.4     | -3.8         | 0.9                   | CD229     | 49.7     | -6.5         | 0.9           |  |  |  |
| CD245            | 88.2     | CD245     | 25.4     | -62.8        | 0.3             | CD245     | 9.2      | -79.01       | 0.1                 | CD245     | 86.3     | -1.9        | 1               | CD245     | 63.9     | -24.3        | 0.7                   | CD245     | 59.6     | -28.6        | 0.7           |  |  |  |
| CD247            | 4.8      | CD247     | 0.9      | -3.85        | 0.2             | CD247     | 0.7      | -4.04        | 0.2                 | CD247     | 2.1      | -2.64       | 0.4             | CD247     | 3.2      | -1.6         | 0.7                   | CD247     | 5.2      | 0.46         | 1.1           |  |  |  |
| CD256            | 0.9      | CD256     | 0.4      | -0.51        | 0.4             | CD256     | 0.5      | -0.35        | 0.6                 | CD256     | 1.8      | 0.92        | 2.1             | CD256     | 0.6      | -0.26        | 0.7                   | CD256     | 0.6      | -0.26        | 0.7           |  |  |  |
| CD257            | 48.6     | CD257     | 21.3     | -27.3        | 0.4             | CD257     | 18.3     | -30.3        | 0.4                 | CD257     | 22.9     | -25.7       | 0.5             | CD257     | 42.7     | -5.9         | 0.9                   | CD257     | 43.8     | -4.8         | 0.9           |  |  |  |
| CD258            | 0.4      | CD258     | 0.7      | 0.3          | 1.8             | CD258     | 0.7      | 0.29         | 1.8                 | CD258     | 0.6      | 0.22        | 1.6             | CD258     | 0.7      | 0.37         | 2                     | CD258     | 0.9      | 0.54         | 2.5           |  |  |  |
| CD262            | 12.8     | CD262     | 22.7     | 9.9          | 1.8             | CD262     | 19.3     | 6.5          | 1.5                 | CD262     | 16.8     | 4           | 1.3             | CD262     | 13.4     | 0.6          | 1                     | CD262     | 12.1     | -0.7         | 0.9           |  |  |  |
| CD267            | 14.9     | CD267     | 8.8      | -6.12        | 0.6             | CD267     | 11.3     | -3.6         | 0.8                 | CD267     | 9.9      | -4.96       | 0.7             | CD267     | 9.2      | -5.66        | 0.6                   | CD267     | 9.1      | -5.79        | 0.6           |  |  |  |
| CD269            | 6.4      | CD269     | 10.2     | 3.85         | 1.6             | CD269     | 3        | -3.35        | 0.5                 | CD269     | 8.8      | 2.42        | 1.4             | CD269     | 5.9      | -0.44        | 0.9                   | CD269     | 2.6      | -3.74        | 0.4           |  |  |  |
| CD277            | 1.3      | CD277     | 1.6      | 0.3          | 1.2             | CD277     | 1.7      | 0.46         | 1.4                 | CD277     | 1.2      | -0.04       | 1               | CD277     | 1.7      | 0.45         | 1.4                   | CD277     | 1.8      | 0.49         | 1.4           |  |  |  |
| CD288            | 1.6      | CD288     | 0.8      | -0.8         | 0.5             | CD288     | 8        | 6.39         | 5.1                 | CD288     | 5.3      | 3.78        | 3.4             | CD288     | 0.6      | -0.97        | 0.4                   | CD288     | 5.1      | 3.53         | 3.3           |  |  |  |
| CD300d           | 4.2      | CD300d    | 1.2      | -3.03        | 0.3             | CD300d    | 1.7      | -2.55        | 0.4                 | CD300d    | 1.6      | -2.59       | 0.4             | CD300d    | 6.1      | 1.88         | 1.4                   | CD300d    | 5.9      | 1.62         | 1.4           |  |  |  |
| CD300e           | 2.4      | CD300e    | 0.7      | -1.61        | 0.3             | CD300e    | 1.1      | -1.22        | 0.5                 | CD300e    | 0.5      | -1.85       | 0.2             | CD300e    | 1.1      | -1.22        | 0.5                   | CD300e    | 3.4      | 1.03         | 1.4           |  |  |  |
| CD304            | 13       | CD304     | 4.5      | -8.51        | 0.3             | CD304     | 10.4     | -2.6         | 0.8                 | CD304     | 19.7     | 6.7         | 1.5             | CD304     | 17       | 4            | 1.3                   | CD304     | 17.6     | 4.6          | 1.4           |  |  |  |
| CD307            | 1.6      | CD307     | 0.9      | -0.73        | 0.5             | CD307     | 0.7      | -0.93        | 0.4                 | CD307     | 0.9      | -0.69       | 0.6             | CD307     | 1.4      | -0.19        | 0.9                   | CD307     | 1.2      | -0.43        | 0.7           |  |  |  |
| CD338            | 1.8      | CD338     | 16.9     | 15.08        | 9.3             | CD338     | 7.1      | 5.25         | 3.9                 | CD338     | 13.2     | 11.38       | 7.3             | CD338     | 9.4      | 7.56         | 5.2                   | CD338     | 7.6      | 5.74         | 4.2           |  |  |  |
| GMA DTA          | 9.5      | GMA DTA   | 8.3      | -1.22        | 0.9             | GMA DTA   | 10       | 0.46         | 1                   | GMA DTA   | 5.5      | -3.97       | 0.6             | GMA DTA   | 11.5     | 1.99         | 1.2                   | GMA DTA   | 8.1      | -1.4         | 0.9           |  |  |  |
| HLADM            | 0.3      | HLADM     | 0.4      | 0.12         | 1.4             | HLADM     | 0.4      | 0.14         | 1.5                 | HLADM     | 0.3      | 0.03        | 1.1             | HLADM     | 0.4      | 0.11         | 1.4                   | HLADM     | 0.4      | 0.16         | 1.6           |  |  |  |
| ITGB7            | 38.6     | ITGB7     | 20       | -18.6        | 0.5             | ITGB7     | 19.2     | -19.4        | 0.5                 | ITGB7     | 28.8     | -9.8        | 0.7             | ITGB7     | 32.6     | -6           | 0.8                   | ITGB7     | 30.2     | -8.4         | 0.8           |  |  |  |
| KIR-NKAT2        | 0.2      | KIR-NKAT2 | 0.3      | 0.07         | 1.3             | KIR-NKAT2 | 0.2      | 0            | 1                   | KIR-NKAT2 | 0.3      | 0.04        | 1.2             | KIR-NKAT2 | 0.1      | -0.1         | 0.6                   | KIR-NKAT2 | 0.4      | 0.2          | 1.9           |  |  |  |
| MIC A&B          | 24.6     | MIC A&B   | 29.6     | 5            | 1.2             | MIC A&B   | 29.4     | 4.8          | 1.2                 | MIC A&B   | 33.1     | 8.5         | 1.3             | MIC A&B   | 28.8     | 4.2          | 1.2                   | MIC A&B   | 27.2     | 2.6          | 1.1           |  |  |  |
| TWEAK            | 0.1      | TWEAK     | 1.3      | 1.24         | 13.4            | TWEAK     | 1.9      | 1.75         | 18.5                | TWEAK     | 2.1      | 1.95        | 20.5            | TWEAK     | 2.7      | 2.63         | 27.3                  | TWEAK     | 2.7      | 2.62         | 27.2          |  |  |  |
| p-CAD            | 2.1      | p-CAD     | 0.4      | -1.69        | 0.2             | p-CAD     | 0.2      | -1.88        | 0.1                 | p-CAD     | 1.1      | -0.96       | 0.5             | p-CAD     | 1.1      | -0.94        | 0.5                   | p-CAD     | 2.1      | 0.07         | 1             |  |  |  |
| CD100            | 46.5     | CD100     | 28.6     | -17.9        | 0.6             | CD100     | 38.7     | -7.8         | 0.8                 | CD100     | 31.2     | -15.3       | 0.7             | CD100     | 49.5     | 3            | 1.1                   | CD100     | 45       | -1.5         | 1             |  |  |  |
| CD175s           | 29.7     | CD175s    | 34.9     | 5.2          | 1.2             | CD175s    | 42.6     | 12.9         | 1.4                 | CD175s    | 24.1     | -5.6        | 0.8             | CD175s    | 52.3     | 22.6         | 1.8                   | CD175s    | 31.2     | 1.5          | 1.1           |  |  |  |
| CD227            | 13.6     | CD227     | 13.5     | -0.1         | 1               | CD227     | 12.9     | -0.7         | 0.9                 | CD227     | 13       | -0.6        | 1               | CD227     | 15.7     | 2.1          | 1.2                   | CD227     | 15.3     | 1.7          | 1.1           |  |  |  |
| PAC-1            | 0.1      | PAC-1     | 0.1      | -0.02        | 0.8             | PAC-1     | 0.1      | -0.01        | 0.9                 | PAC-1     | 0.2      | 0.04        | 1.3             | PAC-1     | 0.1      | -0.078       | 0.4                   | PAC-1     | 0.1      | -0.02        | 0.8           |  |  |  |
| CD349            | 1.6      | CD349     | 4.1      | 2.54         | 2.6             | CD349     | 1.3      | -0.32        | 0.8                 | CD349     | 2.2      | 0.64        | 1.4             | CD349     | 2.1      | 0.48         | 1.3                   | CD349     | 2.4      | 0.75         | 1.5           |  |  |  |
| Number affected: |          | 13        |          | 30           | 36              | 12        |          | 29           | 30                  | 4         |          | 25          | 17              | 2         |          | 10           | 12                    | 1         |          | 10           | 8             |  |  |  |

Antigens highlighted in yellow showed both 2-fold relative and 5% absolute difference in at least one enzyme condition, and are listed separately in Supplementary Table 3.

Red and green indicates decreased and increased expression respectively. Changes of  $\geq 5\%$  or  $\geq 2x$  are highlighted. N, normal control; H hyaluronidase; C, collagenase; D, dispase; T, trypsin; DN, DNase.
