# Supplementary material for: Cell Surface Profiling Using High-Throughput Flow Cytometry: A Platform for Biomarker Discovery and Analysis of Cellular Heterogeneity
Source: PubMed Central journal article supplement (PMC4149490; doi:10.1371/journal.pone.0105602), 2014-08-29
Supplement: pone.0105602.s008.pdf [file pone.0105602.s008.pdf]

**Table S3. The 22 most-affected antigens appear predisposed to altered detection by enzymatic digestion.** Several antigens have a soluble as well as membrane-bound form, some have a known extracellular cleavage site, and others are biologically active upon release from the cell surface.

|               | Zola, Swart, Nicholson, Voss                                                                                                                                      | Other literature                                                                                                                                                                                                                                                                                                                                                         |
|---------------|-------------------------------------------------------------------------------------------------------------------------------------------------------------------|--------------------------------------------------------------------------------------------------------------------------------------------------------------------------------------------------------------------------------------------------------------------------------------------------------------------------------------------------------------------------|
| <b>CD1d</b>   | ---                                                                                                                                                               | "In the late endosomes, the CD1d complex is modified, such that after trafficking back to the plasma membrane..." <a href="http://www.nature.com/nri/journal/v3/n1/abs/nri979.html">http://www.nature.com/nri/journal/v3/n1/abs/nri979.html</a>                                                                                                                          |
| <b>CD23</b>   | Continuous proteolytic cleavage of membrane-bound CD23 results in soluble CD23 molecules of varying size                                                          | Also exists as a soluble excreted form. <a href="http://www.uniprot.org/uniprot/P06734">http://www.uniprot.org/uniprot/P06734</a>                                                                                                                                                                                                                                        |
| <b>CD27</b>   | Soluble form is released by activated lymphocytes                                                                                                                 | "After activation of lymphocytes, a soluble form of CD27 is released into the extracellular environment, most likely via proteolytic cleavage"<br><a href="http://iai.asm.org/cgi/reprint/68/5/3036.pdf">http://iai.asm.org/cgi/reprint/68/5/3036.pdf</a>                                                                                                                |
| <b>CD30</b>   | Soluble form of CD30 is released by metalloproteinase                                                                                                             | "Finally, transmembrane signalling by CD30 might be regulated by a soluble form of CD30 that is released by proteolytic cleavage of membrane-anchored CD30"<br><a href="http://www.sciencedirect.com/science/article/pii/S1471489204000852">http://www.sciencedirect.com/science/article/pii/S1471489204000852</a>                                                       |
| <b>CD42a</b>  | ---                                                                                                                                                               | Hale et al. (2002) showed that in vitro bromelain treatment of leukocytes in whole blood proteolytically altered 14 of 59 leukocyte markers studied<br><a href="http://www.pjbs.org/pjnonline/fin975.pdf">http://www.pjbs.org/pjnonline/fin975.pdf</a>                                                                                                                   |
| <b>CD62L</b>  | There is 15 amino acid spacer between the membrane proximal CCP domain and the transmembrane region, which contains the proteolytic cleavage site (Lys283-Ser284) | Constitutively expressed bromelain-sensitive molecules included CD7, CD8 $\alpha$ , CD14, CD16, CD21, CD41, CD42a, CD44, CD45RA, CD48, CD57, CD62L, CD128a, and CD128b<br><a href="http://www.sciencedirect.com/science/article/pii/S152166160295254X">http://www.sciencedirect.com/science/article/pii/S152166160295254X</a>                                            |
| <b>CD99</b>   | ---                                                                                                                                                               | "In this paper we demonstrate that CD99 localized at the endothelial cell junctions is sensitive to proteolysis by gingipains" <a href="http://www.ncbi.nlm.nih.gov/pmc/articles/PMC1418641/">http://www.ncbi.nlm.nih.gov/pmc/articles/PMC1418641/</a>                                                                                                                   |
| <b>CD120b</b> | CD120b is readily cleaved by the metalloproteinase TACE into a soluble form that retains the ability to bind TNF                                                  | BAL cells express and shed TNF-Rs [CD120a, CD120b], as is known for cells of other body compartments <a href="http://www.sciencedirect.com/science/article/pii/S1043466698904690">http://www.sciencedirect.com/science/article/pii/S1043466698904690</a>                                                                                                                 |
| <b>CD134</b>  | Member of the TNF/NGF receptor family (see CD27, CD30, CD40, CD95, CD120a, CD120b, CD137).                                                                        | The transient nature of CD134 and CD137 expression on activated CD4+ T cells is the result of proteolytic shedding <a href="http://onlinelibrary.wiley.com/doi/10.1002/1521-4141%28200212%2932:12%3C3617::AID-IMMU3617%3E3.0.CO;2-M/pdf">http://onlinelibrary.wiley.com/doi/10.1002/1521-4141%28200212%2932:12%3C3617::AID-IMMU3617%3E3.0.CO;2-M/pdf</a>                 |
| <b>CD138</b>  | The extracellular region contains five potential glycosaminoglycan attachment sites and a protease cleavage site at its C-terminus.                               | "Owing to the sensitivity of CD138 towards proteolytic cleavage"<br><a href="http://www.finels.com/product/up_files/M7228.pdf">http://www.finels.com/product/up_files/M7228.pdf</a>                                                                                                                                                                                      |
| <b>CD143</b>  | Soluble forms of CD143 are detectable in plasma, urine, amniotic and cerebrospinal fluids and seminal plasma                                                      | Soluble serum ACE originates from endothelial cells by proteolytic cleavage by an unidentified protease of the Arg <sup>1203</sup> -Ser <sup>1204</sup> peptide bond in the stalk region near the C-terminal transmembrane sequence of the ACE molecule.<br><a href="http://www.clinchem.org/cgi/content/full/51/6/1040">www.clinchem.org/cgi/content/full/51/6/1040</a> |
| <b>CD154</b>  | Soluble forms of CD154 are produced as a result of intracellular cleavage by a matrix metalloproteinase in activated cells.                                       | Furthermore, soluble CD154 generated through proteolytic cleavage of the extracellular domain is biologically active, especially in multimeric forms.<br><a href="http://www.ncbi.nlm.nih.gov/pmc/articles/PMC1539120/">http://www.ncbi.nlm.nih.gov/pmc/articles/PMC1539120/</a>                                                                                         |
| <b>CD171</b>  | The CD171 ectodomain can be shed as a result of post-translational cleavage by disintegrin metalloproteinase (ADAM). Plasmin can also cleave                      | Shed as large ectodomain fragments as a result of posttranslational cleavage<br><a href="http://prow.nci.nih.gov/guide/1813332452_g.htm">http://prow.nci.nih.gov/guide/1813332452_g.htm</a>                                                                                                                                                                              |

| CD171 at the same site. |                                                                                                                                                                |                                                                                                                                                                                                                                                                                                                                                     |
|-------------------------|----------------------------------------------------------------------------------------------------------------------------------------------------------------|-----------------------------------------------------------------------------------------------------------------------------------------------------------------------------------------------------------------------------------------------------------------------------------------------------------------------------------------------------|
| <b>CD191</b>            | ---                                                                                                                                                            | ---                                                                                                                                                                                                                                                                                                                                                 |
| <b>CD218b</b>           | ---                                                                                                                                                            | ---                                                                                                                                                                                                                                                                                                                                                 |
| <b>CD223</b>            | ---                                                                                                                                                            | A soluble form of human CD223 has been detected by ELISA in human serum <a href="http://www.jimmunol.org/content/173/11/6806.long">http://www.jimmunol.org/content/173/11/6806.long</a>                                                                                                                                                             |
| <b>CD245</b>            | ---                                                                                                                                                            | The expression level of CD245 on lymphocytes can be upregulated after 3-7 days stimulation with PHA. It has been reported that CD245 is involved in signal transduction and costimulation of T and NK cells. <a href="http://www.biolegend.com/pe-anti-human-cd245-p220-240-5039.html">www.biolegend.com/pe-anti-human-cd245-p220-240-5039.html</a> |
| <b>CD257</b>            | The extracellular domain is shed as a result of proteolysis in the extracellular stalk region.                                                                 | An active, soluble homotrimer form can be released by proteolytic cleavage <a href="http://www.copewithcytokines.org/cope.cgi?key=BLyS">www.copewithcytokines.org/cope.cgi?key=BLyS</a>                                                                                                                                                             |
| <b>CD288</b>            | ---                                                                                                                                                            | BAFF is ... expressed as a transmembrane protein on various cell types .... The transmembrane form can be cleaved from the membrane, generating a soluble protein fragment. <a href="http://en.wikipedia.org/wiki/B-cell_activating_factor">http://en.wikipedia.org/wiki/B-cell_activating_factor</a>                                               |
| <b>CD304</b>            | A soluble isoform (sNRP1) consists of the CUB and Factor V/VIII homology domains only.                                                                         | ---                                                                                                                                                                                                                                                                                                                                                 |
| <b>CD338</b>            | ---                                                                                                                                                            | ---                                                                                                                                                                                                                                                                                                                                                 |
| <b>ITGB7</b>            | ---                                                                                                                                                            | ---                                                                                                                                                                                                                                                                                                                                                 |
| <b>TWEAK</b>            | A soluble isoform of CD255 consisting of 156 amino acids comprising the receptor binding portion of the ectodomain results from proteolytic cleavage by furin. | A soluble form of TWEAK is generated from the membrane-associated molecule by proteolytic cleavage after Arg 93, suggesting that TWEAK may have long-range effects. TWEAK is expressed widely in many tissues and cells. <a href="http://www.ncbi.nlm.nih.gov/pmc/articles/PMC2878507/">http://www.ncbi.nlm.nih.gov/pmc/articles/PMC2878507/</a>    |

Most information from "*Leukocyte and Stromal Cell Molecules: The CD Markers*", by Heddy Zola, Bernadette Swart, Ian Nicholson and Elena Voss, Wiley, 2007 (<http://wiley.com/WileyCDA/WileyTitle/productCd-0471701327.html>) supplemented with other literature and sources as indicated.
