# Supplementary material for: Cell Surface Profiling Using High-Throughput Flow Cytometry: A Platform for Biomarker Discovery and Analysis of Cellular Heterogeneity
Source: PubMed Central journal article supplement (PMC4149490; doi:10.1371/journal.pone.0105602), 2014-08-29
Supplement: pone.0105602.s009.pdf [file pone.0105602.s009.pdf]

**Table S4. Fixation following antibody staining significantly alters detection of a small proportion of markers.**

| Antigen | Control | Fixation Post-Stain | Absolute Change | Fold Change | Notes and Reference                                                                                                                                                                                                        |
|---------|---------|---------------------|-----------------|-------------|----------------------------------------------------------------------------------------------------------------------------------------------------------------------------------------------------------------------------|
| CD53    | 11.3    | 3.12                | 8.2             | 0.28        | HI29 induced homotypic cell aggregation of lymphoid cell lines<br><a href="http://www.sciencedirect.com/science/article/pii/S0171298597800587">http://www.sciencedirect.com/science/article/pii/S0171298597800587</a>      |
| CD74    | 9.0     | 33.1                | 24.1            | 3.67        | No specific information on this antibody, antigen, epitope                                                                                                                                                                 |
| CD109   | 7.4     | 2.3                 | 5.2             | 0.30        | Some epitopes disrupted by SDS<br><a href="http://bloodjournal.hematologylibrary.org/content/99/5/1692.full.pdf">http://bloodjournal.hematologylibrary.org/content/99/5/1692.full.pdf</a>                                  |
| CD114   | 11.5    | 2.9                 | 8.6             | 0.25        | Raised against intact cell membrane protein<br><a href="http://www.sciencedirect.com/science/article/pii/S0301472X10003541">http://www.sciencedirect.com/science/article/pii/S0301472X10003541</a>                         |
| CD134   | 14.1    | 6.2                 | 7.9             | 0.44        | Undergoes conformational change with eGFP tag<br><a href="http://jvi.asm.org/content/80/7/3386.full.pdf">http://jvi.asm.org/content/80/7/3386.full.pdf</a>                                                                 |
| CD159c  | 15.5    | 0.48                | 15.0            | 0.03        | No specific information on this antibody, antigen, epitope                                                                                                                                                                 |
| CD200   | 15.3    | 5.6                 | 9.7             | 0.37        | No specific information on this antibody, antigen, epitope                                                                                                                                                                 |
| CD201   | 14.8    | 4.8                 | 10.0            | 0.32        | Antibody blocks activated protein C binding to endothelial protein C receptor<br><a href="http://www.copewithcytokines.de/cope.cgi?key=CD201_REFERENCES">http://www.copewithcytokines.de/cope.cgi?key=CD201_REFERENCES</a> |

A number of other epitopes showed > 10% absolute change without reaching a two-fold relative difference, including  $\beta$ 2-microglobulin, CD44, CD47, CD92, CD96, CD105, CD111, CD119, CD138, CD166, CD221, CD222, CD223, CD257, CD340, CD344, MICA/B and LT $\beta$ R.
