# Supplementary material for: Cell Surface Profiling Using High-Throughput Flow Cytometry: A Platform for Biomarker Discovery and Analysis of Cellular Heterogeneity
Source: PubMed Central journal article supplement (PMC4149490; doi:10.1371/journal.pone.0105602), 2014-08-29
Supplement: pone.0105602.s010.pdf [file pone.0105602.s010.pdf]

**Table S5. Antigens with significant alteration in detection after cryopreservation and thawing.**

|              | <b>Control (%)</b> | <b>Cryopreservation (%)</b> | <b>Absolute Change (%)</b> | <b>Fold Change</b> |
|--------------|--------------------|-----------------------------|----------------------------|--------------------|
| CD138        | 30.9               | 10.5                        | -20.4                      | 0.34               |
| CD18         | 17.4               | 36.3                        | 18.9                       | 2.09               |
| CD186        | 0.39               | 5.38                        | 4.99                       | 13.79              |
| CDw199; CCR9 | 0.55               | 7.85                        | 7.3                        | 14.27              |
| CD277        | 0.15               | 6.94                        | 6.79                       | 46.27              |
| CD284        | 1.59               | 17.6                        | 16.01                      | 11.07              |
| CD288        | 2.63               | 50.8                        | 48.17                      | 19.32              |
| CD337        | 7.07               | 25.8                        | 18.73                      | 3.65               |
| CD300C       | 0.79               | 14.9                        | 14.11                      | 18.86              |
