# Supplementary material for: Cell Surface Profiling Using High-Throughput Flow Cytometry: A Platform for Biomarker Discovery and Analysis of Cellular Heterogeneity
Source: PubMed Central journal article supplement (PMC4149490; doi:10.1371/journal.pone.0105602), 2014-08-29
Supplement: pone.0105602.s012.pdf [file pone.0105602.s012.pdf]

Supplementary Table 7. Clusters of antigens expressed on primary ccRCC cancer and stromal cell populations, continued.

| Immune cells and fibroblasts cluster       |           |           |           |           |           |           |              |              |              |              |              |              |               |               |               |               |               |               |          |          |          |          |          |          |
|--------------------------------------------|-----------|-----------|-----------|-----------|-----------|-----------|--------------|--------------|--------------|--------------|--------------|--------------|---------------|---------------|---------------|---------------|---------------|---------------|----------|----------|----------|----------|----------|----------|
|                                            | 229 CD45+ | 243 CD45+ | 266 CD45+ | 267 CD45+ | 278 CD45+ | 284 CD45+ | 229 Endothel | 243 Endothel | 266 Endothel | 267 Endothel | 278 Endothel | 284 Endothel | 229 Fibroblas | 243 Fibroblas | 266 Fibroblas | 267 Fibroblas | 278 Fibroblas | 284 Fibroblas | 229 Lin- | 243 Lin- | 266 Lin- | 267 Lin- | 278 Lin- | 284 Lin- |
| CD38                                       | 37.8      | 54.7      | 41.7      | 47        | 54.7      | 58.6      | 1.36         | 36.5         | 21.4         | 34.2         | 22.6         | 19.7         | 13.8          | 56.1          | 31.3          | 73.2          | 21.7          | 13.8          | 2.88     | 9.71     | 5.56     | 24.3     | 36.2     | 2.56     |
| CD49D                                      | 83.8      | 88.2      | 98.5      | 96.6      | 98.3      | 95.4      | 10.3         | 44.2         | 62.5         | 24.7         | 18.2         | 11.2         | 93.9          | 98.4          | 73.3          | 80.5          | 98.2          | 93.4          | 4.23     | 8.02     | 8.93     | 26.8     | 8.49     | 7.78     |
| CD97                                       | 16.5      | 24.4      | 47.2      | 44.6      | 67        | 59.3      | 0.239        | 3.48         | 1.14         | 1.05         | 5.75         | 3.48         | 23.5          | 21.8          | 3.09          | 19.4          | 37.3          | 67.3          | 0.88     | 0.751    | 1.6      | 2.82     | 1.16     | 2.7      |
| CD14                                       | 48.3      | 31.8      | 33.3      | 62.1      | 48.1      | 39.7      | 5.61         | 4.35         | 5.71         | 22.8         | 33.8         | 22.4         | 40.4          | 23            | 12.7          | 37.3          | 60.1          | 61.5          | 27.2     | 1.7      | 9.54     | 28.1     | 51.6     | 18.7     |
| CD44                                       | 92.5      | 94.2      | 96.1      | 93.1      | 98.8      | 93.9      | 10.4         | 14.7         | 21.2         | 9.5          | 35.6         | 2.7          | 58.5          | 69.8          | 21            | 73.9          | 86.9          | 87.4          | 14.1     | 39.4     | 4.86     | 27.9     | 92.1     | 14.8     |
| CD148                                      | 73.5      | 91.7      | 91        | 90.8      | 96.9      | 92.6      | 13.7         | 29.2         | 21.4         | 27.1         | 28.2         | 11.2         | 93.8          | 99.1          | 37.5          | 86.5          | 91.6          | 96.6          | 79.1     | 73.8     | 30.6     | 51.7     | 90.1     | 61.4     |
| Endothelial and fibroblast cluster         |           |           |           |           |           |           |              |              |              |              |              |              |               |               |               |               |               |               |          |          |          |          |          |          |
|                                            | 229 CD45+ | 243 CD45+ | 266 CD45+ | 267 CD45+ | 278 CD45+ | 284 CD45+ | 229 Endothel | 243 Endothel | 266 Endothel | 267 Endothel | 278 Endothel | 284 Endothel | 229 Fibroblas | 243 Fibroblas | 266 Fibroblas | 267 Fibroblas | 278 Fibroblas | 284 Fibroblas | 229 Lin- | 243 Lin- | 266 Lin- | 267 Lin- | 278 Lin- | 284 Lin- |
| CDW93                                      | 30        | 6.18      | 13.3      | 14.2      | 24.6      | 27.4      | 73           | 74.4         | 96           | 70.1         | 64.9         | 53.2         | 50.9          | 75.6          | 15.6          | 36.4          | 47.6          | 52            | 30.4     | 11.1     | 9.17     | 17.3     | 26.5     | 20.7     |
| CD39                                       | 27.7      | 31.3      | 26.1      | 35.8      | 29.9      | 19.5      | 98.1         | 83.9         | 100          | 93.9         | 98.4         | 98.5         | 80.1          | 86.8          | 17.5          | 65.6          | 97            | 89.4          | 0.443    | 1.15     | 0.588    | 0.563    | 1.43     | 4.27     |
| CD141                                      | 22.1      | 15        | 19.8      | 36.7      | 20.9      | 29.6      | 96.8         | 100          | 97.5         | 99.5         | 100          | 99.5         | 71.5          | 86.8          | 14.7          | 90.3          | 95.1          | 98            | 2.92     | 43.2     | 3.67     | 48.9     | 42.7     | 15.6     |
| CD130                                      | 7.58      | 4.33      | 6.92      | 15.4      | 12.3      | 3.78      | 47.7         | 96.2         | 74.1         | 72.5         | 85.2         | 68.4         | 64.1          | 51.6          | 22.2          | 52.9          | 80.8          | 63            | 33.3     | 23       | 20.9     | 45.6     | 28.6     | 29.7     |
| CD34                                       | 3.2       | 2.52      | 1.49      | 4.99      | 0.747     | 5.85      | 99.8         | 99.1         | 100          | 100          | 100          | 100          | 100           | 100           | 35.1          | 74.7          | 96.7          | 100           | 3.82     | 8.24     | 4.58     | 63.2     | 0.833    | 20.2     |
| CD146                                      | 21.4      | 11        | 12.1      | 20.7      | 16.1      | 19.8      | 100          | 98.7         | 97.3         | 100          | 98.6         | 99.5         | 96.9          | 99.2          | 64.2          | 98.9          | 100           | 98            | 34.9     | 25.3     | 31.2     | 66.4     | 36.9     | 62.5     |
| CD107A                                     | 9.97      | 13.9      | 6.3       | 15.7      | 9.93      | 12.9      | 45.1         | 73.2         | 57.1         | 56           | 54.9         | 64.2         | 61.8          | 32.5          | 7.44          | 39.8          | 53            | 50.5          | 10.7     | 9.31     | 3.62     | 16.4     | 5.43     | 32       |
| CD165                                      | 11.6      | 2.32      | 0.524     | 5.53      | 1.46      | 4.45      | 66.7         | 78.9         | 41.5         | 90.5         | 75.4         | 73           | 93            | 23.1          | 2.9           | 46.7          | 93.2          | 79.9          | 0.486    | 0.199    | 1.16     | 1.58     | 0.664    | 2.66     |
| CD317                                      | 30.7      | 40.1      | 52.8      | 55.1      | 45.6      | 24.9      | 99.2         | 100          | 100          | 78.2         | 87.8         | 80           | 91.3          | 100           | 50            | 62.4          | 99.2          | 87.4          | 8.92     | 29.8     | 1        | 29.7     | 77.9     | 63.6     |
| Immune, endothelial and fibroblast cluster |           |           |           |           |           |           |              |              |              |              |              |              |               |               |               |               |               |               |          |          |          |          |          |          |
|                                            | 229 CD45+ | 243 CD45+ | 266 CD45+ | 267 CD45+ | 278 CD45+ | 284 CD45+ | 229 Endothel | 243 Endothel | 266 Endothel | 267 Endothel | 278 Endothel | 284 Endothel | 229 Fibroblas | 243 Fibroblas | 266 Fibroblas | 267 Fibroblas | 278 Fibroblas | 284 Fibroblas | 229 Lin- | 243 Lin- | 266 Lin- | 267 Lin- | 278 Lin- | 284 Lin- |
| CD74                                       | 43        | 20        | 26.1      | 36.6      | 18.8      | 0.582     | 11.6         | 8.82         | 74.1         | 11.3         | 53.2         | 0.405        | 31.6          | 13.7          | 11            | 9.41          | 38.4          | 1             | 2.34     | 0.861    | 3.26     | 3.03     | 3.49     | 0.358    |
| CD85J                                      | 48.7      | 21.6      | 40.4      | 58.5      | 20        | 31.6      | 46.3         | 27.2         | 62.1         | 55.4         | 32.9         | 13.8         | 39.5          | 1.95          | 19.8          | 45.4          | 10.7          | 0.741         | 22.9     | 0.877    | 26.4     | 39.3     | 1.74     | 0.923    |
| CD84                                       | 76.5      | 71.3      | 67.7      | 82.2      | 86.5      | 78.4      | 89.7         | 79.1         | 81.2         | 89.5         | 82.9         | 77.7         | 89.4          | 92.8          | 18.4          | 93.5          | 93            | 95.7          | 26.8     | 3.95     | 21       | 52.1     | 73       | 49.1     |
| CD120a                                     | 38.9      | 33.1      | 14.2      | 65        | 31.1      | 12.8      | 11.6         | 41.3         | 56.5         | 43.5         | 43.3         | 26.2         | 41.3          | 48.6          | 12.8          | 53.8          | 50            | 24.3          | 3.78     | 5.01     | 7.87     | 26.6     | 18.1     | 14.1     |
| CD143                                      | 33.1      | 29.7      | 15.5      | 65.7      | 25.5      | 14.5      | 70.6         | 100          | 97.1         | 100          | 69.1         | 75.3         | 45.1          | 97            | 16.1          | 80.7          | 41.7          | 24.8          | 2.22     | 2.74     | 18.1     | 34.7     | 17.1     | 11.5     |
| CD31                                       | 65.3      | 77.7      | 73.3      | 76.5      | 55.3      | 60.3      | 100          | 96.8         | 100          | 100          | 99.7         | 100          | 99.7          | 60.8          | 68.7          | 61.5          | 69.1          | 68.3          | 11       | 4.41     | 27.6     | 30.7     | 8.1      | 20.6     |
| CD102                                      | 38.4      | 33.4      | 68.4      | 43.8      | 53.7      | 54.1      | 99.5         | 99.4         | 100          | 99.7         | 97.8         | 99.3         | 48.5          | 51.1          | 20.2          | 17.4          | 76            | 41.7          | 6.38     | 1.95     | 6.76     | 10.1     | 47.5     | 1.96     |
| CD298                                      | 81.7      | 91.6      | 95.8      | 97.6      | 98        | 0.181     | 100          | 100          | 100          | 100          | 100          | 99.6         | 97.8          | 51.7          | 51.3          | 92.5          | 97.6          | 1             | 53.7     | 23.5     | 18.4     | 37.1     | 52.8     | 0.108    |
| Endothelial, fibroblast and cancer cluster |           |           |           |           |           |           |              |              |              |              |              |              |               |               |               |               |               |               |          |          |          |          |          |          |
|                                            | 229 CD45+ | 243 CD45+ | 266 CD45+ | 267 CD45+ | 278 CD45+ | 284 CD45+ | 229 Endothel | 243 Endothel | 266 Endothel | 267 Endothel | 278 Endothel | 284 Endothel | 229 Fibroblas | 243 Fibroblas | 266 Fibroblas | 267 Fibroblas | 278 Fibroblas | 284 Fibroblas | 229 Lin- | 243 Lin- | 266 Lin- | 267 Lin- | 278 Lin- | 284 Lin- |
| CD66e                                      | 61.9      | 36        | 47.1      | 70.2      | 59.8      | 48        | 99.4         | 86.7         | 95.7         | 96.1         | 98.6         | 98           | 99.5          | 93.7          | 79.1          | 95.2          | 98.5          | 99.1          | 76.4     | 62.1     | 54.3     | 94.3     | 89.1     | 86       |
| CD175s                                     | 52.9      | 22.6      | 40.2      | 56.1      | 32.6      | 35.1      | 99           | 84.2         | 100          | 93.9         | 100          | 97.4         | 97.9          | 78.9          | 89.7          | 96.7          | 98.9          | 99.4          | 57.5     | 30.3     | 66.1     | 62.8     | 80.6     | 75       |
| CD105                                      | 38.8      | 36        | 60.4      | 63.6      | 35.7      | 47.3      | 99.7         | 100          | 100          | 100          | 98.5         | 100          | 99            | 100           | 83            | 89.6          | 100           | 97.5          | 61.9     | 11.5     | 63.7     | 64.6     | 62.8     | 57       |
| CD223                                      | 42.3      | 24.5      | 54.1      | 59.2      | 56.7      | 31.7      | 100          | 100          | 100          | 100          | 99.6         | 100          | 95            | 98.4          | 97.4          | 100           | 99.3          | 83.2          | 6.64     | 87.1     | 82       | 77.4     | 51.7     |          |
| CD283                                      | 27.5      | 13        | 43.2      | 37.1      | 30.1      | 3.69      | 76.5         | 75           | 94.6         | 81.5         | 73.9         | 66.2         | 77.2          | 71            | 55.3          | 75.5          | 65.6          | 60.9          | 41.8     | 6.88     | 53.7     | 43.9     | 51.5     | 10.5     |
| CD51,2f,C                                  | 23.1      | 4.9       | 7.42      | 20.2      | 4.97      | 7.9       | 90.4         | 85.7         | 81.5         | 92.9         | 86.1         | 93.4         | 95.5          | 98.6          | 25            | 96            | 100           | 99.3          | 90.5     | 56.9     | 16.8     | 86.1     | 52.4     | 85.3     |
| CD61                                       | 13.4      | 4.26      | 1.93      | 12.2      | 3.93      | 12.9      | 77.1         | 93.8         | 100          | 92.9         | 100          | 84.1         | 98.8          | 96.6          | 10.5          | 100           | 100           | 99.5          | 81.8     | 53.3     | 1        | 92.6     | 37.4     | 81.9     |
| CD200                                      | 17.6      | 3.75      | 5.41      | 6.25      | 13.7      | 6.34      | 94.2         | 82.9         | 100          | 96.4         | 100          | 97.7         | 98.3          | 75.7          | 53.5          | 71.3          | 96.8          | 94.5          | 99.4     | 72.7     | 77       | 8.37     | 95.5     | 59       |
| CD9                                        | 74        | 22.3      | 21.9      | 52.7      | 85.4      | 37.6      | 99.6         | 95.1         | 98.2         | 97.2         | 100          | 97.6         | 99.6          | 92.1          | 93.2          | 99.6          | 99.5          | 98.5          | 96.6     | 81.3     | 97.4     | 96.1     | 100      | 92.2     |
| CD49A                                      | 32.6      | 10.1      | 23.4      | 27.5      | 42.4      | 35.3      | 98.8         | 100          | 100          | 100          | 97.3         | 100          | 100           | 98.2          | 100           | 99.4          | 100           | 100           | 99.4     | 57.9     | 98.5     | 96.2     | 99.7     | 91.5     |
| CD49B                                      | 19.5      | 15.7      | 20.2      | 12.6      | 27.5      | 14.4      | 100          | 99           | 100          | 99.5         | 100          | 99.5         | 97.7          | 94.4          | 100           | 92.6          | 93.8          | 99.1          | 99.4     | 84.8     | 95.3     | 98.5     | 99.7     | 91.8     |
| CD49C                                      | 31        | 11.9      | 15.8      | 21.2      | 62.1      | 50.4      | 99.5         | 97.1         | 100          | 96.1         | 97.8         | 99.6         | 98.5          | 98.1          | 100           | 100           | 99.1          | 99.1          | 98.4     | 95.7     | 97.4     | 95.3     | 100      | 91.2     |
| CD49F                                      | 48.9      | 45.9      | 45.4      | 75.1      | 65.6      | 53.9      | 100          | 100          | 100          | 100          | 100          | 99.6         | 95.9          | 100           | 100           | 100           | 98.8          | 99.2          | 98.6     | 85.9     | 98       | 97.2     | 99.7     | 88.9     |
| CD63                                       | 63.8      | 40.2      | 52.6      | 71.9      | 68.9      | 71.3      | 99.5         | 98.7         | 100          | 100          | 100          | 100          | 99.6          | 98.2          | 92.2          | 100           | 100           | 100           | 99.5     | 96.7     | 84.5     | 97.6     | 99.9     | 94.8     |
| CD304                                      | 14.6      | 2.94      | 23.4      | 30.7      | 10.7      | 14.4      | 94.3         | 72.7         | 86.8         | 94.9         | 95.6         | 94.5         | 100           | 87.2          | 78.3          | 95.6          | 100           | 100           | 99.1     | 44.6     | 72.1     | 88.6     | 97       | 84       |
