# Supplementary material for: Cell Surface Profiling Using High-Throughput Flow Cytometry: A Platform for Biomarker Discovery and Analysis of Cellular Heterogeneity
Source: PLoS One. 2014 Aug 29;9(8):e105602. doi: 10.1371/journal.pone.0105602 (PMC4149490; doi:10.1371/journal.pone.0105602)
Supplement: Table S6 — Cell surface profiling data of samples in Figure 3 . (XLSX) [file pone.0105602.s011.xlsx]

## Sheet: Sheet1
Table S6. Cell surface profiling data of samples in Figure 3
	PBMC 1	PBMC 2	PBMC 3	MDA-MB-231-1	MDA-MB-231-2	MDA-MB-231-3	22RV1-1	22RV1-2	22RV1-3	786-0	RCC145	RCC182	RCC183	RCC22-1	RCC22-2	RCC243	RCC323	RCC48	RCC48x	RCC61	OvCa CAFs-1	OvCa CAFs-2	OvCa CAFs-3	OvCa CAFs-4	HNC CAFs-1	HNC NAFs-1	HNC CAFs-2	HNC CAFs-3	HNC CAFs-4	HNC NAFs-4	HNC CAFs-5	HNC NAFs-5	HNC CAFs-6	HNC NAFs-6	HNC CAFs-7	HNC NAFs-7	Normal Dermal Fibroblasts	RCC CAFs	Renal fibroblasts	RCC#229 primary	RCC#243 primary	RCC#266 primary	RCC#267 primary	RCC#278 primary	RCC#284 primary	RCC#229 CD45+	RCC#243 CD45+	RCC#266 CD45+	RCC#267 CD45+
B2-microglobulin	99.9	100	99.9	99.9	100	98.8	50.3	14	11.6	97.9	92.1	97.4	94.5	98.8	99.3	99.9	100	98.3	99.8	99.6	98.9	100	99.8	74.5	99.2	99.9	99.9	100	100	100	99.1	99.9	99.4	99.9	98.2	96.4	99.6	94.5	91.9	92.3	95.2	98.1	93.3	99.6	92.2	81.2	97.3	100	99
BLTR-1	19.8	16.7	31.2	0.0674	0.0942	0.166	0.236	0.258	0.503	0.0535	0	0.0282	0.0356	0.6	0.0416	0.888	0.247	0.0142	0.102	0	0.194	0	0.0755	0.112	0	0	0.0183	0.0317	0.0796	0	0.132	0.0543	0.0279	0.0646	0	0.139	0.0304	0	0	1.26	0.724	22.4	38.6	1.23	0.861	4.03	3.74	23.1	28
CA9	8.64	15.2	15.5	7.18	10.7	9.19	4.25	0.216	0.197	0.108	0.162	6.89	25.2	61.7	75.7	83.1	95.7	1.12	63.1	0.995	17.3	0.165	0.886	1.63	8.63	0.0588	12.3	8.73	0.715	1.06	0.644	6.44	34	1.77	2.52	23.6	0.12	32.7	0.0633	97.7	93	96.6	97.3	99.9	86.8	30.4	4.39	42.9	39.3
CD10	2.28	2.83	7.3	0.0589	0.0618	0.0891	50.6	5.27	5.88	0.547	10.2	39.4	2.55	75.1	35	91.1	82.1	3.17	0.881	16.7	3.65	99.8	0.433	5.51	74.5	99.9	99.9	99.9	99.9	99.8	97.9	99.9	93.9	99.4	65.8	98.3	99.9	40.1	29.3	60.2	91.4	87.6	89.5	99.3	70	5.95	5.1	5.73	9.69
CD100	42.3	54.1	67.8	0.0344	0.0292	0.103	0.0479	0.0955	0.0688	0.0307	0	0.243	0.0381	0.156	0.0241	0.329	0.164	0.00472	0.0179	0	0.104	0.0161	0.43	0.157	0.0114	0.0826	0.0232	0.00431	0.0105	0.015	0	0.012	0.0531	0.0295	0	0	0.00689	0	0	1.04	0.425	1.18	2.45	0.394	0.425	1.17	0.364	0.56	0.713
CD101	55.1	57.2	55.1	0.0255	0.0564	0.191	0.0571	0.116	0.292	0.0202	0	0	0	0.0461	0.0105	0.392	0.179	0.00457	0.146	0	0.0745	0	0.342	0.0818	0.0339	0	0.0172	0.00997	0.15	0.148	0	0.078	0	0.164	0.0235	0.0798	0	0.118	0	0.905	0.764	3.77	23.8	3.07	6.75	19.1	17.9	44.7	61.9
CD102	93	90.8	93.6	48.5	41.1	59.8	0.354	20.8	27.7	0.0372	0	0.63	11.9	12.2	0.827	0.498	13.6	0.15	24.5	1.26	0.216	0	0.0564	0.153	0.317	0	0.659	3.07	6.91	1.42	0.524	6.2	0.361	11.6	0.682	2.41	0.0271	37.2	0.302	6.38	1.95	6.76	10.1	47.5	1.96	38.4	33.4	68.4	43.8
CD103	1.93	1.36	2.77	0.0391	0.0376	0.0851	0.0466	0.0786	0.0789	0.0377	0	0	0.0178	0.0812	0	0.3	0.0549	0.00619	0.0101	0	0.111	0	0	0.269	0	0	0.0229	0.0107	0.0176	0.0495	0.0189	0.0373	0	0	0.0232	0	0.00504	0.0703	0.0288	0.164	0.346	2.2	0.179	0.336	0.285	2.49	4.62	6.61	6.01
CD104	17.6	5.03	13.5	98.1	98.5	99.7	0.119	0.132	0.517	0.133	12.4	38.4	25.1	95.7	62.2	16	99.8	4.73	95.3	5.32	1.11	54.1	5.28	3.46	43.4	51.2	3.36	2.05	6.71	6.51	82.9	6.59	79.2	7.5	75.6	76.6	55.1	3.53	30.6	93.8	77.9	80.9	96.8	98.6	85.5	6.09	16.8	12.2	28.6
CD105	32.3	39.4	38.4	1.34	1.2	1.45	14.9	0.691	2.6	0.0303	18.5	27.9	30.7	0.528	0.017	6.58	1.19	0.139	55.8	1.22	31.7	99	15.1	97.9	99.7	99.7	100	100	100	99.8	99.8	100	99.8	99.9	99.9	99.2	26.4	97.3	99.4	61.9	11.5	63.7	64.6	62.8	57	38.8	36	60.4	63.6
CD106	34.6	28.4	19.9	2.08	3.66	2.14	0.0788	0.209	0.248	0.678	0	2.64	0.867	42.7	6.08	6.27	3.06	1.82	79.1	15.7	15.2	0.0674	40	0.981	0.967	0.215	1.4	0.0759	2.27	0.403	0.0548	5.88	2.94	1.2	0.0442	2.67	0.0249	1.37	0.0285	13.4	22.2	4.84	29.3	39.8	1.77	2.22	3.07	4.55	12.2
CD107a	4.23	2.46	10.4	60.2	58.1	63.7	19.1	2.41	7.59	0.0937	0	0.357	0.0563	1.84	0.0426	2.09	0.457	6.39	3.15	0	0.496	0.757	0.374	0.301	0.0794	0.0791	0.76	0.178	20.8	9.56	0.232	7	0.149	4.59	0.5	0.762	0.0793	8.15	0.194	10.7	9.31	3.62	16.4	5.43	32	9.97	13.9	6.3	15.7
CD107b	7.45	16.2	11.9	6.59	8.04	24.2	0.095	0.0827	0.0953	0.0205	0.295	0.339	0.0507	0.178	0.02	0.37	0	4.93	0.301	0	0.104	0.0574	0.139	0.389	0.0207	0.157	0.0225	0.0108	0.0218	0.0792	0.0709	0.0129	0.0696	0.0329	0.0879	0.192	0.00599	1.38	0.0457	7.01	2.45	4.23	6.6	3.58	12.8	7.87	8.39	3.78	16.3
CD108	5.78	3.42	6.65	84.9	65.6	90.2	0.135	0.534	0.457	0.1	12.6	18.2	49.4	10.3	0.833	1.49	1.11	0.0449	15.5	2.34	•	70.8	•	•	69.5	1.78	27.3	87.3	23.2	28.2	34.8	56.2	28.2	86.7	98.4	75.1	13.1	81.5	50.8	0.957	0.112	2.71	3.44	2.54	0.458	2.3	1.84	3.9	3.59
CD109	26.2	18.7	18.8	0.0413	0.0489	0.215	1.03	0.0756	0.292	0.0595	1.23	0	0.0595	0.114	0.00547	0.59	6.79	0	0.226	0	0.121	0	0.185	0.251	0.0391	0.0298	0.0607	0.0904	0.112	0.0825	0.02	0.0916	0.0589	0.2	0.118	0.0754	0.268	0.111	0.0315	1.14	0.735	2.74	4.33	2.83	0.673	8.66	10.8	18.4	23.7
CD110	47.1	46.2	46.7	0.0646	0.0292	0.19	0.0639	0.0401	0.035	0.122	0	0	0	5.01	0.088	10.7	0.649	0.0047	0.0819	0	0.211	0	0.182	0.142	0	0	0.0195	0.00837	0.0548	0.0157	0.021	0.025	0.0503	0	0.0984	0.0794	0.0832	0.0944	0	54.7	3.98	48.4	57.3	59.1	6.97	40	3.83	39	35.7
CD111	18.7	22.5	29.3	26.6	27.9	25.8	63.2	96.3	97.4	0.0151	0	0.0403	0.263	3.7	0.0633	13.6	2.46	0.00458	1.73	0	0.0877	0.733	0.454	0.088	0.0346	0	0.154	31.9	0.215	0.212	0.0189	0.0788	0.0561	0.827	0.0446	0	0	14.3	0.102	16.3	20.3	12.3	28.1	55.9	27.5	4.3	2.75	16.5	14.5
CD112	24.8	11.2	14.2	0.298	0.191	2.21	0.414	0.151	0.107	0.0803	0	0.11	0.0668	0.968	0.0278	0.469	0.243	0.0329	0.465	0	0.149	0	0.064	0.0779	0.0109	0	0.0985	0.1	31	4.89	0.496	16.7	0.452	19.2	0.616	1.49	0.00957	0.237	0	50.2	0.834	16.6	18.2	56.1	0.958	32.1	1.8	13	16.2
CD114	34.1	28.6	39.9	0.495	0.339	0.714	9.56	7.83	8.05	3.16	0.106	0.536	0.19	2.98	2.65	3.67	0.887	0.0997	2.05	0	0.0848	0.0352	0.322	0.135	0.117	0	0.168	0.12	1.08	1.67	1.26	0.863	0.617	0.813	1.31	0.947	4.42	1.45	3.87	41.3	11.3	24.8	11.4	40.7	7.82	27.9	11.4	21.3	16.4
CD115	15.6	18.6	22.6	0.0494	0.0566	0.143	0.0682	0.108	0.0514	0.071	0.108	0	0.0186	0.015	0.0238	0.608	2.62	0.00892	0.00693	0	0.143	0.00758	0	0.111	0	0	0.0322	0.00578	0.17	0.0764	0	0.0894	0	0.145	0	0	0.00654	0.2	0	2.54	0.0926	11.2	0.882	20.8	9.65	35.3	1.61	7.78	3.43
CD116	39.5	8.45	5.32	98.6	98.6	97.3	31.8	4.19	8.22	1.07	1.35	2.77	3.76	3.17	0.86	1.83	0.402	0.171	5.2	0	0.169	0.239	0.685	0.231	0.588	0.316	0.258	0.376	88.2	94.9	5.1	93.1	5.57	95.1	5.36	5.45	1.1	4.25	1.03	19.8	7.27	10.9	12.4	16.9	2.62	46.2	32.9	29.8	37.3
CD117	7.93	4.83	11.4	0.781	0.366	0.81	4.72	3.62	5.3	0.46	0.308	1.36	1.91	1.23	0.389	5.54	2.02	0.157	7.77	0.134	0.0914	0.171	0.524	0.343	0.383	0.761	0.386	2.83	28.2	17.6	6	27.5	3.75	16	1.7	2.85	5.82	0.545	0.503	4.15	14	17.4	17.4	3.16	2.17	5.56	8.89	24.8	9.37
CD118	27.3	29.9	32.9	44.9	42.2	44.1	5.73	2.49	1.88	0.489	0	0.0627	0.0581	0.397	0.432	0.625	0.138	0.0317	0.643	0	0.0775	0.00785	0.133	0.11	0.0238	0.454	0.0721	7.88	16.8	4.28	0.0371	3.81	0.0815	0.472	0.0231	0.182	0.403	0.92	0.0266	12.2	2.41	26.5	42.7	44.3	31.3	8.39	5.73	34.7	30.7
CD119	16.1	63	61.6	93.8	90.6	94.2	51.4	16	40.4	5	3.15	72.2	49.4	5.17	4.49	88.8	48	0.0683	78.2	2.67	0.446	33.6	3.72	1.52	5.23	12.9	23.1	78.1	99.9	99.8	34.1	99.9	47.2	99.5	13	66.7	6.66	72.3	0.181	1.71	54.2	7.97	2.67	4.49	11.9	12.1	32.3	29	23.8
CD11a	99.8	99.7	99.6	0.0528	0.0757	0.14	0.108	0.0735	0.133	0.053	0	0	0.0359	0.249	0.0176	0.363	0.0387	0.0156	0.238	0	0.174	0	0	0.0536	0	0	0.0154	0.00525	0.102	0.183	0.0182	0.277	0.0111	0.0397	0.0435	0	0	0.0646	0	46.3	42.4	11.5	44	41.6	7.21	95.6	94.8	79.3	90.5
CD11b	50.2	41	48.2	0.146	0.0696	0.43	0.436	0.116	0.161	0.0296	0.105	0.0632	0.0957	0.63	0.0225	0.303	0	0.0199	0.407	0	0.149	0	0.132	0.186	0.0334	0	0.0563	0	0.214	0.255	0.137	0.291	0.0696	0.0359	0.0464	0.114	0.0234	0.192	0	28.5	0.821	12.4	32.3	27.7	0.915	59.6	28.5	40.3	62.7
CD11c	29.2	29.8	34.7	0.0735	0.094	0.172	0.132	0.101	0.11	0.049	0	0.0277	0.177	0.148	0.0314	2.36	0.642	0.096	0.308	0	0.416	0	0.126	0.152	0	0	0.0394	0	0.233	0.174	0.0945	0.178	0.0234	0.198	0.0695	0	0.00457	0.0895	0	2.05	5.18	4.12	16.2	2.23	2.03	40.4	24.9	32.4	58.6
CD120a	22.6	16.5	21	2.79	1.24	2.78	19.1	5.12	16.5	0.832	0.996	0.504	0.465	2.55	0.177	7.37	8.42	0.0694	38.4	0.041	0.0951	0.126	0.465	0.138	1.41	12.2	1.53	79.1	99.1	99.5	18.1	99.1	20.7	88.9	9.24	34.6	3.3	59.3	0.889	3.78	5.01	7.87	26.6	18.1	14.1	38.9	33.1	14.2	65
CD120b	4.12	9.07	15.9	5.4	1.63	10.3	0.0723	0.0933	0.092	0.0503	0.119	0	0.0602	0.302	0.0249	0.408	0.205	0.00515	1.29	0.145	0.606	0.068	0	0.816	0.0239	0.027	0.146	15.2	37.3	39.1	0.194	42.3	0.161	23.2	1.11	0.542	0.17	1.87	0.0327	2.75	1.25	6.08	14.5	2.38	2.65	3.11	2.3	7.85	7.96
CD121b	28.2	24.8	27.2	1.15	0.469	1.38	10.1	2.89	5.76	0.184	0.565	0.874	1.93	0.371	0.175	0.598	0.238	0.755	0.0908	0.148	0.273	0.0437	0.363	0.354	0.127	0.145	0.277	0.82	0.224	0.0667	0.303	0.0975	0.278	0.242	0.194	0.231	0.113	0	0	5.52	2.72	35.4	47.4	4.52	4.61	31.9	28.6	32.6	64.6
CD122	52.1	39.9	50.1	0.51	0.361	0.531	1.43	0.605	1	0.589	0	0.939	0.165	1.93	0.548	1.23	0.356	0.0447	1.82	0.0418	0.0423	0.0392	0.124	0.161	0.0418	0.0622	0.145	0.054	0.565	0.67	3.45	0.358	2.42	0.242	3.96	2.87	0.71	3.42	0.146	51.9	4.74	10.8	23.6	48	2.22	36.9	24.8	32.6	22.5
CD123	38.8	40.2	44.4	0.351	0.414	0.783	2.01	0.639	0.782	0.551	0	0.241	0.141	0.662	0.663	4.96	0.562	0.0548	0.802	0.0321	0.102	0.0489	0.31	0.209	0.0801	0.0302	0.0638	1.13	6.03	1.53	0.987	7.22	2.93	2.45	0.859	1.3	0.475	1.44	0.0581	24.6	1.8	18.5	49.1	35.8	3.23	29.6	5.31	20.5	40.9
CD124	15.3	24.3	39.7	0.061	0.0811	0.27	0.0418	0.0636	0.0436	0.0242	0.218	0	0.0534	0.0361	0.0119	0.539	0.0954	0.00477	0.433	0	0.0917	0	0.372	0.157	0.0124	0	0.0325	0.00914	0.524	4.49	0.0389	0.353	0.0116	0.213	0.024	0.0728	0.00494	0.138	0.0282	14.6	0	4.01	11	26.1	2.8	9.86	1.79	3.64	6.26
CD125	16.7	20.6	27.1	0.958	0.475	4.99	4.92	1.35	3.04	1.3	0	0.544	0.369	7.98	1.07	0.634	0.472	3.8	0.524	0.217	1.45	0.0182	1.92	1.83	0.102	0.0658	0.635	2.12	0.146	0.0742	1.56	0.117	1.41	0.0901	2.78	1.94	0.863	0.119	0	13	1.56	20.5	13.2	27.9	14.7	39.2	28.4	14.8	41.7
CD126	45.1	43.8	49.1	0.933	0.384	0.607	0.573	0.416	2.53	0.0729	0	0.0279	0.0536	0.505	0.0147	0.9	0.0771	0.00461	0.284	0	0.181	0	0.213	0.0254	0.0408	0.0232	0.0412	0.00809	5.32	2.12	0.145	1.57	0.228	1.86	0.105	0.275	0.0256	0	0	15	0.981	12.9	20.4	37.8	5.93	10.3	20.2	31.1	28.2
CD127	53.7	43.2	24.2	4.73	1.55	3.35	11.4	2.16	2.83	7.49	0.0897	0.691	0.83	10.7	6.87	5.03	0.435	0.115	3.82	0.152	0.236	0.103	0.223	0.304	0.146	0.0504	0.486	22.5	0.78	0.68	1.62	0.839	17.4	25.1	1.33	4.46	14.9	14.2	0.111	16.1	17	18	30.8	38.6	5.79	25.1	22.7	25	27.9
CD129	0.565	1.68	1.47	0.194	0.114	0.482	0.0184	0.0996	0.223	0.116	0.194	0.225	0.167	1.2	0.265	2.97	0	0.757	0.209	0.319	0.147	0	0.482	0.139	0.324	0.369	1.14	0.377	3.32	5.01	0.852	2.06	0.88	7.48	0.592	0.631	0.012	0.133	0	0.24	4.37	0.702	10.2	1.02	2.31	1.44	3.35	0.691	4.5
CD13	40.1	40.7	44.7	0.318	0.281	0.707	11.9	0.589	0.951	0.65	72.5	85.4	98	93.1	79.5	28.1	38.2	19.4	99.4	79.7	60.6	100	10.4	97.7	99.9	100	100	100	100	100	99.9	100	100	100	100	100	99.9	56.1	90.3	64.2	82.9	90.8	90.4	99.7	94	37.8	20.6	43.5	50
CD130	16.2	24.8	34.6	99.5	99	98.6	24.5	7.15	17.2	3.66	0.276	15.5	9.11	44.8	15.3	90.8	77.9	1.55	86.7	7.25	20.6	5.03	17	0.389	1.62	49.7	19.6	98.1	99.8	99.9	84	99.9	86.2	99.6	17.5	85.8	71.6	44.8	1.78	33.3	23	20.9	45.6	28.6	29.7	7.58	4.33	6.92	15.4
CD131	6.18	12.2	13.7	0.0566	0.0725	0.207	0.0761	0.118	0.127	0.0559	0	0	0	0.0366	0.0425	0.464	0.0887	0	0.0288	0	0.0748	0.00959	0	0.111	0.0207	0	0.00793	0.0082	0.0938	0.59	0	0.619	0	0.157	0.0446	0.0366	0.00797	0.0834	0	0.414	0.691	1.48	7.34	2.34	1.43	3.18	2.4	3.89	9.99
CD132	38	7.68	7.82	0.95	0.691	1.71	6.85	0.684	0.709	0.367	0.241	0.503	0.292	2.11	0.465	1.42	0.883	0.359	1.85	0.309	•	0.068	•	•	0.0973	0.0722	0.676	0.658	0.86	1.31	1.11	1.15	0.805	1.06	1.2	0.807	0.249	3.47	0.16	17.8	3.16	6.16	56.2	8.4	2.01	12.9	5.32	5.79	35.8
CD133	0.116	0.255	1.02	0.0573	0.0525	0.0886	0.0217	0.0178	0.0682	0.0255	31.3	68.9	17.4	49.9	0.0919	0.25	1.22	2.45	60.7	9.23	0.0401	0.0222	0	0.185	0	0.0336	0.0552	0.0108	0.0128	0.0364	0	0.0593	0.0133	0	0	0.0913	0	0.113	0	1.54	0.508	0	0.355	1.41	4.68	2.39	0.329	1.28	1.54
CD134	43.4	0.123	21.6	0.184	0.205	0.283	0.34	1.4	1.92	0.0711	0	0.122	0.435	0.577	0.241	19.5	1.27	0.0481	5.02	0.109	0.132	0.0088	0.121	0.2	0.0114	0	0.0777	0.0456	0.124	0.0411	0.0198	0.0113	0.129	0.107	0.139	0.112	0.0157	0.146	0	55.8	1.21	12.9	19.6	38.3	0.911	40	2.36	11.3	9.75
CD135	28.4	40.3	26.6	0.0985	0.0928	0.239	0.0837	0.0963	0.0697	0.0483	0	0.0351	0	0.255	0.19	0.373	0.0765	0.00547	0.433	0	0.144	0.00952	0.0613	0.133	0	0	0.0234	0.00447	0.145	0.281	0.118	0.273	0.0569	0.031	0.0451	0.11	0.00576	0.313	0	39	0.231	9.95	19.6	26.2	0.782	25.7	1.99	9.84	12.4
CD136	5.23	6.22	15.2	82.9	81.1	76.7	36.7	39.7	44.3	0.0545	0	3.71	45.9	8.05	0.0173	0.403	0.453	0	61.8	0	0.391	0	6.27	0.4	0.0479	0	0.0153	0.0952	6.25	2.42	0.0767	4.53	0	8	0.144	0.224	0.0518	0	0.0327	3.18	5.53	1.99	17.8	2.1	4.46	2.24	5.28	1.82	23.3
CD137	5.24	0.606	6.19	0.714	1.03	1.71	0.112	0.0506	0.0693	1.88	0.108	0.031	0.0183	0.15	0.0116	1.03	0.104	0.019	0.165	0.152	0.12	0	0.31	0.177	0	0.0466	0.00792	0.00866	0.0632	0.15	0	0.0474	0	0.0874	0	0.037	0	0.0251	0	1.48	0.598	2.42	6.47	1.33	0.419	3.45	6.5	6.63	3.87
CD137L	49.1	24.5	17.7	0.987	0.473	1.1	6.83	3.34	5.69	0.187	0	1.01	0.846	6.19	0.117	3.38	0.354	0.601	0.791	0.132	0.376	0	0.34	0.527	0.163	0.155	0.3	0.628	0.504	0.175	1.97	0.302	1.34	0.281	3.63	3.68	0.0411	14.3	0.252	28.6	2.16	38.3	53.8	11.1	14.2	18.7	3.5	34.9	38.9
CD138	0.426	1.79	6.35	0.0508	0.0583	0.178	0.0666	0.048	0.0883	0.0328	0	0.108	0.0342	0.496	0.0257	0.507	0.254	0.00932	0.0719	0	0.174	0	0.194	0.184	0.00988	0	0.0158	0.00475	2.4	1.02	0.0189	0.612	2.15	2.05	0	1.8	0.0262	0.197	0	0.88	0.485	1.15	1.9	1.14	0.735	2.03	2.02	0.639	3.57
CD14	42.5	47.9	52.5	0.275	0.235	1.07	4.17	0.122	0.0794	0.0812	0	0	0.0338	0.467	0.0124	0.493	0	0.389	0.334	0	0.067	0	0.297	0.0515	0.13	0	0.0188	0.0283	0.932	0.721	0.184	0.516	0.0228	0.803	0.0431	0.109	0.00477	0.442	0.129	27.2	1.7	9.54	28.1	51.6	18.7	48.3	31.8	33.3	62.1
CD140a	1.08	0.35	1.77	0.0363	0.0459	0.155	0.0379	0.127	0.179	0.0729	0	0.0316	0.0373	0.0188	0.00643	0.466	0.137	0.00452	1.55	0	2.97	14.8	0.416	0.818	1.37	20.8	39.8	94.9	97.8	98	33.3	98.3	73.8	97.4	2.61	85	11.3	65.7	0	0.0603	0.24	1.5	1.24	0.248	0.218	1.51	2.52	0.974	3.42
CD140b	18.5	27.8	18.9	0.261	3.18	0.175	0.567	0.197	0.158	0.0832	0.574	0.555	0.483	0.578	0.0696	0.664	0	0.00956	4.72	0.0285	0.126	97.5	0.466	24.7	99.4	97.9	99.9	99.9	99.9	99.4	98.4	99.9	99.7	99.5	99.6	97.7	99.6	91.1	73.5	11	3.17	12.4	25	21.8	5.98	12.1	2.73	15.9	17.8
CD141	16.2	26.7	17.1	99.7	99.8	99.6	0.0996	0.0797	0.107	0.0888	0.344	4.33	41.5	9.88	16.7	98.9	88.5	0.0418	95.4	0.27	1.65	1.15	25.4	77.7	0.0559	0.253	1.47	10.3	22.8	6.78	1.19	11.6	9.57	92.8	0.157	4.09	2.58	1.44	9.13	2.92	43.2	3.67	48.9	42.7	15.6	22.1	15	19.8	36.7
CD142	4.48	1.5	6.62	98.8	98	99.4	12.1	74.4	91.2	0.14	0.235	0.0933	10.8	8.58	0.752	11.2	21.9	0.016	10.4	0.126	19.9	78	19.4	4.07	37.2	22.4	66.4	98.8	73.6	81.4	58	94.7	83.3	96.3	50	48.9	10.8	69.1	38.1	3.87	6.01	0.901	16.2	2.58	2.18	3.13	1.6	0.868	7.98
CD143	20.9	19.6	29.5	0.0892	0.0636	0.468	26.6	16.9	19.9	0.0617	0.231	0.0996	0.144	0.0305	0.0513	0.371	0.258	0.00457	7.24	0.0497	0.387	0.676	0.227	1.16	4.44	15.4	13.6	1.45	57.4	33.7	2.82	53.8	3.81	37.2	7.45	5.65	2.62	0.231	14.5	2.22	2.74	18.1	34.7	17.1	11.5	33.1	29.7	15.5	65.7
CD144	1.76	0.152	1.12	0.0535	0.0407	0.126	0.0461	0.0587	0.0443	0.0393	0	0	1.08	0.0934	0.00585	0.182	0.0565	0.00462	0.199	0.038	0.16	0.00817	0.0716	0.149	0.0104	0.023	0.0653	0.0246	0.14	0.197	0	0.0577	0	0.0593	0	0	0	0.117	0	11.1	0.613	2.96	1.82	5.57	2.75	6.13	1.47	0.574	3.43
CD146	1.62	1.58	2.04	95.4	95.9	96.7	0.189	11.3	5.4	55.1	56.6	85.7	64.6	82	79	7.53	92	91.6	89.8	43.7	1.63	43	6.54	94.3	13.7	10.5	26.7	46.7	49.9	10.9	0.902	34.6	8.9	36.3	0.445	20.5	4.86	25.8	3.83	34.9	25.3	31.2	66.4	36.9	62.5	21.4	11	12.1	20.7
CD147	92.2	95.9	94	100	100	99.6	99.9	99.9	99.9	98.7	53.3	67.1	88.8	97.7	99.9	100	100	78.5	99.8	83.7	98.8	99.9	99.6	99.4	100	99.9	100	100	99.9	99.9	99.8	99.9	99.8	99.8	99.8	98.9	99.9	96.7	96	99.8	96.1	97.1	97.9	100	92	67.5	90.9	93.2	90.9
CD148	65.2	68.9	77.7	99.9	100	99.6	48.5	87.8	92.9	84.5	73.2	95.5	99.1	98.8	96.7	99.9	96.7	91.8	77.7	90	37.9	65.2	86.6	4.59	1.35	0.78	6.54	30.9	79.9	75.5	13.7	87.4	31.9	97.1	7.9	21.2	2.46	68.8	0.409	79.1	73.8	30.6	51.7	90.1	61.4	73.5	91.7	91	90.8
CD15	0.167	0.186	0.56	0.0343	0.0199	0.238	1.8	0.133	0.0169	0.0548	0	1.82	6.79	1.25	0	0.584	0.0665	0	0	0.203	0.19	0	0.23	0.128	0	0	0	0.0113	0.0658	0.121	0.0138	0.0111	0.00851	0.219	0.0171	0	0.00546	0.0798	0.043	3.02	20	23.2	1.46	12.3	11.2	1.88	2.24	2.32	1.8
CD150	3.02	5.04	12.5	0.0542	0.0421	0.116	0.0504	0.0623	0.109	0.071	0	0	0.0234	0.108	0.032	0.398	0.0636	0.00965	0.0699	0	0.169	0	0.246	0.102	0.0241	0	0.0158	0.00396	0.019	0.0677	0.0207	0.0221	0	0	0.0245	0	0.0309	0	0	2.7	0.56	1.24	11.7	4.13	1.42	25.6	7.01	2.51	19.3
CD151	25.2	22.5	15	88.8	93.4	88.3	99.9	100	99.9	94.5	65.4	76.8	47.1	94.2	95.6	99.6	99.5	92.3	88	25.1	87.3	98.2	96.7	96.2	99.8	99.6	100	100	100	99.9	98.7	100	99.8	100	98.7	98.5	99.6	96	97.1	93	98	100	97.9	100	93.6	74.9	48.5	70.8	66
CD152	30	31.3	50	0.243	0.172	0.386	1.37	0.138	0.108	0.0331	0	0.106	0.0219	0.619	0.0365	0.46	0	0	0.325	0	0.205	0.00797	0.0714	0	0.0793	0.0373	0.0334	0.0261	0.815	0.978	0.349	0.613	0.408	0.707	0.132	0.458	0.0798	0.178	0	24.9	0.461	18.9	38	46.1	6.18	17.6	2.32	19.7	25.9
CD153	31.1	31	34.1	1.12	0.634	0.97	4.11	2.88	4.47	0.336	17.9	3.91	2.96	10.5	0.286	0.608	18.1	11.6	0.356	0.462	0.219	0.231	0.865	1.01	0.327	0.581	0.484	1.11	20	8.26	8.8	3.54	8.27	4	11.8	14.8	0.598	0	0.131	7.55	13.1	25.7	35.9	2.21	11	33	24.5	50	57
CD154	2.01	6.02	7.36	0.0507	0.055	0.173	0.0365	0.0467	0.102	0.00809	0	0	0.0214	0.075	0.00633	0.372	0	0.00939	0.0519	0	0.106	0.163	0.149	0.187	0	0	0.0518	0.0208	3.64	3.55	0.475	3.24	0.705	3.59	0.47	0.947	0.0524	0.0999	0.0799	0.36	0.836	1.12	5.49	2.55	0.589	2.06	1.82	0.725	4.84
CD155	5.34	37.1	42	100	100	99.8	100	100	99.9	100	95.7	96.5	99.3	99.6	100	99.9	99.9	73	61	99.4	56.5	99.4	94.8	99.1	99.5	92.6	100	100	100	100	99.9	100	99.9	99.9	100	99.5	93.7	96.8	72.7	12.4	28.7	65.2	81.3	23.3	72.6	1.83	5.68	45.4	49.2
CD156b	44	44.2	47.2			14.4	59.6	32.4	64.3	9.11	2.03	2.35	1.84	28.3	11.3	99.8	68.3	2.95	97.1		1.51	0.766	3.74	1.41	1.41	0.937		5.75	95.9	95.8	17	96.7	38.1	80.9	14.8	8.39	5.53	35.1	5.47	66.9	55.4	44.5	65.1	77.7	57.9	53	33.6	56.7	72.4
CD157	6.96	23.4	6.33	1.3	0.568	8.05	0.775	0.0801	0.0513	0.076	0.828	0.233	1.26	1.66	0.281	13	75.7	0.405	3.4	0.852	1.53	7.79	4.72	4.6	34.2	12.4	86.5	20.5	81.3	93	87.1	93.9	92.3	73	56	28.1	3.96	72	56.5	4.97	31	3.68	8.94	76.7	2.4	15.3	16.3	19	35.4
CD158a	1.04	2.61	7.8	0.41	0.814	0.767	0.0185	0.0525	0.0946	0.0405	0	0	0	0.106	0.00582	0.328	0.147	0.00471	0.0338	0	0.181	0.00948	0.186	0.214	0.012	0	0.0276	0.96	1.07	1.25	0.235	1.39	0.273	1.75	0.0241	0.0771	0.0987	0.153	0.131	5.77	0.539	0.792	1.47	0.685	0.141	4.51	1.23	0.394	2.48
CD158b	4.05	3.72	10.1	0.0219	0.0607	0.0878	0.0461	0.0916	0.0808	0.0308	0	0	0.0371	0.0313	0.0113	0.337	0.111	0.00453	0.0126	0.0754	0.116	0	0	0.135	0.0315	0.0224	0.11	0.0365	0.082	0.0929	0	0.033	0.0118	0.0511	0.0231	0	0	0.0341	0.0323	2.43	0	0.351	1.86	0.678	0.262	3.27	2.95	6.51	5.67
CD158b2	23.9	5.68	11	0.899	0.282	8.05	0.127	0.0763	0.0737	0.106	0	0	0.045	0.358	0.0195	0.366	0	0.109	0.129	0.0669	0.086	0.00949	0	0.0272	0.0137	0	0	0.102	18.5	2.51	0	16.2	0.0565	38.6	0.0884	0.0466	0.0337	0.257	0	27.6	1.28	3	18.7	53.3	3.82	18.5	4.4	10.6	20.3
CD158d	17	12.2	23	0.145	0.0953	0.557	0.302	0.155	0.296	0.149	0	0	0.286	0.106	0.127	0.337	0.0644	0	99.9	0	0.0561	0	0.0806	0.112	0.0222	0	0.0082	0.00776	0.243	0.114	0.274	0.0815	0.432	0.0586	0.0892	0.316	0.0738	19.6	0	0.922	0.244	12.3	19.2	21.8	19.5	6.27	3.11	29.2	37.1
CD158e2	5.43	9.12	8.38	0.293	0.127	0.384	0.0277	0.0573	0.0739	0.0884	0.329	0	0.0359	0.373	0.059	0.354	13.3	0.0231	0.382	0.0303	0.105	0	0.248	0.237	0	0	0.112	0.02	0.455	0.0969	0.0396	0.202	0.0344	0.191	0.0225	0.261	0.0203	0.0385	0	3.36	0.38	1.11	6.18	1.11	0.491	3.18	1.52	1.1	4.6
CD158f	15.8	12.8	29.5	0.16	0.213	0.39	2.9	0.122	0.184	0.0523	0	0.0686	0.0442	0.714	0.0371	0.748	0.485	0.00938	0.19	0	0.14	0.0115	0.161	0.113	0.022	0	0.0409	0.0205	3.88	4.29	0.126	1.94	0.0705	9.56	0.0453	0.176	0.00612	0.0924	0	0.444	0.552	29.4	44.9	22.7	29.2	1.73	2.39	29.8	29.1
CD158i	18.7	15	31.7	0.248	0.128	0.276	3.49	0.169	0.206	0.101	0.973	0.197	0.392	0.298	0.086	0.852	0	0.0089	0.901	0	0.129	0	0	0.181	0.0426	0.395	0.00804	0.00757	0.544	0.617	0.409	0.33	0.584	0.248	0.428	0.499	0.0835	1.36	0.167	0.788	0.754	20.5	26.6	27.9	24.4	1.94	2.42	20.2	16.3
CD159a	18.7	17.3	22	1.06	0.175	0.587	1.21	0.105	0.121	0.417	0	0.135	0.0425	0.232	0.312	0.426	0.0357	0.0496	0.167	0	0.145	0.018	0.213	0.135	0.0652	0	0.201	0.0949	0.351	0.145	0.0792	0.175	0.0483	0.237	0.0681	0.11	0.157	0.327	0	3.71	1.26	10.6	11.1	6.81	9.2	8.34	10.2	33.7	37.9
CD159c	0.23	7.28	11.6	0.176	0.136	0.411	0.282	0.936	1.92	0.323	0	0.141	0.262	1.72	0.235	0.555	0.136	0.0454	0.727	0	0.502	0.00826	0.556	13.4	0.0353	0	0.0326	0.0333	4.62	4.46	0.933	2.17	33.9	32	0.323	45.7	0.375	0.128	0.204	0.182	0.723	8.82	20.7	0.519	2.92	1.9	27.5	10.1	56.5
CD16	40.1	40.4	47.7	1.2	0.393	1	0.824	0.674	0.977	0.0742	0.102	0	0.0357	0.66	0.114	0.337	0.137	0.00539	0.0996	0.125	0.217	0.0252	0.124	0.136	0.29	0.228	0.25	0.502	3.44	3.22	0.2	3.35	0.14	3.87	0.119	0	0.0776	0.195	0	32.6	4.03	13	51.2	3.31	2.03	30.3	15.2	32	52.1
CD160	64.2	29.7	27.9			0.174	0.0282	0.151	0.282	0.0286	0	3.79	0.257	11.3	0.0834	0.294	0.243	0.235	0.0811		0.181	0	0.75	0.494	0	0		0.00977	0.124	0.12	0.108	0	0.228	0.109	0.13	2.14	0.031	5.09	0.0527	0.296	0.347	0.556	0.657	0.716	0.459	2.1	0.353	6.98	1.34
CD161	21.9	28.8	44.6	0.0616	0.13	0.258	0.0941	0.0982	0.14	0.0396	0	0	0.0222	0.492	0.0116	0.505	0.122	0.00463	0.373	0	0.122	0	0.127	0.0778	0.0102	0	0.0158	0.00443	0.12	0.0575	0.0372	0.0115	0.0341	0	0	0.035	0.0227	0.111	0	38.7	0.586	7.59	18.6	27.7	3.92	32	5.4	19.9	22.4
CD162	87	87.2	90	27.1	52	39	0.338	7.06	7.55	0.739	0.938	0.116	0.0676	1.88	0.0747	83.3	74.1	0.036	0.846	0	0.404	1.69	8.13	0.341	0.044	0.0384	0.974	22.7	79.3	30.2	1.43	55.3	2.64	68.2	1.36	3.7	2.73	4.14	0.191	1.41	1.87	3.57	39.6	1.91	1.47	8.87	11.6	63.4	25.2
CD163	0.259	1.09	2.7	0.0546	0.0542	0.104	0.0978	0.0852	0.0637	0.0295	0	0.122	0.0732	0.143	0	0.366	0.273	0	0.197	0	0.085	0	0.136	0.157	0.0297	0	0.024	0.0096	0.102	0.0876	0.04	0.059	0.0719	0	0.0691	0.153	0.0106	0.0342	0.0304	0.225	0.576	0	2.59	0.593	0.579	1.52	2.83	2.52	12.6
CD164	24.5	29.8	48.6	96.2	89.2	97.4	82.4	17.7	51.9	0.0898	0.268	0.13	0.214	11.7	0.0975	2.48	48	0.125	53.5	0	0.32	0.841	0.212	0.294	0.379	0.452	1.21	28.5	60.7	62.8	9.77	50.6	2.98	53.1	2.24	8.07	2.15	12.4	0.0997	99.4	80.6	76.2	93	97.9	91.7	88	52.3	29.6	52.7
CD165	2.36	2.92	4.66	0.0436	0.0472	0.221	0.0427	0.474	0.53	0.0237	0	0	0	0	0.00606	0.368	0.179	0.00456	3.39	0	0.0988	0	0	0.285	0.0309	0.233	0.249	0.461	54.7	46.7	0.231	32.2	0.546	41.8	0	0.725	0.0254	2.89	0.331	0.486	0.199	1.16	1.58	0.664	2.66	11.6	2.32	0.524	5.53
CD166	9.25	23	31.5	99.9	99.7	99.6	99.9	98.7	99	85.4	27.3	79.5	87.7	97.7	67.9	99.5	100	71	99.9	42.6	0.798	98.3	4.65	79.5	72.7	93.4	100	100	99.9	98.8	96	100	99.9	100	99.8	99	43.1	86.6	67	98.1	53.3	97.3	97.2	99.2	71.7	38.7	18.9	17.7	44.7
CD167	7.66	3.85	10.4	0.384	0.198	0.718	1.02	3.3	6.06	0.205	0.596	0.243	0.363	0.191	0.294	34.7	8.37	0.117	0.0475	0.179	0.125	0.0082	0.164	0.0869	0	0	0.124	0.0891	0.44	0.327	0.0777	0.226	0.253	0.314	0.139	0.156	0.134	0.242	0	2.77	2.14	1.06	6.06	2.02	2.17	2.1	5.1	0.603	9.87
CD169	22.5	31.9	16.7	0.149	0.117	0.187	0.075	0.0857	0	0.0878	0.208	0.299	0	0.116	0.0363	0.262	2.51	0.0141	0.131	0	0.14	0.0152	0.101	0.0586	0.0117	0.0275	0.112	0.0356	0.0103	0.0293	0.0232	0.0356	0.096	0.0308	0.0813	0.0436	0.011	0.529	0	46.6	0.795	5.65	7.78	1.75	2.56	38	4.63	11.2	13
CD16b	1.21	0.844	1.39	0.0459	0.0383	0.116	0.0892	0.0928	0.0833	0.0898	0.131	0.149	0.0537	0.272	0.109	1.66	0.12	0	0.0327	0.112	0.2	0.0261	0.24	0.135	0.36	0.897	0.0385	0.916	12.1	11.2	0.108	11.2	0.0506	7.84	0	0.0828	4.39	0.0714	0.301	0.795	2.58	3.97	8.57	0.566	0.509	2.3	2.09	1.63	3.58
CD17	0.697	25.7	37.8	0.0921	0.075	0.276	0.158	0.35	0.78	0.111	0.602	0.726	0.383	7.01	0.061	0.489	0.547	0.669	0.613	0.0406	0.281	0.03	0.418	0.351	0.0355	0.0557	0.0682	0.0655	0.0203	0	1.49	0.0426	1.87	0	3.14	5.8	0.0291	0.534	0.175	0.795	2.41	3.93	12.4	0.28	4.89	1.48	1.31	1.93	8.54
CD170	37.8	27.1	33.8	70.3	1.76	0.453	0.254	100	99.9	0.00805	12.3	0.217	0.304	0.394	0.00605	98.8	99.7	3.56	39.4	0.314	0.0806	0.0226	0.0884	0.488	1.56	0.393	0.0237	0.247	0.748	0.674	7.63	0.538	11.8	1.41	2.63	6.41	4.99	0.196	13.4	4.12	2.44	14.5	40.4	19.6	3.29	49.2	27.3	28.9	59.9
CD171	6.38	6.89	13.9	79.1	92	85.5	0.0879	1.61	0.538	1.66	1.07	40	1.77	49.5	0.397	2.93	78.4	0.209	56.1	6.02	0.179	19.9	0.0725	0.324	0.0456	0.0313	0.00804	0.589	1.04	0.548	0	0.602	0.0123	0.545	0.0241	0	0.262	0.367	0	0.396	1.11	4.53	18.9	2.8	1.82	2.3	3.5	19	11
CD172a	42.1	15.5	27.6	0.898	0.22	0.795	0.173	0.179	0.367	99	43.4	60.6	4.41	96.4	99.9	99.9	98.8	0.547	88.3	5.94	95.7	1.15	98.5	48.1	49	76.4	99	7.16	98.4	69.1	5.29	99.9	88	99.7	0.0944	0.697	1.57	62.6	0.148	99	89.8	97.6	96.3	99.7	65.1	87.4	37	51.3	77.9
CD172b	19.7	14.7	27.2	0.055	0.0635	0.198	0.0699	0.0529	0.0783	0.0484	0	0	0.0275	0.076	0.00601	0.415	0.107	0.00486	0.127	0	0.206	0.00845	0.118	0.281	0	0	0.00888	0.0118	0.0382	0.0818	0	0.0548	0.0124	0.0273	0	0	0.0247	0.204	0	8.22	0	0.699	4.75	0.708	0.232	9.99	3.92	2.87	16.5
CD172g	52.6	51.9	62.5	0.127	0.132	0.211	4.87	0.0936	0.112	0.0482	0	0	0.0363	0.149	0.0563	0.552	0	0.00475	0.0733	0	0.147	0	0.0845	0.154	0	0	0.0164	0.0126	0.058	0.0166	0.0395	0.0378	0.037	0.256	0.0228	0	0	0.159	0.0405	1.39	0.349	8.77	30.3	20.9	19.4	36.2	18.3	41.9	37.3
CD175s	35.1	47.8	63	8.3	6.83	39	84.9	31.4	38.3	1.06	0.255	0.707	0.327	9.99	1.88	59	78.5	8.61	49.3	0.081	0.113	56.9	0.608	2.47	79.4	87.6	91.8	79.2	69.6	70.9	35.1	74.5	37.2	51.1	28.9	44.7	49	59.5	5.18	57.5	30.3	66.1	62.8	80.6	75	52.9	22.6	40.2	56.1
CD177	6.63	5.06	10.1	0.484	0.356	0.435	0.085	0.0886	0.0803	0.0477	0	0.619	12	1.59	0.0702	0.974	2.09	0	0.283	0	0.236	0.0348	0.215	0.0858	0.0111	0.0867	0.0105	0.149	0.242	0.258	0.481	0.46	0.577	1.18	0.693	0.467	0.165	0.0822	6.61	0.839	0.527	1.12	14.8	1.78	1.1	2.87	2.32	2.82	7.31
CD178	21	24.3	30.3	0.162	0.0978	0.227	0.176	0.127	0.148	0.0445	0	0.03	0.0193	0.16	0.00894	0.892	0.126	0.00454	0.207	0	0.0454	0.00877	0.211	0.103	0.0104	0	0.025	0.0125	4.33	3.56	0.0981	2.1	0.0582	29.4	0.0704	0.11	0.0637	0.178	0.034	9.59	0.533	25.6	36.7	15.2	12.5	6.59	1.59	20	24.5
CD179a	24.1	11.2	30.2			5.1	0.509	0.424	0.412	1.05	0.518	0.22	0.263	1.68	1.33	35.2	2.73	0.596	1.13		0.511	0.0223	0.366	0.247	0.0886	0.0816		0.142	0.817	0.808	0.944	0.741	0.612	0.541	0.785	0.941	0.219	11.2	0.145	1.74	33	25.7	37.1	18.3	14.8	2.11	4.3	24.9	30
CD18	86.2	88.4	91.7	0.45	0.385	0.517	0.0482	0.0615	0.266	0.0157	0	0	0.0694	0.0693	0.00614	1.6	0.224	0.0051	0.237	0	0.166	0	0.242	0.157	0.0201	0	0.0222	0.00453	0.0489	0.0554	0	0.0229	0.0117	0	0.0228	0	0	0.0396	0	11.6	7.08	18.3	31.1	7.79	3.19	94.6	96.2	95.4	96.6
CD180	32.6	34.7	41.3	0.0662	0.0626	0.114	0.104	0.105	0.0619	0.0158	0	0	0	0.0357	0.012	0.223	0.169	0.00469	0.308	0	0.159	0	0.417	0.18	0.0602	0.0639	0.1	0.0435	0.114	0.0676	0.0193	0.0675	0	0.054	0.0233	0.0376	0.00632	0.0743	0	5.4	1.72	4.12	8.76	0.882	1.07	62	33.1	31.3	49
CD181	36.2	38.5	46.2	0.651	0.646	14.4	11.3	2.63	2.75	1.87	0.178	0.764	1.03	5.56	1.24	1.65	0.786	0.226	18.2	0	0.178	0.139	0	0.262	0.749	0.179	0.301	0.175	1.23	2.08	1.85	1.08	1.25	0.661	1.72	1.6	2.89	33.7	0.394	45.7	8.09	47.5	44	23.9	4.5	31.7	7.27	36.4	31
CD182	24.4	29.8	44.6	0.294	0.316	0.608	2.15	0.124	0.254	0.0782	0	0.0403	0.0726	1.16	0.0525	2.55	2.49	0.0415	0.993	0	0.138	0.0238	0.121	0.101	0.0888	0.0677	0.604	0.0668	0.27	0.228	0.12	0.107	0.136	0.118	0.169	0.0384	0.0599	0.369	0	1.69	4.83	37.7	1.92	1.4	4.8	2.45	4.32	21.6	4.13
CD183	41.4	18	51.2	0.278	0.104	0.389	0.415	0.215	0.205	0.0255	0.117	0.954	1.59	2.62	0.0454	1.41	0.961	4.75	0.543	0	0.148	0	0.131	0.127	0.0264	0	0.126	0.0652	0.644	0.459	4.12	0.467	3.13	0.536	5.67	3.77	0.0135	0.508	0	5.06	0.231	21.6	27.5	2.97	1.07	10.7	3.92	33.5	22
CD184	32.7	40.7	49.9	6.44	3.17	12.1	0.423	1.88	5.88	0.0771	0.254	0	9.67	37.3	2.91	3.13	0.564	0.00925	4.03	0	0.118	0.00747	0.205	0.0255	0.0832	0.0486	0.149	0.0207	0.155	0.0619	0.15	0.0385	0.0356	0.0617	0.0674	0	0.00632	2.09	0	98.1	16.2	19.2	63.5	92.2	66.6	90.4	24.1	38.1	69.8
CD185	33.4	37.4	62.9	0.12	0.0788	0.993	0.256	0.0659	0.111	0.107	0	0.182	0.0528	0.199	0.0405	0.227	6.9	0.00452	1.6	0	0.398	0.025	0.557	0.106	0.222	0.0338	0.0109	0.0543	0.0374	0.162	0.209	0.104	0.3	0.161	0.508	0.18	0.00534	0	0	15.2	0.882	24.3	22.8	21	20.1	26	1.69	20.6	18.5
CD186	21.9	38.6	3.77	0.139	0.135	0.233	0.0305	0.0716	0.125	0.0331	0.418	0.757	0.268	3.76	0.0442	0.3	0.363	0.149	0.147	0.133	0.147	0.0593	0	0.316	0.0118	0.057	1.82	0.0158	0.211	0.851	1.38	0.0903	1.89	16.5	1.05	1.18	0.00836	9.5	0.289	0.458	0.702	0.977	0.468	0.855	4.85	4.06	0.219	2.85	6.6
CD19	15.8	13.7	19	0.0338	0.0362	0.128	0.0656	0.0858	0.0252	0.0408	0	0	0.0345	0.0311	0.00614	0.243	0.0405	0	0.0272	0	0.0885	0	0	0.212	0.0113	0	0.0314	0.0246	0.0665	0.0394	0.0192	0.0666	0	0.0277	0	0	0.00499	0.0387	0	1.03	0.85	1.89	11.1	1.21	0.101	21.1	3.37	0.995	7.04
CD191	7.68	11.5	19.4	0.122	0.0689	0.432	0.149	0.342	0.39	0.038	0.105	0.196	0.0898	0.179	0.0282	0.561	0.148	0.00461	0.165	0	0.0169	0.0083	0.0736	0.0862	0.0415	0	0	0.0122	0.306	0.398	0.132	0.202	0.161	0.333	0.175	0.322	0.0119	0.225	0	5.27	0.458	9.15	10.5	11	6.68	7.52	11.4	20.9	32
CD192	12.9	22.3	12.7	0.0753	0.116	0.209	0.00914	0.0496	0.0415	0.0184	0	0.122	0.0201	0.386	0.0236	0.214	0.653	0.102	0.116	0.4	0.0631	0.0301	0	0.232	0	0	0.0231	0	0.0236	0.0851	0	0	0.0137	0.0346	0	0.134	0.00602	0.376	0.0449	0.355	0.87	0.415	0.755	1.01	0	3.89	0.172	2.69	3.02
CD193	48	32.6	4.76	0.133	0.0898	0.15	15.9	1.27	1.45	0.666	1.3	0.888	0.663	5.79	0.685	3.86	0.531	0.00552	2.98	0.188	0.118	1.78	0.0644	0.0989	1.94	1.56	0.0612	0.0808	1.14	1.02	2.17	1.01	1.58	0.925	2.45	1.71	0.91	13.3	0.534	61.9	15.4	50	35.8	65.3	8.17	49.1	11.8	37.4	25.4
CD194	11.4	12.6	14.8	0.143	0.312	0.331	0.149	3.3	3.49	0.146	11.1	17.4	5.9	32.1	0.117	0.22	0	16.2	0.853	0.395	1.1	1.08	0.139	1.49	0.132	0.189	1.97	0.115	9.81	6.76	4	2.08	2.97	21.8	5.21	4.8	1.47	24.9	0.042	0.419	1.02	3.03	0.187	1.98	2.83	2.61	1.67	8.89	2.12
CD195	2.67	5.74	8.76	0.379	0.0494	0.569	0.161	1.68	2.24	0.166	0	0	0.0404	0.262	0.104	1.13	0	0.143	0.145	0.18	0.0716	0	0.283	0.726	0.0346	0.0837	0.499	0.188	3.01	2.63	0.617	2.64	0.696	3.88	0.577	0.664	0.27	0.0928	0	1.79	0.946	14.3	15.9	5.8	2.07	27.8	43	40.2	54.6
CD196	46.7	42.3	44.6	0.0439	0.0974	2.71	6.61	0.801	0.955	0.987	1.53	0.751	0.638	1.96	0.936	2.78	0.966	3.15	2.29	0	1.45	0.307	1.76	2.06	1.48	1.39	0.00951	2.02	0.61	0.455	1.05	0.391	0.816	0.403	1.11	0.963	0.443	3.61	0.032	42	1.55	6.9	2.66	25.8	3.53	33.8	2.52	5.01	4.74
CD197	1.02	2.19	8.6	0.0367	0.0517	0.129	0.0565	0.0454	0.0705	0.0315	0	0.0704	0	0.717	0.0296	0.0786	0.109	0.00936	0.00702	0	0.132	0.0128	0.125	0.0781	0	0	0	0.00439	0.064	0.104	0.0217	0.0431	0	0.155	0.0474	0	0	0.0571	0.0573	0.586	0.193	0.543	1.69	0.571	0.62	2.91	2.2	0.505	4.45
CD1a	0.36	0.204	0.41	0.0338	0.0336	0.138	0	0.056	0.0116	0.0286	0	0.0292	0.017	0.0407	0.0109	0.158	0.0868	0.265	0	0	0.493	0.00923	0.265	0.392	0.0489	0	0.0141	0	0.0198	0	0	0.0224	0	0.0579	0	0.0787	0.00666	0.1	0.0316	0.394	0	0.82	1.8	0.448	0.364	2.07	1.46	0.912	2.89
CD1b	0.274	6.92	10.8	0.791	0.585	1.39	0.0441	0.0973	0.0993	0.0342	0	0.178	0.019	0.553	0.00624	0.284	0.232	0	4.95	0	0.081	0.0207	0.105	0.192	0.43	0.201	0.0761	0.114	0.543	0.651	0.335	1.77	0.25	0.44	0.424	0.503	0.00532	0.0819	0	0.581	0.749	6.09	5.2	0.302	3.85	2.29	1.63	2.1	5.59
CD1c	12.2	17.6	25.1	0.0769	0.11	0.349	0.199	0.296	0.28	0.0194	0	0.0442	0.0276	0.177	0.0097	0.392	0	0.0358	0.233	0	0.0865	0.0541	0.0864	0.131	0.139	0.159	0.465	0.0681	0.476	0.506	0.0874	0.317	0.0134	0.0784	0.057	0.0482	0	0.0772	0	1.42	0.574	4.32	8.29	6.98	1.87	21	5.37	6.92	12.4
CD1d	21.9	18.1	16.9	0.0469	0.0385	0.186	0.184	0.0694	0.0278	0.0273	0	0	0.0723	0.0844	0.0103	0.29	0	0.0106	0.0436	0	0.15	0	0	0.113	0	0	0.0134	0	0.0898	0.268	0	0.0353	0.0113	0.0283	0	0	0	0.0668	0.134	0.317	0.465	1.23	15.4	0.7	0.101	18.8	10.6	6.68	26.6
CD2	76.8	75.9	78.3	1.19	0.754	1.82	0.534	1.05	0.657	0.0656	0	0.0262	0	0.0706	0.0135	0.244	0.109	0.094	0.0274	0	0.199	0	0.126	0.139	0	0	0.027	0.38	0.439	0.436	0.482	0.474	0.353	0.0313	0.357	0.185	0.0239	0.0273	0	25	17.1	7.83	21.8	49.9	8.87	100	64.5	50.7	48.4
CD20	7.25	8.02	12.2	0.0382	0.0425	0.104	0.0991	0.0513	0.0185	0.0152	0	0	0.0517	0.0156	0	0.255	0.146	0	0.0213	0	0.126	0	0.135	0.132	0.0102	0	0.0395	0.0138	0	0.0713	0	0.0347	0	0.0297	0.0464	0	0	0	0	0.139	0.336	1.63	0.758	0.189	0	12.5	2.76	0.398	2.68
CD200	1.72	1.78	8.26	0.0741	0.064	0.069	0.0934	0.0672	0.125	0.103	0	0	0.258	33.6	13.2	0.328	0.129	0.0322	42.3	0.0616	17	0.159	56.9	0.304	1.15	0	0.982	0.0117	0.115	0.0728	0.58	0.0718	1.35	0.0595	0.0918	0.112	0.0163	4.61	0.142	99.4	72.7	77	8.37	99.5	59	17.6	3.75	5.41	6.25
CD201	0.275	0.112	3.26	2.02	3.74	15	9.82	2.64	10.1	0.198	0	0	0	22.8	3.38	69.5	78.5	0.00923	0.526	0	0.255	0	1.94	0.442	0.0275	0.101	0.00778	1.85	41.9	30.5	0.152	32.2	0.153	2.59	0.0507	0.0789	0.0128	0.0281	0.0568	81.1	0.181	0.645	4.67	61.7	6.74	8.3	1.9	0.229	1.82
CD202b	52.8	50.9	51.3	0.902	0.592	2.91	12	3.57	7.76	0.0432	0	0.0927	0.0403	1.05	0.0543	6.6	0.17	2.01	0.00993	0.386	1.55	0.0928	2.03	1.98	0.257	0.0968	0.594	3.16	0.281	0.267	0.117	0.162	0.0365	0.247	0.0468	0.154	0.0349	0.686	0.12	56.3	2.83	49.7	64.1	29.5	36.6	48.5	31.9	44.6	69.1
CD203c	11.8	7.21	19.5	0.568	0.787	0.65	1.02	0.397	1.62	9.37	0	0.0616	0.0741	77	78.4	91	84.4	0.106	52.1	1.64	0.153	0.0225	3.89	0.0605	0.068	0.0589	0.0614	0.0797	2.03	3.92	0.0192	2.12	0	1.26	0.0467	0	0.176	4.65	0.14	88.6	98.2	98.2	97.9	99.8	88	41.4	6.54	41	32.9
CD204	13.8	15.3	17.1	0.356	0.297	4.39	3.08	0.21	0.319	0.0711	0	0.0776	0	0.353	0.0138	0.872	0.411	3.49	0	0.182	1.21	0	1.75	1.28	0.0724	0.0987	0.162	3.39	0.0671	0.169	0.231	0.113	0.22	0.0445	1.06	0.674	0.00562	0.239	0	4.62	1.43	19.9	27.9	4.33	5.31	21.7	11.3	32.1	41.6
CD205	93.8	86.6	96.8	4.12	5.67	6.84	0.163	0.823	0.812	0.0379	0.163	9.54	4.69	6.27	0.00757	14.3	2.31	0.0232	44.5	0.458	2.64	0	0.474	0.156	0.0106	0	0.274	0.0476	21.1	1.72	0.108	10.4	11.4	39.4	0.0772	0.287	0.688	0	0	42.7	78	4.63	44.1	72.8	28.9	60.5	64.8	91.9	67.7
CD206	2.26	0.118	2.17	0.057	0.0463	0.139	0.0382	0.0482	0.181	0.0166	0	0	0.0394	0.109	0.0127	0.32	0.0908	0.00453	0.0144	0	0.237	0	0.269	0	0.0206	0	0.00795	0.00422	0.0441	0.108	0	0.0363	0.0502	0.121	0.0746	0.0414	0.00544	0.0939	0.0623	2.03	0	7.5	4.06	6.08	0.963	14.8	6.26	12.7	24.8
CD207	0.0779	7.35	9.38	0.637	0.0618	0.731	0.187	0.217	0.469	2.1	0	0.113	0.079	8.83	0.389	0.675	5	0.151	0.0673	0.16	0.432	0.0346	0	0.29	0.0138	0.14	0.0898	0	7.22	0.264	0.393	4.64	0.683	7.64	0.0381	0.193	0.0249	1.86	0	0.245	1.18	0	1.27	0.653	0.207	1.75	3.24	1.36	9.81
CD208	11.1	12.6	26.4	0.107	0.0909	0.255	0.801	0.128	0.0717	0.0175	0	0	0.0736	0.344	0	0.382	0.412	0	0.125	0	0.0823	0	0.0675	0.076	0.0223	0	0.00791	0	0.154	0.0403	0.107	0.176	0.0266	0.0375	0.0262	0	0	1.34	0	6.69	0.457	18.2	13.5	23.7	4.78	5.77	0.912	5.85	8.77
CD209	0.0323	0.308	0.4	0.044	0.0617	0.209	0.0445	0.226	0.0447	0.0651	0	0	0.049	0	0	0.246	0	0.00469	0.0398	0	0.127	0	0.403	0.154	0.0548	0	0	0.00985	0.104	0.18	0.03	0.166	0.018	0.134	0	0	0.0174	0.0326	0	0.341	1.44	6.67	0.613	0.543	3.77	7.51	4.35	6.29	15.2
CD21	43.3	33.5	23.1	0.106	0.0875	0.2	0.198	1.67	3.01	0.101	4.99	1.87	2.15	32.4	7.74	1.1	2.67	0.0753	2.23	1.03	1.06	79.6	1.43	2.05	1.46	2.28	0.894	5.44	68.5	62.2	1.62	57.1	1.77	72	0.988	1.13	81.2	0.101	0	32.1	23.5	7.37	52.2	35.2	0.931	34.7	4.36	3.81	26.4
CD212	8.47	13.1	22.8	0.0572	0.0699	0.106	0.041	0.103	0.0613	0.0251	0	0.0682	0	0.0174	0	0.425	0.111	0	0.134	0	0.141	0	0.474	0.236	0.0101	0	0.00815	0.00671	0.213	0.241	0	0.0959	0.0138	0.0602	0.0259	0.0436	0	0.0523	0.0312	17.4	0.15	3.42	20.1	1.36	0.705	10.1	2.12	2.95	15.7
CD213a2	21	5.05	9.26	2.77	4.24	2.8	0.043	0.0658	0.0698	6.64	1.57	25	14.2	83.7	41.8	98.8	48	10.5	88	22.6	33.6	0	55.5	1.75	4.54	0.0656	1.62	0.141	6.51	1.41	0.0635	10.5	8.35	5.11	0.0712	5.48	0.00962	3.69	0	3.03	44.8	9.18	86.1	19.9	2.87	2.19	8.63	2.99	53.9
CD215	26.6	22.8	34.4	0.299	0.319	1.91	1.02	0.3	0.499	0.0392	0	0.0386	0.097	3.59	0.00904	0.591	0.64	1.05	0.419	0.0805	0.148	0.0476	0	0.347	0.197	0.0301	0.213	0.239	0.232	0.422	0.302	0.403	0.865	0.346	0.76	1.56	0.019	0.274	0.0276	38.1	1.2	18	24.7	2.68	7.87	35.3	7.17	35.9	30.9
CD217	36.5	50	55.3	0.493	0.41	0.982	3.29	0.683	0.936	0.0402	0	0.424	0.275	31.7	1	5.86	6.26	2.49	0.442	0	0.103	0.0231	0.241	0.117	0	0	0.12	0.0188	0.143	0.238	1.26	0.654	1.22	0.343	2.09	2.17	6.78	4.15	0.0821	0.22	1.37	0.345	0.526	0.933	0.544	3.82	1.41	6.94	10.3
CD218b	36.2	18.1	17.4	2.2	0.88	1.54	2.66	3.06	4.12	13.2	1.96	1.74	2.65	8.8	0.132	0.911	0.423	12.8	3.49	0.0466	0.13	2.04	0.16	0.517	0.736	0.177	0.767	0.373	1.95	1.73	3.9	1.02	3.99	5.15	7.03	6	0.326	9.47	0.136	23.7	2.64	25.2	21.7	33.6	11.8	18.2	4.78	36.3	19.5
CD22	28.1	22.4	18.4	16.4	22.8	15.5	1.3	0.147	0.188	0.0968	0	0.189	0.0702	2.45	0.0355	0.933	0	0.0841	0.169	0.11	0.241	0.0097	0	0.207	0.0942	0.0241	0.185	0.186	0.62	0.599	0.0359	0.179	0.0322	1.97	0	0.0699	0.0524	0.251	0	2.15	0.436	1.18	23.9	3.16	0.931	30.5	7.81	14.2	18.8
CD220	5.97	6.89	12.4	0.196	0.297	0.456	3.1	19.5	0.492	0.0333	0	0.177	0.124	14.4	0.246	19.4	29.1	0.234	0.13	0.274	0.112	0.0202	0	0.408	0.0115	0.0571	0.722	0	6.88	2.56	0.131	0.915	0.339	4.46	0.445	0.776	0.197	0.522	0.176	3.65	30.5	13.3	4.96	5.67	7.63	3.2	0.868	5.69	4.03
CD221	8.42	8.11	17.1	95.4	94.7	95.4	77.5	34.4	1.25	3.38	4.78	13.5	3.88	94	50.9	95.8	99.9	11.6	98.7	8.45	1.02	69.4	1.89	9.34	1.42	80.4	93.8	21.7	99.8	99.8	45.3	99.9	57.2	99.8	17.3	86.2	32.7	79.3	0.929	98.4	92.9	98.8	96.3	94.7	84.9	18.5	2.96	20.2	15.5
CD222	4.27	8.47	17.1	30.5	26.3	20.6	0.624	0.498	3.49	0.0864	0	0.476	0.0296	0.597	0.027	37.4	0.358	0.0158	16.4	0	0.111	0.145	0.371	0.277	1.46	10.4	0.114	0.616	32	17.3	1.91	18.1	6	13.8	0.649	7.68	0.0274	0.149	0	7.42	4.38	9.48	11.8	3.18	3.39	9.23	3.11	6.64	12.4
CD223	36.2	23.1	29.7	8.48	6.11	91.7	99.5	100	99.9	0.651	4.23	47.3	39.3	54.4	10.3	7.24	99.8	9.77	13.8	0	0.0796	4.58	2.19	0.44	0.858	0.129	0.977	6.28	37.5	12.2	13	17.2	10.6	9.3	17.2	12.1	3.61	31.1	0.413	83.2	6.64	87.1	82	77.4	51.7	42.3	24.5	54.1	59.2
CD226	28.5	40.6	54.3	0.0421	0.0584	0.204	0.0691	0.123	0.105	0.0519	0	0	0.0496	0.0946	0.0134	0.336	0.195	0.0091	0.308	0	0.142	0	0.131	0.106	0.0103	0	0.023	0.00599	0.268	0.0993	0.0208	0.0907	0.0129	0	0	0	0.0177	0.29	0	2.6	0.667	0.513	7.04	1.34	0.917	30.9	14.8	23.7	32
CD227	21.5	24	21.9	27	36.1	30.9	0.0689	0.726	1.6	0.178	0.694	20.9	77.1	35.2	74.5	99.4	93.7	0.00933	97.8	1.36	1.56	0.0205	2.1	5.75	11.1	4.37	27.9	4.44	25.9	22.4	16.6	31.4	14.4	6.44	2.44	27.8	0.705	3.78	17.9	70.1	57.3	57.1	84	95.4	57.9	49.7	17.9	7.89	31.7
CD229	58.8	68.2	75.8	0.217	0.115	0.527	0.0746	0.125	0.129	0.0699	0	0.0406	0.0979	3.89	0.0686	2.06	14	0.0281	15.5	0	0.226	0.0298	0.147	0.0278	0.0311	0	0.0242	0.0567	0.138	0.0839	0.0762	0.0946	0.496	0.2	0.091	0.141	0.0235	0.275	0.0525	1.45	29.2	4.03	21.6	5.19	6.36	58.1	27.5	57.4	49.2
CD23	2.8	3.48	7.39	0.0436	0.0297	0.126	0.0796	0.0798	0.0605	0.0447	0	0	0	0.071	0.0114	0.237	0.0638	0.0293	0.0545	0	0.218	0.00947	0.101	0.245	0.0548	0	0.0441	0	0.0389	0.028	0.0143	0.0115	0.00878	0	0.0522	0.0567	0.00557	0.228	0	1.26	0	1.79	4.93	0.516	0.201	2.51	3.62	0	5.42
CD230	67	69.9	78	99.8	99.9	99.7	6.78	91.4	73.7	9.78	51.6	62.9	32.7	81.2	16.3	99.9	99.8	43.7	20.1	2.74	74.7	99.2	83.5	19.5	92.5	98.2	100	99.2	100	99.3	98	100	99.6	99.8	82.8	96.1	99.4	93.6	36.1	96	91.6	70.5	93.5	98.6	83.4	89.4	49.8	74.7	91.6
CD231	54.4	49.5	57.3	0.213	0.18	0.854	2.53	7.33	14.9	0.0707	0	0.256	0.225	1.25	0.0343	0.848	0.21	0.642	0.72	0.0739	0.308	0	0.488	0.352	0.0598	0	0.108	0.466	0.254	0.153	0.463	0.111	0.258	0.0456	0.575	0.491	0.056	0	0.0303	53.2	2.4	36.9	53.7	31.2	27.2	37.8	3.12	29.8	45
CD234	22.3	20.2	22.4	0.526	0.442	2	3.34	0.597	0.78	0.111	0.897	0.085	0.205	7.64	0.0271	0.851	0.649	7.88	0.231	0.351	0.414	0.0453	0.451	0.468	0.342	0.45	0.537	0.655	0.32	0.176	1.04	0.297	1.01	0.473	2.58	2.49	0.0779	1.89	0.0262	30.3	3.22	11.5	11.9	2.3	3.54	29.5	9.43	40.6	39.2
CD235a	35.3	34.2	35.4	0.706	1.18	1.36	35.2	5.99	4.82	4.31	0	0.39	0.602	6.68	4.18	1.56	1.07	0.0693	3.5	0.0465	0.13	0.0405	0.374	0.313	0.392	0.118	0.341	0.231	2.66	1.27	2.42	0.989	1.34	3.29	2.46	1.79	5.38	42.4	0.0317	44.3	39.7	12.9	22.4	31.2	20.2	28.4	9.97	12.5	15.3
CD24	26.2	22.3	13.5	3.46	3.54	5.59	0.525	1.36	2.24	99.5	77.9	95.2	98.2	99.2	99.6	99.9	99.5	96	96.2	74.6	0.198	0.0596	0.064	0.166	0	0	0.0425	0.00819	0.38	0.322	0.0606	0.284	0.0591	0.236	0.529	0.12	0.0106	0.0479	0	93.9	96.6	98.7	97.2	99.8	90	52.1	9.11	16.4	23.5
CD243 (BC)	28.7	26.9	23.4	0.0714	0.0547	1.45	0.387	0.307	0.473	0.0641	2.46	0.139	0.0856	7.74	0.0125	99.4	4.75	0.165	0.229	0.871	0.702	0.0271	0.651	0.655	0.0445	0	0.0854	0.0574	4.37	4.02	0.14	4.18	0.0607	3.96	0.0462	0.113	0.0109	17.9	0	55.7	4.28	33.9	51.1	38.8	16.5	17.7	2.39	36.6	47.6
CD243 (BD)	0.406	0.266	1.04	0.0548	0.0569	0.111	0.151	0.115	0.191	0.0282	0	0	0	0.0735	0.036	3.99	0.13	0.00483	0.0497	0	0.0482	0	0.132	0.076	0	0.0244	0.0151	0.00739	0.0992	0.0619	0	0.0125	0.0122	0	0.0482	0	0	0	0.0343	1.84	4.4	12.9	20.1	0.817	0.369	1.9	1.46	11.2	12.8
CD244	4.2	1.6	9.4	0.0818	0.121	0.175	0.127	0.0829	0.0759	0.0479	0	0	0.051	0.0505	0.029	0.387	0	0.00955	0.144	0	0.121	0	0.145	0.127	0.0108	0	0.0222	0.00789	0.0943	0.0645	0.0234	0.0126	0	0.0927	0	0	0.0105	0.184	0.0862	0.738	0.463	2.6	15.5	1.12	1.03	3.01	1.94	4.94	14
CD245	38.2	33.4	45.4	18.5	53.9	45.1	9.05	0.205	0.216	7.12	0.356	2.04	0.253	8.4	11.8	48.8	7.34	0.0265	30.8	0.216	11.1	7.04	30.6	40	0.101	0.143	86.6	97.3	24.3	21.2	0.342	10.9	31.8	62.8	0.359	63	39.9	77.6	0.0573	68.8	88.6	86.9	95.6	70.9	38.7	15	2.46	38.2	51.3
CD247				0.859	0.31	1.7	0.556	0.48	0.296	0.212	0	0.0844	0.108	2.22	0.693	3.2	0.309	2.49	0.294	0.338	0.0895	0.0634	0.206	0.16	0.0335	0.0298	0.189	0.109	0.654	0.543	1.07	0.29	0.99	0.616	1.61	1.35	0.0343	5.19	0.0941	2.19	1.1	10.4	26.4	6.82	9.1	3.06	3.69	14.4	33.1
CD249	53.2	38.1	60.5	0.532	0.301	0.875	12	1.22	1.44	0.501	0	0.193	0.32	0.76	0.314	2.3	0	0.0525	3.03	0.045	0.0629	0.0144	0.411	0.144	0.281	0.119	0.271	0.0681	0.442	0.815	1.72	0.375	0.615	0.316	1.49	1.27	0.254	3.43	0.429	9.22	3.61	30.1	38.8	35.4	18.3	8.63	32.5	48.1	78.5
CD25	39.7	43.6	53.8	0.0714	0.0775	0.304	0.45	0.179	0.0537	0.0915	0.115	0.0849	0.0171	0.524	0.0173	0.259	0.0923	3.66	0.421	0	0.14	0	0.0637	0.156	0	0	0.016	0.0196	0.335	0.287	0.0201	0.144	0.0691	0.179	0.0677	0.0765	0.0371	0.0757	0.0312	30.4	0.642	8.67	62.4	11.4	1.49	23.4	5.83	13.2	46.4
CD252	30.2	7.26	8.63	1.22	1.46	3.08	7.6	3.03	3.57	2.45	3.47	7.12	3.47	14.6	1.94	2.28	2.23	1.72	11.4	0.855	1.29	90.4	1.1	1.24	5.93	0.707	5.9	1.7	0.852	1.39	2.08	0.602	8.69	2.22	8.35	2.22	6.35	97.8	3.99	3.32	3.15	16	7.39	2.99	2.32	4.66	7.56	10.4	10.1
CD253	44.4	11.2	2.36	1.97	2.86	2.92	5.86	1.72	2.9	1.47	0.212	3.24	3.15	3.03	1.5	1.61	0.721	3.04	9.49	0.829	1.6	0.619	1.79	2.17	1.06	1.34	1.79	1.82	1.24	1.23	3.96	1.05	3.22	0.985	4.24	4.3	0.78	8	0.529	23	3.69	23.9	16.5	2.1	1.45	14.1	3.79	21.6	7.46
CD254	22.5	31.5	33.6	14.4	0.532	0.636	20	1.01	1.71	0.132	2.16	1.08	0.28	3.94	0.0273	1.8	0.193	0.541	1.72	0	0.148	0.0268	0.139	0.156	0.314	0.133	0.529	0.221	1.86	1.84	3	1.46	1.97	1.63	6.12	2.56	0.265	10.3	0.0316	11.5	6.05	18.5	68.9	19.5	18.5	8.04	4.8	21.1	39.7
CD255	40.7	21.9	28.4	0.155	0.293	0.733	1.42	1.61	2.75	0.258	0	0.129	0.173	2.1	0.228	0.633	1.22	0.138	1.23	0.0341	0.236	0	0.316	0.253	0.0856	0.514	0.177	0.0927	2.35	2.26	0.42	2.22	0.395	2.58	0.293	0.4	0.247	2.08	0.219	46.2	1.8	18.1	38	13.2	0.547	31.9	1.86	16.4	18.2
CD256	16.7	18.1	24	0.148	0.125	0.19	0.114	0.17	0.351	0.0451	0.211	0.145	0.177	0.43	0.0435	2.17	0.215	0.162	0.304	0	0.0502	0.00851	0.0829	0.123	0.0308	0	0.017	0.0142	96.9	59.6	0.52	96.4	0.38	99.4	0.942	0.423	0.0185	9.05	0.0244	4.59	1.04	18	41.1	12	15	6.04	2.52	18.1	29.5
CD257	30.9	33.2	36.4	1.53	1.16	3.37	23.4	31.8	48.6	0.207	1.48	2.19	1.14	9.56	0.123	1.95	0.236	14.2	1.41	0.112	0.985	0.639	0.44	5.07	0.34	0.185	0.329	0.235	2.48	2.49	4.71	3.92	5.17	2.67	9.05	7.4	0.0958	13.7	0	28.6	2.44	41.9	67.4	59	36.4	14.3	2.99	33.8	38.5
CD258	34.6	17.3	20.5	0.0888	0.0793	0.259	0.132	0.062	0.0691	0.041	0	0	0.0437	0.0508	0.0243	0.576	0.335	0.0501	0.0934	0	0.0698	0	0	0.0826	0	0	0.043	0.0155	0.171	0.095	0.0191	0.0757	0	0.112	0	0	0.0349	0.0687	0	27.2	3.4	4.85	14	50.2	5.57	51	34.3	9.65	66.1
CD26	31.4	32.3	45.2	9.61	8.8	10.2	12	6.14	16.7	99.6	78.4	97.8	85.4	99.1	76.6	99.8	99.9	95.7	96.6	99.1	97	75.4	96.8	3.96	32.9	37.1	77.6	20.1	36.2	64.3	77.4	97.4	56.1	38.5	25.8	77.5	99.4	42.1	81.9	95.3	65.3	98.5	96	99.9	88.1	43.1	12	57	37.6
CD261	14.1	17.1	28.8	49.6	41.1	91.7	98.5	47.7	36.3	0.0611	0.401	0.0312	0.139	2.99	0.0464	21.8	1.21	0.0801	18	0.289	0.0829	0.0297	0.346	0.16	0.0108	0.0281	0.155	2.92	2.32	1.47	0.383	2.7	0.29	11.9	0.143	0.605	0.0155	9.89	0.0519	13.1	1.14	26.1	41.9	31.1	17.3	9.37	2.25	19.6	37.2
CD262	37.4	4.67	11.9	18.2	18.5	50	97.9	44	75.5	33.5	1.64	0.806	4.89	10.6	0.571	52.5	3.03	0.0445	27	0.214	3.76	27.5	4.8	1	1.03	13.6	2.68	37.7	74	52.3	8.18	64.6	17.5	77	1.31	53	31.9	20.3	0.0693	48	10.2	22.4	70.4	69.9	4.05	24.8	1.99	12.9	41.5
CD263	20.7	15.5	31.7	3.88	7.02	9.17	0.342	0.0669	0.0158	0.0266	0.485	6.3	44.8	3.97	0.0389	0.821	0	0.0047	0.0226	0.0731	0.168	8.55	0.552	0.182	0.434	2.24	0.168	4.59	9.72	5.72	0.949	4.56	1.55	3.03	0.912	33.9	1.05	0.684	0.236	8.22	1.2	10.3	19.6	77.2	21.4	36.5	24.9	8.2	54.1
CD264	15.1	15.6	26.4	24.3	20.5	32.4	22.9	15.7	50.9	6.36	2.2	2.29	38.6	5.72	0.0986	25.7	11.1	0.0227	9.03	0.821	0.064	32	1.15	1.98	7.01	5.9	3.3	92	55.2	45.4	22.9	71.6	52.8	95.7	12.5	53.9	2.41	59.8	0	4.94	4.52	14.3	27.7	43.2	10.7	37	38.1	21.7	67.9
CD267	53	48	54.1	0.892	0.941	1.97	4.87	9.54	15.8	1.48	0	0.258	0.447	24.5	1.06	10.8	6.73	0.403	2.4	0.2	0.373	0.106	0.426	0.365	0.463	0.34	1.03	0.347	0.227	0.231	0.861	0.143	0.554	0.254	0.952	0.629	1.28	3.01	0.262	51.3	5.85	54.5	25.9	36.4	7.44	36.6	5.46	45.9	14.5
CD268	31.4	30.5	30	1.57	1.25	3.66	5.42	4.08	5.01	7.22	0.242	0.419	0.301	10.9	6.79	12.1	7.14	2.05	2.48	0.171	1.46	0.348	1.16	2.23	0.927	0.633	4.64	1.94	3.34	1.52	0.827	3.51	0.612	0.557	0.839	0.832	6.42	6.67	5.02	10.7	9.78	49.3	56.1	6.37	6.8	15	7.79	42.9	35.2
CD269	15	15.8	17.7	0.116	0.0956	0.256	0.27	0.218	0.248	0.103	0	0.0883	0.0793	0.122	0.0352	0.678	18.3	0.0555	0.246	0	0.0943	0.0272	0	0.0863	0.0524	0.0259	0.033	0.0549	0.0681	0.124	0.0418	0.0579	0	0.0556	0.0241	0.0385	0.111	0.088	0.0264	6.43	0.569	8.79	12.5	5.79	11.3	12.6	28.5	13.1	40
CD27	58.5	56.7	52.8	0.0516	0.0711	0.156	0.0786	0.0555	0.0614	0.0344	0.103	0.0536	0.0338	0.256	0.00639	0.299	0.146	0.299	0.0902	0	0.152	0	0.128	0.159	0	0	0.0238	0.00398	0.128	0.218	0.0193	0.183	0	0.0621	0.0441	0	0.0099	0.108	0.0304	15.5	0.252	1.59	5.14	9.16	0.62	35	15.9	32.7	19.6
CD270	67.9	67.1	68.7							0.141				55.8	4.31	1.39	93																				2.12			92.8	22.4	57	74.6	93.1	36.1	58	16.6	48.1	53.2
CD271	6.03	9.68	18.9	29.7	34.5	39.5	0.102	1.74	13	0.105	0	0.303	0.0623	0.431	0.416	0.678	1.2	4.21	0.151	0	0.106	0	0.273	0.134	0.114	19.4	0	0.338	14	10.5	0.258	15	0.0753	2.57	0.0598	4.57	0.676	0.643	0.289	3.89	1.85	3.29	17.5	1.54	4.96	3.56	2.68	2.48	12.1
CD272	49.8	56.1	10.1	1.82	1.39	3.03	8.38	2.75	4.68	1.84	0	0.604	0.551	6.91	1.17	5.72	2.92	1.08	2.36	0.628	0.299	0.147	0.558	0.502	0.197	0.107	0.909	1.35	0.296	0.278	2.31	0.134	1.72	0.619	3.08	2.15	0.82	4.08	0.232	1.45	4.15	51.9	44	2.03	1.87	2.53	4.76	49.4	24.4
CD273	16.8	8.79	14.8	1.37	0.757	3.82	0.0758	0.0672	0.0539	0.0731	0.353	0.232	0.0583	0.685	0.0143	0.541	0.224	0.0143	6.73	0.0378	0.172	69.2	0.0736	0.66	3.09	1.79	39	97.4	95.2	84	39.5	95	46.4	97.7	19.5	43.6	1.23	71	0.591	0.205	0.303	5.53	6.86	1.82	1.39	1.84	1.67	5.42	7.84
CD274	10	10.5	15.3	77.3	54.6	90.7	0.231	0.368	0.731	0.163	0.427	0.128	0.622	11.9	0.205	7.14	1.34	0.11	28	0.236	0.208	25.9	0.195	0.159	0.127	0.116	1.6	39.8	57.5	35.9	2.65	62.9	1.09	79.1	0.359	2.22	0.116	15.4	0.855	36.3	1.29	2.64	16.8	20.6	1.56	9.38	1.77	1.63	8.6
CD275	26.8	26.3	24.5	0.102	0.211	0.474	0.25	1.61	2.66	0.162	0.285	0.0946	0.0525	0.637	0.0908	8.56	0.586	1.02	0.455	0.075	0.13	0	0.685	0.155	0.0236	0	0.0311	0.0277	0.163	0.16	0.1	0.125	0.0708	0.189	0.237	0.162	0.0347	0.792	0	40.6	1.95	19.4	47.6	3.04	3.09	16.8	1.98	19.5	35.3
CD276	0.936	22.5	16.8	99.9	99.9	98.3	99.9	98.4	98.9	98.7	48.9	90.3	97.9	87.5	98.2	100	99.7	5.25	99.1	46.7	98	99.3	99	99.4	99.4	99.7	99.9	99.7	99.9	84.1	94.1	99.8	100	99.9	88.7	98.4	99.7	95	78.7	46.5	98.1	93.5	95.3	83.4	90.2	24.4	25.7	46.7	47.9
CD277	17	4.9	5.79	0.065	0.074	0.168	0.0579	0.447	2.17	0.026	0	0	0	0.0986	0.0251	0.48	0.145	0.0768	0.0779	0	0.0773	0.00854	0.086	0.0654	0.0308	0	0.0167	0.0203	0.208	0.228	0.0197	0.149	0	0.278	0.0476	0	0.0116	0.0496	0.0272	73.9	6.8	8.23	19.2	85.2	4.8	20.9	2.45	7.69	12.6
CD278	0.704	0.65	2.5	0.0308	0.0457	0.104	0.0673	0.0853	0.0848	0.0172	0	0	0.0365	0.114	0	0.321	0.0677	0.00459	0.0346	0	0.199	0	0.194	0.0518	0	0	0.0156	0.00377	0.128	0.0815	0	0.0397	0	0.0319	0	0	0.0253	0.118	0	0.243	0.118	0.781	1.14	0.51	0.315	2.01	1.08	0.637	1.99
CD279	25	21.4	34.5	0.0501	0.0526	0.166	0.0991	0.245	0.322	0.0361	0	0	0.0179	0.257	0.0337	0.367	0.252	0	0.195	0	0.0772	0	0.0635	0.104	0	0	0.00747	0.0132	0.0565	0.0639	0.104	0.0375	0.0385	0.0872	0	0.042	0.0419	0	0.103	7.52	0.247	6.64	12.3	4.38	1.84	7.43	2.98	9.35	12
CD28	56.6	64.9	55.4	0.0705	0.0444	0.193	0.111	0.063	0.069	0.0327	0	0.0273	0.0175	0.159	0.00626	0.267	0.102	0	0.176	0	0.144	0	0.135	0.111	0.0117	0	0.0237	0.00832	0.0406	0	0.019	0.0469	0	0.0875	0.0225	0	0.00492	0.0632	0	28.2	0.567	1.4	14.1	26	0.423	44.5	35.4	37	32.9
CD281	38.8	39.6	42.7	0.176	0.167	0.243	3.35	0.769	0.753	0.0233	0.153	0.0734	0.0435	0.458	0.0113	0.873	0.15	0.00928	1.28	0	0.0683	0	0.218	0.111	0.0102	0	0.0313	0.0295	0.702	2.33	0.123	1.81	0	0.234	0	0.0826	0	0.331	0	23.7	3.38	40.7	47.7	38.7	23.7	45.4	30.5	42.2	69.1
CD282	24.6	32.2	17.2	0.0341	0.0242	0.204	0.0378	0.0575	0.0742	0.0277	0	0.244	0.127	0.0851	0	0.194	1.4	0	0.0233	0	0.0645	0	0.238	0.139	0.0558	0.326	0.0336	0.00432	0.0105	0.0146	0	0.024	0.0276	0	0.0272	0	0	0	0	11.5	0.602	2.09	1.65	1.83	0.213	36.3	20	19.1	36.4
CD283	39.4	31.4	17.9	1.86	0.8	4.69	33.1	1.08	1.66	0.0516	0	0.219	0.258	3.94	0.0171	8.26	0.279	1.1	7.12	0.053	0.0836	0.0866	0.262	0.127	0.531	0.134	0.176	0.0721	4.61	8.01	1.1	5.23	0.685	4.6	0.814	0.824	0.032	0.609	0	41.8	6.88	53.7	43.9	51.5	10.5	27.5	13	43.2	37.1
CD284	32.2	12.1	22.8	0.289	0.194	0.979	1.96	1.88	3	0.0892	0	0	0	0.252	0.0426	2.21	0.348	0.0452	0.475	0.0892	0.0393	0.0708	0.0839	0.0893	0.0457	0	0.153	0.174	0.622	0.476	0	0.532	0.0246	0.468	0	0.311	0.0624	0	0.613	25.4	5.71	33.3	46.8	17.9	13	39.5	25.4	40	62.3
CD286	48.3	42.9	50	0.109	0.115	0.288	4.1	0.125	0.0849	0.0328	0.337	0.0647	0.274	0.204	0	1.86	0	0.00461	0.0966	0	0.0748	0	0.425	0.0361	0.0146	0	0.0255	0.0638	0.455	0.301	0.0667	0.153	0.0679	0.381	0.104	0.377	0.0112	0.244	0	37.2	6.89	35.3	48.5	48.1	45.1	51.6	38.1	42.9	79.4
CD288	47.1	43.6	49.4	0.336	0.745	2.77	29.1	1.1	3.46	0.187	0.571	0.367	0.379	1.95	0.125	6.04	16.7	0.55	1.09	0.353	0.325	0.0821	0.658	0.768	0.594	0.424	0.0413	1.1	2.65	4.37	1.31	3	1.5	2.97	1.01	1.89	0.105	11.1	0	48.9	8.87	50.8	55	57.6	51.3	44.9	18.6	41.9	56.1
CD289	16.7	14.1	21.1	0.114	0.149	0.335	0.798	1.13	1.58	0.0272	•	0.161	0	0.572	0.0204	0.313	0.301	0.00917	0.427	0	0.142	0	0	0.235	0.026	0	0.032	0.0246	0.142	0.132	0.58	0.0743	0.247	0.248	0.393	0.199	0.0203	0.147	0	3.89	0.172	11.9	50.7	3.52	0.527	3.58	1.68	5.8	31.8
CD29	86	84.3	84.7	99.9	100	99.9	100	99.9	99.8	94.3	58.5	88.8	96.3	99.2	100	99.9	100	99.2	100	98.9	99	100	97	99.6	99.7	99.4	100	100	99.8	99.8	99.6	99.7	99.6	99.9	99.6	99.4	100	97.4	97.9	97.7	97.8	99.1	98.4	99.9	93.4	86.2	66.6	94.3	94.1
CD290	50.6	53.1	50.9	0.57	0.338	0.432	6.65	5.09	7.25	0.656	0.285	0.585	0.291	5.33	0.48	1.62	0.398	0.493	1.5	0	0.0288	0.0163	0.07	0.0264	0.16	0	0.0718	0.111	1.12	0.945	3.1	0.599	2.44	0.366	5.45	5.23	0.314	2.39	0.361	39.4	7.85	43.8	63.4	7.59	17.9	48.2	19.8	46.1	56.5
CD292	7.35	17.7	13.4	0.0796	0.0877	0.486	0.144	0.116	0.226	0.0393	0	0.455	0.122	4.34	0.00914	0.361	0.366	0.0055	0.549	0.031	0.0632	0.00818	0.371	0.149	0.0691	0	0.0109	0.00933	0.0103	0.0896	1.14	0.0723	1.05	0	2.15	2.39	0.00686	0.144	0.0413	20.8	1.28	6.7	6.04	8.13	4.71	23.8	1.95	4.27	5.05
CD294	24.9	36.8	43.5	0.099	0.123	0.351	0.206	0.0747	0.0905	0.0194	0.41	0.448	0.449	2.05	0.0776	0.285	0.542	0.24	0.365	0.222	0.0457	0.0283	0	0.176	0.0113	0.0285	0.057	0.0378	0.255	0.313	0.311	0.155	0.357	0.21	0.231	0.604	0.119	0.956	0.146	2.43	1.5	1.83	0	3.47	1.03	10.5	0.182	2.33	1.67
CD295	38.9	42.1	47.6	8.18	2.68	21.3	4.75	9.78	14.5	0.139	0	0.072	0.185	1.98	0.0601	49.4	10.9	0.0136	11.1	0.177	0.0844	1.23	0.0765	0.0599	0.324	0.293	17.6	4.42	99.8	73.1	0.66	99.8	2.63	99.9	0.923	1.35	0.566	7.42	0.313	97.1	1.98	46.3	57.1	93.6	54.3	29.9	5.73	29.5	42.1
CD298	96.7	96.5	96.6	100	99.9	99.7	99.6	34.6	14.6	47.7	22.4	78	91.7	58.3	18.1	99.8	30.3	32.4	99.9	31.7	69.3	99.9	90	95.4	99.3	99.7	99.4	100	99.9	99.9	0	100	0	99.9	0	0	98.5	86.4	97.2	53.7	23.5	18.4	37.1	52.8	0.108	81.7	91.6	95.8	97.6
CD299	45.3	30.7	16.8	0.218	0.102	0.32	1.8	0.818	1.4	0.116	0	0	0.044	0.232	0.0488	1.18	0.449	0.0367	0.159	0.04	0.1	0	0.301	0.177	0	0	0.046	0.0201	0.16	0.138	0.0415	0.0241	0.051	0.0286	0.025	0	0.0103	0.0929	0.084	19.7	1.23	28.1	17.4	19.5	7.53	18.7	8.8	41.9	33.8
CD3	54.2	54.8	60.7	0.0382	0.0592	0.0963	0.0691	0.044	0.0703	0.0218	0	0.0295	0.0355	0.0656	0.0055	0.207	0.0997	0.0194	0.0158	0	0.273	0	0.125	0.211	0	0	0.0245	0	0.0493	0.0553	0	0	0	0.112	0	0	0.0105	0.0738	0	9.71	1.09	0.372	0.816	4.58	0.236	37.1	52.7	49.2	33.4
CD30	3.17	2.92	5.26	0.161	0.0649	0.194	2.78	0.177	0.214	0.0164	0	0	0	0.107	0.0318	0.337	0	0.00942	0.0832	0	0.161	0	0.281	0.14	0	0.0648	0.0164	0	0.115	0.0821	0.0185	0.0555	0	0.113	0.0226	0.0373	0	0.0774	0	1.39	0.383	5.19	9.07	3.28	0.426	2.45	2.05	4.45	9.98
CD300a	62	62.2	64.9	0.0575	0.0588	0.127	0.202	0.0431	0.105	0.025	0	0.0391	0.0251	0.0886	0	0.281	0.183	0.00481	0.031	0	0.158	0	0.153	0.0286	0	0	0.0269	0.00981	0.173	0.118	0	0.0233	0.0118	0.029	0	0	0.00574	0.0804	0.0371	1.52	0.886	4.95	74.9	92.1	51.8	69.2	45.9	67.9	79.9
CD300d	52.3	56	45	0.177	0.132	0.354	2.67	0.316	0.585	0.0255	1.18	0.337	0.285	7.63	0.0385	0.722	0.195	2.04	2.7	0	0.919	4.04	0.159	5.47	1.88	0.028	0.621	0.384	1.43	1.3	3.39	1.67	4.53	6.91	5.2	13.6	0.0281	5.78	0.16	47	5.27	23.1	46	29.8	15.3	40.7	11.7	29.7	40.4
CD300e	39.7	40.5	42.6	0.0711	0.05	0.169	0.151	0.191	0.325	0.0537	0	0.0329	0	0.162	0.0133	0.332	0.21	0.00903	0.595	0	0.0943	0	0.156	0.0561	0.0273	0	0.0449	0.00776	0.107	0.155	0	0.0531	0	0.127	0	0.0863	0	0.0763	0.0524	4.9	0.753	23.2	31.5	1.94	3.56	5.01	6.26	30.5	32.5
CD301	3.38	9.08	16.7	0.272	0.238	1.64	0.143	0.128	0.0651	0.0882	0	0.264	0.123	0.126	0.0384	0.557	0	0	3.2	0	0.227	0	0	0.268	0.136	0.204	0.038	0.794	0.0164	0.0468	1.08	0.0548	0.921	0.0431	1.5	0.714	0.035	0.205	0	19.4	1.44	4.08	9.2	3.65	4.19	22.1	3.52	3.03	7.17
CD303	36.4	37.5	34.4	0.107	0.068	0.183	2.66	0.204	0.256	0.0958	0.676	0.386	0.358	0.454	0.059	0.68	1.23	0	0.108	0	0.145	0	0.206	0.13	0.0226	0	0	0.0823	1	0.529	0.361	0.454	0.369	0.513	0.501	0.789	0.0169	0	0.102	16.1	0.632	43.1	24.1	8.33	14.9	9.93	2.4	39.7	8.24
CD304	26.9	25	26.1	19.8	41.8	38.6	1.63	0.319	1.03	0.414	0	0.87	0.0218	1.67	84.9	22.8	0.883	0.0926	0.114	0	0.146	1.96	0.581	37.3	0.014	0	0.0204	4.37	3.38	7	0.0714	1.31	0.213	23.4	0.039	0.557	0.0394	1.2	0	99.1	44.6	72.1	88.6	97	84	14.6	2.94	23.4	30.7
CD305	80	82.1	83.9	0.569	0.754	0.402	0.0303	0.233	0.326	0.0907	0	0	0.042	0.365	0.0642	0.575	0.122	0.00914	0.108	0	0.0975	0	0.349	0.0521	0.0106	0	0.0156	0	0.0831	0.0864	0.0214	0.106	0.0132	0.0318	0.0518	0	0.0635	0.234	0	7.2	2.59	19.2	24.8	2.71	1.33	76.8	44.9	68.5	84.3
CD307	21.9	14.1	13.6	0.0989	0.0625	0.158	0.1	0.195	0.165	0.0447	0	0	0	0.111	0	0.432	0.195	0	0.0692	0	0.0749	0	0.202	0.11	0.0106	0	0.0274	0.0237	0.173	0.125	0	0.056	0.0188	0.0804	0	0.031	0.00548	0.472	0.0276	15.4	0.278	3.97	24.4	4.71	0.865	10.5	1.83	4.88	17.1
CD309	36.6	34.9	42.5	0.589	0.574	2.46	3.67	9.92	15.8	0.183	0	0.152	0.0668	0.383	0.145	0.648	0.497	0.0271	1.15	0	0.0613	0.173	0.0703	0.195	0.0315	0.0777	0.213	0.0878	99.4	65.8	0.169	99	0.0952	99.8	0.183	0.11	0.128	0.927	0	18.8	0.484	17.4	29.7	5.94	5.74	39.4	13.9	16.3	42.9
CD31	58.4	60.4	60.8	0.0714	0.283	0.296	0.115	0.196	0.203	0.00746	0.1	0.0299	0	0.149	0.0232	0.211	0.0763	0.00969	0.0314	0	9.88	0	8.61	7.04	0	0	0.0123	0	0.0479	0.0136	0.014	0.0115	0.00847	0	0	0.0277	0	0.058	0	11	4.41	27.6	30.7	8.1	20.6	65.3	77.7	73.3	76.5
CD312	52.5	54.5	55.6	1.12	0.881	1.01	4.51	2.8	4.9	0.44	0	0.354	0.256	4.52	0.18	2.69	0.51	0.178	13.6	0.188	0.144	0	0.406	0.361	0.292	0.378	0.538	0.336	11.9	5.4	0.305	8.08	0.314	20.3	0.322	0.538	0.399	0.815	0.267	30.3	6.88	48	58.3	22.7	20.7	53.5	36.8	57.7	75.8
CD314	58.8	15.4	19.2	0.89	2.01	3.35	3.4	1.29	2.83	0.246	0	0.211	0.0931	1.01	0.125	3.34	1.48	0.44	0.958	0.138	0.226	0.271	0.0697	0.157	0.16	0.146	0.724	0.668	0.67	0.422	0.859	0.5	0.795	0.845	0.632	1.15	0.149	1.48	0.0339	8.79	6.62	20	7.76	4.06	6.09	16.3	29.7	34.4	17.6
CD317	61.5	62.7	68.9	96.7	98.2	96.6	0.0973	11.7	22.8	94	6.19	34.1	51.5	67.5	24.2	47	74.5	0.185	2.8	0.0457	94.5	1.7	48.7	52.3	0.57	2.13	0.796	0.266	19.7	2.82	14.6	13.4	8.8	14.4	6.91	6.93	26.3	48.7	37.5	8.92	29.8	0	29.7	77.9	63.6	30.7	40.1	52.8	55.1
CD318	28.8	34.3	44	100	100	99.9	99.9	0.0814	0.0203	98	87.8	99.1	99.9	99.3	98.1	99.8	94.9	92.9	99.9	99.2	97.7	22.5	98.4	79.6	14	3.61	7.32	78.7	58.4	89.3	30.3	75.5	41.6	88.6	8.08	43.1	0.368	76.2	0	72.1	73.6	4.75	54.1	88.3	62	36.7	20.3	16	48.1
CD319	49.6	52.2	58.8	1.23	1.71	2.47	1.73	0.464	1.13	0.0808	0	0.332	0.502	1.14	0.0722	3.58	1.52	0.0478	0.0304	0	0.136	0	0.236	0.155	0.0647	0	0.17	0.0161	0.174	0.231	0.154	0.166	0.0719	0.217	0.141	0.037	0.0598	1.46	0.0839	40.6	3.03	15.2	59.7	26.7	33.2	47.9	26.7	50.3	77.6
CD32	49.8	57.9	58	0.246	0.0706	0.171	0.36	0.0583	0.0996	0.282	0.181	0.318	0.375	2.86	0.227	0.301	0.19	0.0941	0.835	0.185	0.326	0	0.0617	0.166	0.0134	0	0.0167	0.0475	0.896	0.595	0.141	0.531	0.125	0.565	0.212	0.187	0.0813	0.172	0	41.4	31.5	15.4	61.9	11.3	9.43	71.1	38.9	44.4	73.4
CD321	80.8	86.1	88	88.4	90	87.8	100	100	99.8	98	69.2	81.6	84.6	96.4	97.5	100	99.4	96.7	96.4	94.6	38.5	0.0362	95.5	3.33	0.131	0.0394	8.3	0.0843	1.97	2.88	0.407	5.37	0.588	3.15	0.992	7.17	0.0572	2.81	6.9	97.7	98	92.6	98.5	98.8	89	90.8	79.5	88.2	95.4
CD322	12.8	10.1	20.4	0.229	0.228	0.731	0.251	3.27	3.48	1.55	0	0.341	0.0942	7.46	1.36	0.961	0.743	0.339	1.3	0.115	0.154	0.213	0.491	0.334	1.63	4.6	0.54	0.786	2.05	3.05	0.189	0.802	1.05	7.42	0.214	3.89	2.65	0.767	14.9	4.25	0.706	4.36	6.02	1.6	3.42	5.07	1.01	2.3	3.05
CD324	13.1	13.2	17.5	0.0323	0.039	0.157	0.411	1.33	3.79	0.0684	0	0.197	0.0229	1.04	0.00823	0.259	0.199	0.0101	0.0647	0	0.165	0.00876	0	0.0364	0.0229	0.0303	0	0.0085	0	0.0147	0.0225	0.0239	0.0137	0.0314	0	0	0	0.0914	0	38.7	0.358	0.935	4.94	27.5	31	9.59	0.767	10.1	9.25
CD325	29.8	22	20.5	0.0527	0.0679	0.117	0.136	0.122	0.382	0.0405	0	0	0	0.101	0.00628	0.547	0.0273	0	3.17	0	0.0203	0	0.163	0.0887	0	0	0.0168	0.0112	0.0863	0.142	0	0.0931	0.0244	0.0986	0	0.0369	0.00539	0.823	0.0288	96.3	0.477	14.7	39.2	98	17.7	7.32	1.84	16.2	25.3
CD326	1.51	1.26	3.38	87.1	79.9	67.4	99.9	99.7	99.8	0.327	0	71.1	81.3	71.2	49.9	99.5	94.8	33	96.6	80.9	0.166	0.0295	0	0.292	0	0.087	0.314	2	4.21	2.79	1.01	3.73	0.558	2.2	0.51	0.624	0.08	0.925	0.214	72.5	80.7	33.6	73.4	62.5	74.3	5.12	4.06	2.18	3.47
CD328	43.3	36.5	44.9	0.405	0.124	0.408	0.375	0.847	1.25	0.0537	0	0.0303	0.0358	3.24	0.0397	0.465	0.134	0.00915	0.376	0	0.186	0.0185	0	0.229	0.0209	0	0.0428	0.271	0.58	0.292	0.101	0.499	0.0472	0.507	0	0.0379	0.00511	0	0	34.8	0.575	37.1	60.8	4.64	0.701	32.4	3.64	33.2	46.7
CD33	15.7	26.6	26.4	0.359	0.348	0.369	1.25	0.489	1.72	5.53	0	0	0.0341	0.249	0.124	0.962	2.01	0.0327	0.185	0.19	0.206	0.0439	0.188	0.211	0.0717	0.0495	0.295	0.107	0.151	0.156	0.0187	0.0557	0.0448	0.167	0.0668	0.922	0.0323	0.118	0.103	5.19	0.497	4	14.5	6.11	1.06	45	34.2	32.2	63.5
CD332	10.9	4.04	3.22	0.0853	0.0787	0.59	0.0589	0.0843	0.0739	0.154	0.836	0.662	0.563	3.27	0.217	1.38	4.22	0.164	0.868	0.175	0.149	0.514	0	0.354	0.0215	0.0283	0.207	0.061	0.0753	0.107	0.0495	0.0972	0.141	0.259	0	0.259	0.426	1.76	0.0344	5.81	0.804	0	0.412	49.3	1.14	5.18	0.156	2.21	2.14
CD333	39.2	35.6	35.2	0.397	0.38	3.45	5.93	0.79	0.917	0.0827	0.318	0.678	0.305	9.58	0.00806	0.487	0.142	4.8	0.236	0.101	0.257	0.121	0.442	0.208	0.646	0.32	0.212	0.89	0.625	0.753	3.73	0.638	3.74	0.951	6.6	5.92	0	0.17	0.11	49.1	1.79	19.8	18.9	5.59	8.7	56.4	32.6	19.3	61.6
CD334	14.7	17.1	26.8	0.0509	0.0264	0.118	0.0529	0.0526	0.128	0.0268	0	0.0354	0.0223	0.0552	0.0135	0.686	0.0925	0	0.0383	0	0.0765	0	0	0.0826	0.0226	0	0	0.0161	0.164	0.0705	0	0.0676	0	0.0421	0	0.0374	0	3.17	0.0271	5.1	0.454	3.5	17	2.67	12.7	3.79	2.11	3.72	9.51
CD335	11.3	8.26	17.1	0.0424	0.0621	0.216	0.0118	0.0677	0.122	0.0376	0	0	0	0.0667	0.021	0.241	0.103	0	0.0276	0	0.181	0	0.0619	0	0.0108	0	0.0077	0.00784	0.0438	0.0207	0.0403	0.0159	0.0239	0	0	0	0.00482	0	0	1.56	0.358	3.93	18.2	0.49	0.243	2.61	3.19	12.1	10.8
CD336	2.52	1.39	7.45	0.0496	0.0315	0.119	0.0516	0.103	0.122	0.00923	0	0	0	0.0494	0.0138	0.363	0.066	0	0.0216	0	0.111	0	0.245	0.0522	0.0102	0	0.00802	0.0188	0.0336	0.0718	0.0213	0.0182	0	0.0435	0	0.0418	0.0157	0.401	0	0.312	0.424	0.276	7.78	0.323	0.346	1.96	1.73	0.493	5.58
CD337	50.5	47.9	56	3.35	3.22	4.43	16.8	32.3	41.8	1.19	6.82	3.59	4.23	16	0.893	6.8	1.24	16.5	10.5	2.9	1.01	0.585	1.74	1.81	3.75	2.72	8.54	10.1	39.5	48.4	26.8	46.6	26.4	65.9	25.8	21.3	1.83	20.4	0.623	28.8	8.46	35.4	67.4	20	12.3	20.6	6.85	19.7	48.3
CD338	49.5	31.5	24.5	0.182	0.264	0.741	9.48	8.06	14.9	0.281	0	1.12	0.865	1.18	0.856	7.82	0.164	0.0696	6.3	0	0.163	0	0.157	0.339	0.0421	0	0.0483	0.266	19.9	18	1.2	9.22	0.587	27.5	1.26	0.81	0.0387	20	0.268	30.2	5.5	45	58.4	22.3	10.8	20.1	4.69	35.4	39.4
CD339	17.8	18.1	31.7	0.114	0.0866	0.377	0.151	0.224	0.241	0.115	0	0.256	0.0265	0.305	0.0437	0.211	0.2	0.00914	0.597	0	0.0972	0.0465	0.0976	0.169	0.0597	0	0.0469	0.00905	0.0106	0.0152	0.0484	0.0366	0.0864	0.0596	0.237	0.174	0.0381	0.0947	0.0261	5.7	0.569	3.68	34.6	0.682	3.12	13.1	2.54	8.94	35.7
CD34	0.778	1.16	2.97	0.122	0.036	0.105	0.085	0.255	0.323	1.86	0.351	0	4.36	0.286	0.107	2.56	0	0.0143	2.19	0.214	0.261	2.12	0.123	0.108	0.0423	46.4	0.0605	0.0462	26.8	54.6	4.4	12.9	0.457	1.24	0.0704	0.484	0.243	3.2	8.92	3.82	8.24	4.58	63.2	0.833	20.2	3.2	2.52	1.49	4.99
CD340	0.92	1.28	1.74	99.7	99.8	99.3	96.9	94.1	88.1	98.5	36.1	88	59.3	95	85	99.8	98.3	70.4	99.2	88.6	11.4	83.4	43.7	15.3	48.4	79.9	85.9	99.8	99.6	99.6	88.9	99.7	93.6	99.4	81.2	93	55.9	83.1	4.16	98.1	93.6	86.5	94.4	69.1	75.3	6.74	2.91	2.25	4.72
CD344	49.7	49.9	42.9	86.9	94.6	89.2	2.53	3.68	3.75	2.55	1.97	59.5	5.55	54.1	0.485	1.92	84.9	0.0229	4.35	7.52	0.24	20	0.305	0.851	0.746	2.08	0.0416	1.04	27.8	24.1	2.64	22.9	1.99	46.9	2.54	4.18	0.591	4.69	0.057	43.9	1.52	42	55.3	4.62	3.61	30.9	4.04	42.9	43.5
CD349	15.9	22.6	32.3	1.17	1.68	0.331	0.0844	0.611	0.73	0.24	1.22	8.12	1.26	21.4	0.127	0.656	0.222	0.207	0.959	0.958	2.3	3.72	1.1	51.9	9.53	1.58	7.92	3.59	0.892	1.61	1.02	0.572	22.8	8.82	13	5.96	0.049	57.5	5.89	0.223	1.85	1.45	0.965	2.02	1.12	2.71	0.184	16.5	8.45
CD35	37.7	50.2	38.7	0.0611	0.0481	0.13	0.0461	0.047	0.0495	0.0397	0	0	0.0177	0.0843	0.0116	0.148	0.119	0.00463	0.02	0	0.108	0	0.0678	0.111	0.0104	0	0.0236	0.00785	0.0562	0.0269	0.019	0.0224	0	0.0543	0	0	0	0.0976	0.0871	0.28	0.368	0	0.468	0.226	0.107	17	7.35	6.51	11.3
CD351	32.4	34.7	6.64			1.77	16.3	0.939	2.68	0.195	0	0.25	0.289	23.7	0.169	4.08	0.657	1.37	1.09		0.57	0.279	1.04	0.693	2.8	1.93		0.894	1.5	1.79	1.83	1.28	1.15	0.916	2.52	1.8	0.292	7.37	0.847	17.8	4.06	56.4	16.2	35.3	1.07	11.5	4.79	45.1	6.67
CD352	81.1	73.1	78	0.0992	0.126	0.153	1.38	0.164	0.216	0.0691	0.552	0.412	0.459	2.91	0.0274	0.331	0.0656	3	0.063	0	0.0171	0.0128	0.0645	0.0955	0.0589	0.0307	0.0704	0.0587	0.585	0.339	0.447	0.475	0.349	0.462	1.01	0.235	0.0151	7.12	0	0.885	1.37	4.14	2.61	1.85	1.5	45.2	61.6	69.8	46.7
CD354	38.6	35.6	39.3	0.109	0.255	0.483	1.75	0.503	1.28	0.0174	0	0.0308	0.0607	1.7	0.00684	0.752	0.149	0.184	0.214	0	0.434	0	0.81	0.293	0.421	0.148	0.921	0.177	2.65	3.22	0.363	1.77	0.107	4.47	0.749	0.195	0.312	1.93	0.082	14.3	5.01	28.8	35.5	32.1	13.6	15.1	8.59	32.4	39.3
CD355	20.3	18.2	20.2	0.0899	0.0568	0.204	1.12	0.51	1.44	0.0434	0	0	0.0688	0.318	0	34.8	0.175	0.0229	0.0966	0.0743	0.107	0.0182	0.292	0.0733	0.0559	0	0.0327	0.0384	0.139	0.138	0.0215	0.123	0.0386	0.0366	0	0.0403	0	0.411	0	6.41	0.775	15	42.2	16.2	3.19	5.28	2.19	21.2	31.2
CD357	11.8	11.8	22.3			0.316	0.101	0.501	0.68	0.264	0.356	1.39	0.95	10.2	0.0996	0.784	3.41	0.272	0.193		0.124	0.0343	0	0.38	0.0611	0.032		0.0284	0.0269	0	1.64	0	2.04	0	4.59	5.16	0.0775	0	0	0.464	0.906	0.656	1.13	9.96	0.584	2.64	0.294	2.15	1.63
CD358	45.6	57	47.3	0.292	0.387	1.29	1.83	0.575	1.91	0.14	0	0.126	0.129	0.697	0.0649	0.672	0.0905	0.24	0.282	0.039	0.277	0.135	0.273	0.138	0.22	0.192	0.132	0.301	0.27	0.231	0.214	0.171	0.0964	0.154	0.136	0.0907	0.0371	0	0.0593	60.3	0.483	42.5	43.7	25.8	24.9	45.5	1.92	37.3	34.7
CD36	5.79	17.3	14.8	0.0476	0.0407	0.122	0.0611	0.0734	0.0448	0.0554	0	0.0292	0.0177	0.172	0.0075	0.292	0.0685	0	0.24	0	0.081	0.305	0.137	0.225	1.09	0	0.0233	0.186	0.0956	0.0424	0.0401	0.0116	0.012	0.029	0	0	0.0288	0.225	19.3	27.4	9.25	48.9	37.3	15.5	36.3	31.2	22.2	18.9	38.7
CD360 (BD)	24.4	25.7	42.1	0.0858	0.118	0.194	0.414	1.74	3.57	0.131	0	0.0651	0.0201	0.876	0.0367	0.877	0.137	0.0477	0.244	0	0.119	0.0156	0.0743	0.0574	0.0352	0	0.034	0.0295	0.42	0.55	0.273	0.137	0.0787	0.0465	0.203	0.0862	0.0351	0.545	0	5.18	0.105	36.5	49.8	3.38	0.937	7.27	2.74	36.6	40.8
CD360 (BL)	30.4	29.8	33.3			0.228	2.26	2.28	5.23	0.0541	0	0.145	0.13	1.61	0.0144	0.893	0.152	0.0736	0.205		0.0527	0	0.303	0.144	0.0761	0		0.1	0.123	0.205	0.362	0.0931	0.367	0.0539	0.463	0.697	0.00563	0	0.0316	7.31	1.01	30.3	49.9	7.06	1.17	6.38	2.44	32.8	35.1
CD37	6.08	13.1	25.6	0	0	0.0166	0.0198	0.0174	0.0654	0.0597	0.108	0.141	0	0	0	0.213	0	0.00484	0.00736	0	0.087	0	0	0.167	0	0.102	0	0	0	0	0	0.0141	0.0122	0.0363	0	0	0	0	0	0.461	0.136	1.46	1.52	0.194	0.183	18.1	0.292	0.18	1.26
CD38	36.8	33.7	43.6	15.6	1.79	2.01	9.35	0.285	0.729	0.0559	0	0.281	0.099	2.21	0.771	24.9	5.5	0.0202	1.48	0.279	1.04	58.5	11.4	0.285	0.572	0.517	0.129	0.768	99.5	98.4	0.425	97.1	0.917	99.7	0.242	0.271	1.46	1.59	0.277	2.88	9.71	5.56	24.3	36.2	2.56	37.8	54.7	41.7	47
CD39	22.7	28.3	28.9	0.0472	0.118	0.217	0.162	0.121	0.0736	0	0	0	0.0254	0.0863	0.0257	0.185	0.48	0.135	1.45	0.253	0.0576	0.305	0	0.249	0.214	14.9	1.28	0.22	48.8	41	10.1	60	1.02	6.07	0.0238	13.4	0.983	18.3	25.9	0.443	1.15	0.588	0.563	1.43	4.27	27.7	31.3	26.1	35.8
CD3e	56.5	51.1	46.9	0.0754	0.0879	0.27	0.287	0.0927	0.053	0.00891	0	0	0.0333	5.23	0.0331	0.377	0	0.349	0.066	0.0394	0.0949	0.107	0.348	0.401	0.0355	0	0.177	0.0257	0.0782	0.165	0.116	0.0569	0.0919	0.247	0.344	0.214	0.024	1.26	0	0.255	0.418	0	1.1	0.563	0.0951	2.42	12.5	33.6	12.4
CD4	50	42.6	42.9	0.0221	0.0271	0.104	0.0815	0.119	0.0375	0.0305	0	0.134	0.163	0.135	0.0114	0.245	0	0.00533	9.83	0	0.214	0.047	0.0668	0.0833	0	0	0.556	0.277	40.7	33.1	0.0189	24.3	0	47.8	0.0442	0.0728	0.0201	0.101	0	4.52	1.41	4.76	10.3	3.19	0.834	61	49	35.7	65
CD40	1.09	0.235	1.81	0.0787	0.0514	1.04	0.0722	0.0702	0.0433	0.0642	0	0.054	1.35	5.91	0.0123	4.86	12.5	0.00466	2.34	0	0.187	0	0.277	0.159	0	0	0.00824	0.0136	5.88	1.11	0	4.86	0	1.3	0	0	0	0.0436	0.0658	16.9	10.4	0	8.51	7.68	13.7	6.45	2.29	1.19	3.13
CD41a	30.7	33	21.6	0.026	0.0301	0.122	0.0885	0.0844	0.0816	0.0534	0	0	0.0208	0.098	0.0114	0.238	0.11	0.00545	0	0	0.15	0	0.233	0.259	0	0	0	0	0.0376	0.0274	0.0161	0	0	0.0575	0.0188	0	0	0.172	0.0298	0.897	0.61	0.549	1.76	2.89	5.91	2.18	3.39	1.58	5.45
CD41b	1.41	0.781	1.78	0.0172	0.028	0.0724	0.0264	0.0377	0.056	0.0539	0	0.119	0	0.0528	0.00936	0.253	0.0328	0	0.0756	0	0.0259	0	0.13	0.0739	0.0456	0.0542	0.011	0	0	0	0	0.0126	0.0146	0	0	0.0524	0	0	0	1.31	0.135	1.42	1.6	1.32	0.633	1.57	0.375	0.467	0.35
CD42a	26.1	30.1	21.7	0.0318	0.0594	0.112	0.119	0.101	0.0722	0.0399	0	0.22	0.24	2.24	0.0177	0.253	0.0224	2.95	0.0504	0	0.0426	0	0.0629	0.136	0	0	0.0224	0.00448	0.268	0.199	3.3	0.19	2.74	0.138	4.79	2.38	0	0.0399	0	1.96	1.28	3.51	8.14	1.87	2.06	2.71	3.96	2.77	6.12
CD42b	8.77	8.61	10.1	0.0921	0.0455	0.24	0.183	0.0378	0.0953	0.0801	0	0	0.0583	0.37	0	0.196	0.0775	0.00441	0.457	0	0.14	0.0963	0.181	0.131	0.0118	0	0.0561	0.00786	0.111	0.113	0.0208	0.163	0.0123	0.174	0.0249	0.0414	0	0.045	0	2.55	0.698	6.19	9.04	1.69	0.325	2.88	3.76	4.92	9.39
CD43	86.3	89.5	86.9	1.94	2.6	2.2	0.752	0.082	0.0537	0.103	0	0	0	0.072	0.0123	0.224	0.128	0.00491	0.0279	0	0.178	0	0.251	0.189	0	0	0.0151	0	0.347	0.42	0.0403	0.0821	0	0.0278	0.0467	0	0.0107	0.146	0.0641	4.59	0.838	3.51	4.31	4.47	0.62	63.1	71.1	83.9	67.9
CD44	99.2	99.4	99.6	100	99.8	99	17.9	40.3	88.1	77.2	23.9	77.2	85.6	96.4	73.8	99.9	99.8	39.6	99.3	87.7	70.8	99.5	27	79.4	87.7	99.7	99.9	99.4	99.1	98.7	92.7	98.8	99	99.4	73	97.7	100	92.1	35.8	14.1	39.4	4.86	27.9	92.1	14.8	92.5	94.2	96.1	93.1
CD45RA	58.7	55.6	50.7	0.0752	0.0559	0.127	0.882	0.0603	0.105	0.0489	0	0	0.0356	0.163	0	0.494	0	0.00998	0.156	0	0.198	0.0102	0	0.19	0	0	0.0225	0	0.0609	0.195	0	0.119	0.0357	0.0296	0.0232	0	0	0.0318	0	9.24	0.768	4.21	10.7	1.68	1.9	44.2	13.2	38	38.9
CD45RB	85.8	83.3	87.4	0.0807	0.0717	0.155	0.0705	0.0857	0.0753	0.0817	0	0	0.0364	0.0141	0.0116	0.357	0.098	0	0.0391	0	0.168	0	0.128	0.16	0.0323	0	0.0233	0	0.101	0.104	0	0.0483	0	0.0294	0.0218	0.0354	0.00527	0.115	0.0659	4.69	0.615	0	2.37	1.47	0.759	96.1	21.7	54.7	67.6
CD45RO	99.2	99.1	99.5	0.0387	0.0203	0.137	0.464	0.0676	0.0376	0.11	0	0.0265	0.0713	0.0998	0.0316	0.17	0	0.0802	0.117	0	0.234	0.0945	0.2	0.157	0	0	0.0377	0.0103	17.3	15.5	0.101	10.3	0.0488	20.1	0.117	0.0395	0.162	0.123	0	9.25	0.593	2.38	7.09	7.48	2.73	72.5	90.7	59.4	82.8
CD46	85.3	94.1	96	99.9	99.8	99.3	100	99.6	99.9	59.2	0	11.4	26.5	29.2	73.2	99.7	83.4	0.242	91.6	0.696	9.04	38.4	51.8	8.88	21	32.2	21.2	96.2	72.2	45.8	16.2	56.5	39.5	87.6	7.9	50.6	59.6	43.6	0.693	76.6	80	88.5	74.9	54.6	57.7	53	63.2	83	67.2
CD47	99.6	96.1	97.8	99.3	99.9	99.8	54.4	98.5	96.1	44.1	4.5	25.8	39.8	94.5	20.8	99.6	73.5	35.8	99.9	83.1	1.62	59.4	1.39	17.2	78.9	99.2	99.1	100	99.5	99.7	97.6	99.6	96.4	99.6	91.7	94.1	79.6	88.1	44.8	99.7	98.5	97.8	97	99.9	90.7	99	86	95.8	91.8
CD48	89.8	90.5	94.1	0.0507	0.0297	0.134	0	0.0903	0.0394	0.084	0	0.349	0.0454	0.27	0.0121	0.123	0.0517	0	0.0257	0	0.195	0	0.0615	0.258	0.0182	0	0.0111	0	0.0552	0.0955	0	0.0377	0.0157	0.0315	0.0921	0	0	0.12	0.0467	1.49	0.198	4.17	28.2	0.912	0.385	72.3	61.8	72.8	66.6
CD49a	9	9.11	11.8	44.8	46.8	46	81.1	42.4	43.5	2.11	1.1	2.3	15.1	78.2	73.7	22.2	98.8	10.5	83.6	1.17	16.1	97.8	3.84	32.6	80.7	32.7	81.5	92	97.5	99.3	78.9	98.2	71.3	97.3	65.8	78.4	42.9	83.8	18.7	99.4	57.9	98.5	96.2	99.7	91.5	32.6	10.1	23.4	27.5
CD49b	18.7	24	31.2	100	100	99.8	100	99.6	99.9	90.2	56.8	97.2	99.8	99.4	99.9	95.5	99.8	65.3	99.9	57.8	98.8	98.6	76.1	87.6	41.1	100	99.7	99	99.9	99.9	97	99.8	99.8	100	72	98.4	62.5	97.7	31.1	99.4	84.8	95.3	98.5	99.7	91.8	19.5	15.7	20.2	12.6
CD49c	8.54	7.51	15.5	100	100	99.9	72.4	30.6	60.4	54.8	72.8	90.1	98.2	98.8	98.4	99.9	100	96.1	99.9	97.5	63.8	96.6	79.2	93.1	11.4	5.19	79.2	70.5	97.6	74	27.3	97.4	21.8	97.9	8.74	40.5	41.4	92.4	18.4	98.4	95.7	97.4	95.3	100	91.2	31	11.9	15.8	21.2
CD49d	94.9	95.5	95.6	0.07	0.0837	0.166	0.901	4.33	4.58	0.0335	0.727	0.814	11	8.22	0.429	52.1	93	0.081	8.46	0.836	0.213	98.3	1.51	46	55.2	61.3	26.5	100	99.7	99.2	83.1	99.3	96.2	99.6	36.5	93.5	77.1	94	23.2	4.23	8.02	8.93	26.8	8.49	7.78	83.8	88.2	98.5	96.6
CD49e	74.4	80.9	81	99.2	100	99.8	28.4	94.7	98.5	98.8	27.6	51.3	88.8	92.7	74.6	99.2	79.2	2.03	99.8	29.5	99.2	96.2	82.4	99.1	100	99.9	100	100	99.9	99.9	99.5	99.9	99.8	99.8	99.4	99.3	99.7	98.1	99.6	98.3	94.7	56.9	94.4	92	84.8	66.9	56.6	73.1	87.1
CD49f	75.5	77.3	73.4	100	100	99.8	12.1	9.91	35	34.5	30.3	86.8	78.9	97.8	91.2	69	100	17	99.3	31.7	2.08	93.8	14.5	21.7	10.6	79.6	81.3	97.1	98.7	98.7	53.2	95.2	40.3	99	20.6	82.8	16	27.8	28	98.6	85.9	98	97.2	99.7	88.9	48.9	45.9	45.4	75.1
CD5	62.1	66.6	71.2	0.0181	0.0574	0.153	0.0563	0.058	0.0714	0.0292	0	0.0335	0.0628	0.0868	0.0168	0.156	0.0741	0.0729	0.0141	0	0.093	0	0.122	0.1	0	0	0.0156	0.0153	0.0807	0.0448	0.0546	0.0352	0.0224	0.157	0	0.0365	0	0	0.032	23.9	1.31	4.22	4.16	9.82	0.908	38.3	53	52.5	36.5
CD50	99.6	99.4	99.4	0.0164	0.0211	0.104	0.0738	0.0473	0.0601	0.01	0.254	0.353	0.0266	0.0802	0	0.277	0.177	0	0.00792	0	0.251	0.00957	0.406	0.257	0.0246	0	0.0107	0.00922	0	0.0518	0	0.837	0.0136	0	0	0.0437	0	0.0376	0	0.612	0.837	4.81	3.11	0.723	0.19	69.2	77	80.6	66.6
CD51/CD61	3.73	2.33	11.1	30.1	26.9	34	14.2	0.206	0.287	26.1	85.4	82.9	92.7	98.2	64.6	99.8	99.9	99.1	100	95.4	16.9	98.3	9.81	6.81	6.54	55.9	14.4	67.1	93.3	97.7	29.4	98.8	4.55	90.5	14.8	48.8	46.6	82.6	4.06	90.5	56.9	16.8	86.1	52.4	85.3	23.1	4.9	7.42	20.2
CD52	88.9	90.3	93.2	0.0901	0.0866	0.186	0.101	0.0732	0.0889	0.0415	0	0.0294	0.0354	0.067	0.0119	0.343	0.123	0.0101	0.0848	0	0	0	0	0	0.025	0	0.0331	0	0.0427	0.063	0.0368	0.0123	0.0115	0.0611	0.0219	0.0355	0.0129	0.0529	0	47.6	0.452	2.46	16.1	18.9	2.05	64.7	50.7	58	56.6
CD53	85	80.1	89.3	0.0411	0.0689	0.131	0.119	0.103	0.0707	0.0344	0	0.0413	0.0247	0.0404	0.0123	0.12	0.127	0.00516	0.0273	0	0.177	0	0.0599	0.153	0.00974	0	0.0223	0.0173	0.0613	0.145	0.0202	0.0357	0	0.0297	0.0485	0.0781	0	1.3	0	9.01	5.65	0	8.46	7.99	3.16	76.3	51.8	66.8	88.8
CD54	66.1	70.3	70.5	99.6	99.7	98.1	13.1	30.4	44	100	93.7	99.6	99.5	99.6	99.7	100	100	98.9	98.5	99.3	99	99.2	98.8	50.4	96.9	98.5	99.7	66.2	96.5	95.8	90.9	99.5	96.2	98.2	86.8	95.7	86.6	96.7	64.6	62.5	97.3	98.4	98.5	99.9	92.2	90	95	96.9	94.6
CD55	94.2	93.9	94.5	99.9	99.9	99.8	98.3	99.7	99.8	99.9	77.6	98.1	99.8	98.8	99.4	74.6	99.9	51.6	98.5	33.3	78.4	100	94	92.8	99.8	100	100	100	100	100	99.8	100	99.9	100	100	99.8	99	99.1	88.3	98.3	78	39.1	93.7	86.6	67.8	86.9	65.7	60.9	74.8
CD56	26.8	32.6	14.8	14.4	3.72	1.59	0.178	0.0635	0.0867	17	18.2	40.9	1.07	75.2	53.5	38.3	99.4	26.6	65.3	11	1.2	5.95	0.824	0.54	0.0572	0	0.425	0.631	0.117	0.157	0.234	0.127	1.02	3.1	0.459	0.573	3.32	0	1.24	55.4	13.4	47.5	79.4	95	55.6	9.36	7.2	18.9	26.9
CD57	11.4	10.9	14.4	0.0158	0.00377	0.0813	0.143	0.153	0.288	0.0399	0.129	0.421	0.0848	3.7	0.0181	70.6	0	0	5.67	0.171	4.52	0.0357	0.593	0.191	0.0598	0	0.0345	0.486	0	0.0305	0	0.0124	0.117	0	0.0273	0.133	0.0058	0.0844	0.0356	10.4	1.43	20.6	3.27	3.76	0.19	1.8	17.1	22.7	3.39
CD58	86.8	89.1	89	100	100	99.7	100	99.8	99.9	99.8	86.1	93.8	97.6	99.4	98.5	100	99.9	97.3	99.3	92.3	86.1	99.7	95.6	56.6	84.9	92.2	99.7	99.8	99.9	99.9	93.8	99.9	99.2	99.9	96.7	93.4	99.5	95.6	76.1	99.7	97.9	98.7	99	99.9	93.1	95.1	94	98	99.7
CD59	39.2	44.8	45.4	100	99.9	99.8	99.9	99	99.3	44	75.3	67.5	93.5	98.5	95.6	100	100	98.9	99.9	75.5	46.4	99.6	89.5	98.5	100	100	100	100	100	100	100	100	99.9	100	99.9	99.8	99.9	98.7	99.2	99.8	99.8	98.7	98.8	99.9	95.3	67	37.6	59.9	85.9
CD6	62	63.9	66.8	0.402	0.636	0.553	0.125	0.119	0.105	0.0234	0.283	16.8	16	0.301	0.0236	0.254	0	0.167	54.2	0.276	0.136	40.3	0.229	1.59	0.226	1.19	56.7	24.7	99.5	99.5	15.4	98.5	6.39	99.9	12.9	13.1	0.018	0.215	0.128	43.8	3.28	9.51	22	32.1	1.04	52.7	39.4	49.8	44.9
CD60b	67.2	72.3	75	0.218	0.272	1.35	3.07	2.64	13	0.608	1.14	0.537	0.448	3.96	0.114	0.707	0.441	72	2.23	0.191	0.235	0.112	0.477	0.413	27.7	86	0.606	2.58	20.7	10.3	12.4	23	2.68	3.75	2.47	16	8.27	0.371	0.0888	44.4	12.3	33.8	24.8	30.7	16.3	45.2	55.1	64.7	46.1
CD61	28.1	43	21.8	93.4	43.2	8.01	0.0625	0.0746	0.171	1.09	31.3	50.1	22.7	92.2	7.07	95.1	99	71.4	99.9	31.2	0.365	69.8	0.267	0.27	0.37	4.38	0.396	21.1	63.1	66.8	10.3	79.2	0.659	50.8	0.919	7.01	2.6	45.8	0.323	81.8	53.3	0	92.6	37.4	81.9	13.4	4.26	1.93	12.2
CD62E	18.1	1.46	6.41	0.467	0.329	0.461	8.46	0.0962	0.175	0.0465	0.806	0.467	0.727	0.597	0.0423	5.04	5.41	0.119	0.871	0.453	0.175	0	0.302	0.0311	0.024	0	0.14	0.216	1.28	0.954	0.832	0.977	0.158	0.8	0.269	0.908	0.673	9.59	0	1.49	2.04	28.6	37.3	18.8	0.728	2.23	1.4	15.2	27.2
CD62L	54	49.8	54	0.147	0.153	0.308	1.43	0.346	0.517	0.0601	0	0	0.0598	0.164	0.0227	0.232	0.0776	0.0457	0.16	0	•	0	•	•	0.0311	0.022	0.203	0.148	0.0639	0.0612	0.167	0.0123	0.418	0.0303	0.529	0.368	0.00509	25	0.286	0.853	0.643	1.67	5.62	0.567	0.321	3.83	2.85	11.5	9.77
CD62P	27.4	24.7	24.5	55.9	2.2	0.19	0.0463	0.0788	0.0587	1.01	0	0.942	2.04	3.37	0.788	0.303	50.9	0.0926	1	1.12	1.91	0.294	7.01	1.79	0.433	0.557	1	0.27	1.78	1.78	0.265	1.78	0.301	1.66	0.243	0.452	0.0103	0.266	0.0896	3.06	4.03	1.78	10.2	0.371	1.2	3.88	2.74	1.4	3.97
CD63	68.4	54.3	41.4	100	98.3	99.2	99.9	99.7	99.9	14.9	17.7	24	1.63	74.7	7.35	98.5	91.4	26.7	98.8	48.4	6.95	99.9	2.7	46	70	97.2	99.8	99.5	99.9	99.9	98.6	99.9	92	99.7	89.7	91.9	94.6	94.1	53.6	99.5	96.7	84.5	97.6	99.9	94.8	63.8	40.2	52.6	71.9
CD64	27.3	23.8	26.4	0.0197	0.0395	0.119	0.0518	0.117	0.0709	0.0373	0	0.0935	0	0.163	0.041	0.703	1.7	0	0.0324	0.073	0.0811	0	0.134	0.145	0	0	0.0476	0.00452	0.0402	0.014	0	0.0579	0	0	0.0236	0	0.00598	0	0	1.47	1.38	0.267	2.26	1.26	2.88	40.9	30.3	24.5	55.3
CD65	5.47	14.5	15	0.205	0.23	0.318	0.453	0.134	0.303	0.074	0	9.31	4.26	4.34	0.0214	1.09	0	0.0624	0.364	0	0.15	0.0197	0.773	0.12	0.0839	0.0319	0.124	0.225	0.0159	0	0.514	0.0515	0.39	0.0803	0.957	1.74	0.00913	1.85	0	5.53	0.615	6.25	4.89	0.917	2.28	5.75	0.757	1.5	8.14
CD65s	41.8	37.5	36.7	0.107	0.044	0.583	0.223	0.28	0.46	0.0689	0	6.69	0.813	2.71	0.0177	0.456	0.173	0.0242	0.736	0	0.0433	0	0.113	0.153	0.0814	0.0283	0.541	0.0273	0.0537	0.242	0.153	1.01	0.401	0.107	0.387	0.802	0.118	0	0	34.1	1.62	8.13	9.14	4.92	1.67	22	1.82	7.66	14.1
CD66	38	10.1	15.2	21.1	4.36	1.64	0.0669	1.12	9.25	0.391	0	6.64	1.48	5.93	0.0997	14.4	64	0.0138	0.401	0.845	1.11	0.0761	1.19	0.562	0.023	0.102	0.0693	0.233	1.32	1.15	0.373	1.18	2.01	1.04	0.688	1.13	0.00502	0.146	0.167	4.72	52.2	1.03	5.84	24.3	0.821	14.1	5.94	7.66	10.7
CD66b	0.455	0.731	2.79	0.0241	0.014	0.114	0.03	0.0687	0.0906	0.0564	0.253	0.218	0.0519	0.146	0.0395	0.148	0	0	0.0581	0	0.0383	0.00872	0.18	0.193	0.0375	0.0322	0.00898	0.0502	0	0	0	0.0112	0.0357	0	0	0.0726	0.0151	0	0.0324	0.48	0.407	0	1.13	0.578	0.538	0.683	0.623	0.13	0.79
CD66c	42.2	27.8	38.8	2.25	0.769	4.82	1.23	4.42	16.4	0.25	0.399	7.5	4.41	4.94	0.177	35.1	5.07	0.113	2.22	0.738	0.428	6	0.764	1.38	0.624	0.392	0.181	1.19	11.6	12.1	4.9	12.8	3.46	12.3	6.16	4	0.035	0.374	0	62	26.1	36.6	54.3	60.9	38	8.36	3.87	24.7	33.3
CD66d	18.2	16.9	24			2.92	1.42	0.827	4.86	0.339	0.366	5.01	1.27	4.39	0.102	0.798	26.9	0.492	0.821		0.379	0.277	0.592	0.359	0.309	0.121		2.08	0.589	0.546	0.298	0.373	0.181	0.593	0.141	0.288	0.206	0.469	0	31.3	38.4	8.18	11.1	15.4	5.28	32	6.07	9.81	17.9
CD66e	32.9	31.2	37.8			2.01	43.8	29	30.3	4.48	0	0	0	2.23	2.93	7.45	65.9	0.481	3.62		0.24	41.7	0.985	2.77	57	79.9		74.2	97.4	97.6	57	98.1	17.7	90.9	58.1	57.5	90.2	56.7	24.5	76.4	62.1	54.3	94.3	89.1	86	61.9	36	47.1	70.2
CD69	24.6	1.1	3.08	0.0851	0.0492	0.157	0.0622	0.0626	0.0784	0.0429	0	0.0612	4.17	0.382	0.0309	0.408	0.719	0.0185	0.0633	0	0.165	0	0.0714	0.0596	0	0	0.00836	0	0.204	0.187	0	0.107	0.027	0.133	0.0553	0	0.0586	0.417	0.0915	4.22	0.351	1.48	1.42	11.3	0.945	46.2	49	36.7	28.4
CD7	64.1	54.8	60.6	0.0668	0.0683	0.183	0.149	0.0527	0.0928	0.0167	0	1.7	1.16	0.415	0.0126	0.468	0.191	0.0178	27.5	0	0.217	0.0637	0.494	0.203	0.436	0	1.34	1.02	77.7	72.5	1.37	66.7	0.408	87.2	0.809	0.653	0.00554	0.308	0.0313	8.06	0.412	2.83	8.28	14.6	0.336	37.1	52.5	41.8	36.2
CD70	16.4	9.27	15.3	0.0552	0.0304	0.15	0.0844	0.146	0.277	62.9	21.6	11.9	55.5	63.8	23.6	99.5	99.9	6.59	22.4	3.18	0.269	0	0.185	0.108	0.298	0	0.0223	0.0053	0.114	0.045	0.0188	0	0	0.041	0.677	0.0391	0.00504	0	0.62	98.8	76.6	39	29.1	99.7	89.1	20.3	6.8	5.61	7.65
CD71	18.2	22.5	28.9	98.3	95.1	96.6	65.6	90.9	44	2.42	0.234	0.342	1.32	47.3	19.8	67.6	27.7	0.126	14.3	0.0839	1.27	22.2	3.14	10.1	0.181	0.0613	0.119	46.5	35.2	31.6	0.415	33.4	4.68	74.3	0.0914	6.99	38.1	3.23	0.134	94.9	57	42.5	85.1	91.1	76.1	45.4	9.81	10.1	20
CD72	11	11.7	18.4	0.0395	0.0147	0.168	0.0264	0.0343	0.0859	0.0335	0	0.161	0.0201	0.0443	0.00646	0.263	0.0962	0.00463	0.0601	0	0.0728	0.0231	0.187	0.158	0	0.0921	0.0441	0.0107	0	0.0317	0	0.711	0.0133	0.063	0	0	0	0.213	0	0.978	0.675	1.38	1.84	0.32	0.2	5.24	2.2	3.38	3.83
CD73	38.8	30.5	27.3	100	100	99.8	6	2.73	8.23	7.02	35.9	39.5	95.8	95.1	47.3	99	99.9	27	99.9	21.4	73.4	100	22.5	99.4	86.8	100	99.9	100	100	100	99.7	99.9	99.7	100	97.3	98.8	99.9	97.6	99.4	80.4	59.2	21.9	81.9	96.9	47.6	18.7	10.1	5.45	10.2
CD74	17.7	27.1	35.9	4.14	5.83	10	0.0632	0.0613	0.0864	0.0455	0	0.189	0	0.14	0.0158	0.17	0.0311	0.0049	0.13	0	0.154	0	0.123	0.138	0.023	0	0.0118	0.0126	0.00901	0.0386	0	0	0.0255	0	0	0.0801	0	0	0	2.34	0.861	3.26	3.03	3.49	0.358	43	20	26.1	36.6
CD75	3.77	9.51	18.5	0.0262	0.0179	0.102	0.109	0.112	0.098	0.0529	0	0.272	0	0.29	0	0.157	0	0.00525	0.0484	0	0.0246	0.0372	0.136	0.11	0.144	0.302	0.0223	0.004	0	0.0459	0	0.0366	0.0279	0	0	0.046	0	0	0	0.439	0.194	0.922	2.08	0.245	2.32	0.508	0.129	0.315	0.205
CD77	10.8	15.1	26.6	0.574	0.0311	0.214	0.0357	0.191	0.211	0.322	0	0.314	0.0988	1.57	0.244	7.32	0.0475	0.178	1.45	0.49	0.514	0.149	0.229	0.453	8	0.2	0.342	11.9	0.756	1.95	0.162	1.43	0.234	1.3	0.306	0.365	0.078	0.0774	0.219	7.61	3.28	1.19	1.73	0.855	6.23	1.86	6.3	3.96	0.811
CD79a	25.7	19.8	33.6	0.0436	0.0453	0.139	0.0227	0.0874	0.0728	0.0194	0	0	0.0211	0.104	0.0146	0.322	0.129	0.0094	0	0	0.168	0	0.0645	0.216	0	0	0.0147	0.0119	0.0998	0	0	0	0.0116	0.0433	0.0231	0	0	0.092	0	0.403	0.347	0.792	1.66	0.319	3.47	1.41	2.07	0.842	2.92
CD79b	54.9	2.79	21.8	0.613	0.146	0.398	0.277	2.23	3.09	0.0286	0.165	0.675	0.108	8.85	0.0497	0.505	0.221	4.89	0.601	0	0.121	0.0901	0.175	0.211	0.0246	0	0.0538	0.203	0.2	0.0881	2.83	0.0979	2.31	0.301	4.67	2.51	0.02	6.01	0.0384	23.4	1.78	3.64	20.8	17.2	2.78	16.6	1.79	4.79	17.2
CD8	25.8	25.5	33.9	0.0332	0.0508	0.0803	0.0821	0.0938	0.066	0.0449	0	0.0569	0.068	0.0927	0	0.221	0.0649	0.0473	•	0	0.241	0.00921	0	0.312	•	•	0.0343	0.0109	0.191	0.162	0	0.112	0.0172	0.0553	0	0.0283	0	0.0279	0	1.3	6.68	1.85	1.76	11.6	3.96	13.5	43	30.7	14.4
CD80	28.1	19.4	35	0.0503	0.0705	0.149	0.143	0.481	2.54	0.0931	0	0	0.0361	0.116	0.0216	0.733	0.129	0.0291	0.0981	0	0.489	0	0.275	0.19	0.011	0	0.0458	0.235	0.294	0.178	0.116	0.292	0.105	0.208	0.113	0.186	0.00517	2	0.0336	1.37	0.552	1.67	29.7	1.45	0.403	9.69	7.18	13.7	27.5
CD81	80.1	67.8	83.1	99.5	98	98.8	99.9	99.9	99.7	74.2	38	54	45.7	93.4	93.8	99.7	99.9	84.7	99.8	67	34.2	100	43.4	77.6	98.9	99	99.6	99.9	99.5	99.5	98.2	99.8	98	99.6	97.3	96.4	100	92.2	97.7	98.7	91.6	98.4	97.2	99.8	91.8	75.1	34.8	76.7	72.6
CD82	90	89.6	90.8	68.2	48.8	76.2	0.149	0.0778	0.127	79.3	0	0.208	0	93.1	85.9	92.5	98.3	0.0456	2.04	0.166	0.474	7.69	0.392	0.0953	0.558	0.869	0.227	0.12	0.132	0.113	0.0956	0.782	0.13	0.585	0.0289	0.185	52	0	0	76.1	51.6	63.7	66.6	68.6	36.3	84.4	76	77.2	83.6
CD83	38.9	22.7	40.1	0.265	0.115	0.79	0.48	0.15	0.182	0.0429	0	0.115	0.109	2.58	0.0134	0.692	0.0847	0.00961	0.221	0	0.125	0	0.0802	0.23	0.012	0.0289	0.08	0.111	0.308	0.498	0.363	0.415	0.43	0.353	0.76	0.648	0.0147	0.345	0	3.75	1.15	11.7	35.2	4.59	2.91	8.39	4.14	16.2	26.1
CD84	71.7	73.9	77.1	0.0433	0.45	0.187	0.0805	0.0951	0.0705	0.181	0	0	0.0544	0.348	0.0971	0.766	0.167	0	0.0236	0	0.0617	0.00934	0.258	0.11	0	0	0.0129	0	0.14	0.266	0.0193	0.229	0	0.102	0.0233	0	0.131	0.0353	0.0884	26.8	3.95	21	52.1	73	49.1	76.5	71.3	67.7	82.2
CD85a	40.1	32.6	41.6	0.387	0.337	0.322	0.626	0.13	0.125	0.0394	0	0	0	0.0613	0	0.812	0.0689	0.0244	0.298	0	0.152	0.0216	0.293	0.167	0.0391	0	0.268	0.0642	1.21	1.38	0.293	1.23	0.116	1.24	0.877	0.285	0	0.209	0.0301	0.308	0.695	11.1	22.4	8.25	3.75	13.8	27.7	35.1	43.2
CD85d	40.2	29.1	34.2	0.19	0.151	0.189	1.67	0.104	0.172	0.00786	0	0	0	0.547	0.0179	0.795	0.273	0	0.306	0	0.0495	0	0.209	0.14	0.0395	0	0.0645	0.0189	0.183	0.191	0.104	0.0948	0.104	0.233	0.099	0	0.0105	0	0	2.46	0	22.6	38.4	37.3	13.1	11.2	6.62	35.4	46.9
CD85g	25.8	22.8	29.1	2.51	3.76	1.52	0.0792	0.073	0.0992	0.0255	0	0.0985	0.0984	0.243	0.0192	0.239	0.0961	0	0.717	0	0.0695	0.0083	0.213	0.141	0	0	0.017	0.0116	0.0858	0.0704	0	0.0552	0	0.0551	0	0.0764	0	0.205	0.0311	3.51	0.895	0.645	3.8	35.1	17.5	3.38	1.64	0.343	4.91
CD85h	34.1	32.5	42	0.0758	0.0645	0.216	0.337	0.0926	0.0573	0.0483	0	0	0.0176	0.239	0.0125	0.601	0	0	0.101	0	0.0637	0	0.0923	0.19	0.0264	0	0.025	0	0.0849	0.235	0.0193	0.122	0	0.03	0.0236	0	0.0159	0.0314	0	1.82	0.538	12.6	42.4	24.1	18.6	19.1	12.8	26.8	48.7
CD85j	53.3	44	51.8	0.252	0.319	0.61	0.948	0.545	1.12	0.134	0	0.274	0.144	4	0.0606	0.433	0.375	0.0472	0.195	0	0.296	0	0.0734	0.209	0.0824	0	0.0512	0.0282	0.0542	0	0.788	0	0.505	0	0.912	0.634	0.0357	0.468	0	22.9	0.877	26.4	39.3	1.74	0.923	48.7	21.6	40.4	58.5
CD86	52.8	47.4	55.6	1.1	0.222	0.628	1.26	3.96	4.69	0.0386	0	0.0606	0.0913	1.47	0.05	0.236	0.104	0	0.577	0	0.315	0	0.299	0.105	0.0206	0.0222	0.052	0.407	1.22	0.878	0.179	1.23	0.0232	2.64	0.0674	0.0384	0.17	0.27	0.0637	19.5	2.1	12.4	52.9	1.34	0.288	45.9	25.6	33.3	62.5
CD87	21.9	10.6	16.2	14.7	1.97	1.13	0.0618	0.0759	0.166	0	0	0	0.0359	9.18	0.041	4.53	30	0.00904	1.25	0.0309	0.349	0.364	0.242	0.305	0.401	0.604	0.00743	1.05	13	6.24	4.02	6.21	2.75	6.5	0.762	1.18	0.761	0.0589	0.38	0.331	1.55	0.996	1.73	0.275	0.221	2.02	3.06	3.5	2.67
CD88	11.5	3.95	15.1	0.0611	0.0618	0.124	0.205	0.0792	0.134	0.146	0	0	0.0554	0.393	0.0976	0.401	0.1	0.0141	0.119	0	0.299	0	0.26	0.19	0.0308	0	0.0381	0.0168	0.0261	0.038	0.0207	0	0.0121	0	0	0	0.161	0.0822	0	0.33	0.467	3.93	0.491	0.348	1.28	3.27	2.49	9.83	0.783
CD89	36.9	23.6	29.2	0.0676	0.0694	0.144	0.131	0.158	0.127	0.198	0	0.0301	0.038	0.352	0.132	0.272	0.17	0.0311	0.166	0	0.187	0	0.0611	0.208	0.011	0	0.0162	0.00576	0.0376	0.0544	0.0198	0	0	0.0966	0.0236	0.0773	0.0936	0.467	0	1.31	0.578	11	10	1.04	0.744	5.81	7.27	16.8	16.6
CD8b	21.6	18	30.3			0.219	0.0708	0.119	0.16	0.075	0	0	0	0.0899	0.0124	0.333	0.306	0.00937	0.0185	0	0.177	0	0.213	0.0263	0.0121	0		0.0305	0.0495	0.0684	0.0663	0.0181	0.0402	0	0.054	0.0424	0.14	1.48	0	7.24	0.288	4.19	10.2	20.2	3.12	10.4	13.5	26.1	14.1
CD9	32.9	12.7	12.6	92.6	89.3	91.8	100	99.8	99.1	0.128	7.15	14.7	47.1	86.6	42.2	11.9	99.9	15.3	99.1	31.3	0.268	97.7	2.43	21.4	76.4	94.7	99.3	99.7	99.4	99.4	94.7	99.6	96.8	99.6	95.7	92.8	3.39	89	69.7	96.6	81.3	97.4	96.1	100	92.2	74	22.3	21.9	52.7
CD90	43.7	12.5	7.1	1.08	0.962	0.998	7.7	1.28	3.63	4.29	43.7	20.4	8.93	10.1	4.53	11.5	0.624	1.35	33.4	9.6	98.2	100	94.6	93.8	100	99.7	100	97.9	99.9	99.9	99.9	99.9	99.9	99.9	100	99.8	99.9	99	95.1	87.2	74.7	20	92.4	82.4	5.13	51.7	37.1	21.3	43.1
CD91	26.3	27.6	26.4	22.5	33.8	19.1	0.0678	8.34	8.36	0.961	1.7	0.989	5.48	24.4	1.06	53.8	40.5	0.559	73	0.0393	19.7	20.2	2.44	40.1	11.7	37.8	89.7	91.2	86.3	86.2	31.8	83.4	61.6	98.7	22.7	56.5	75.2	30.9	10.4	52.4	72	70.3	91.4	90.7	61.8	26.2	23.8	21	47.5
CD92	36.5	33.3	46.5	0.913	0.619	1.86	99.1	37.4	15.3	1.87	0.322	0.317	0.33	9.28	2.32	34.7	62.4	2.74	8.83	0.332	0.308	1.86	0.399	0.398	39.6	17.7	79.7	9.95	98.1	97.2	58.5	95	26.9	75	42.8	18.5	23	41.5	2.14	53.3	17.3	46.5	53.6	73.6	35	33.8	19.4	53.8	61.4
CD94	19	14	19.1	0.119	0.104	0.16	0.0773	0.0707	0.109	0.0183	0	0	0.0193	0.0275	0.00706	0.286	0.124	0	0	0.1	0.127	0	0.303	0.112	0	0	0.0367	0.00608	0.319	0.419	0.0557	0.3	0	0.448	0	0.0772	0.00938	0	0	0.19	1.14	1.4	1.12	0.437	0.137	2.61	6.18	11.6	7.07
CD95	52.5	50.4	58.2	34.1	30	35.9	100	66.8	79	16	20.5	46.6	60.2	96.8	74.5	99.9	100	56.9	99.9	79.2	9.05	98.8	67.1	21.2	81.2	95.8	99.9	100	98.5	97.9	95	99	91.5	95.2	89.5	90.6	89.1	88	47	99.6	96.9	86.2	96.9	99.7	89.6	52.8	68.8	61.5	68.9
CD96	47.3	55.3	58.6	0.109	0.133	0.159	0.149	0.11	0.0661	0.0619	0	0	0.0213	0.773	0.0739	0.534	0.257	0.00449	0.45	0	0.187	0	0.0839	0.109	0.0124	0	0	0.0183	0.335	0.291	0.0586	0.232	0.0118	0.135	0.0451	0.0369	0.0738	0	0	16.3	0.78	15.9	53.4	17.4	11.3	18.6	19.1	32.1	42.6
CD97	34.2	35.7	40.3	40.1	22	46	1.89	0.0563	0.14	0.0935	0	0	0.0374	0.0207	0.0371	0.398	2.05	0.00487	0.946	0	0.207	0	0.0599	0.182	0.00985	0	0.689	14.7	5.85	4.6	0.262	0.877	1.67	27.2	0.632	0.536	0.792	0.349	0.0374	0.88	0.751	1.6	2.82	1.16	2.7	16.5	24.4	47.2	44.6
CD98	89.5	90	92	99.9	99.9	99.9	100	100	99.9	97	85.8	62.5	72.7	99.2	84.1	100	99.9	98.6	99.7	97.4	32.9	•	97.1	92.2	97.5	69	99.8	100	99.4	99.5	99.8	99.5	99.5	99.6	99.9	96.3	99.8	98.4	83.8	97.2	91.9	51.5	98.5	77.1	91.9	96.4	96.8	92.4	98.9
CD99	38	18.6	36.2	1.08	6.33	4.01	0.079	0.144	0.151	0.106	0	0	0.0178	3.17	0.0138	0.535	0.349	0	0.173	0	0.319	1.73	0.481	0.366	2.42	7.74	91.3	64.6	98.6	49	0.0358	96.2	16.2	92.2	0.087	23.9	9.51	32.5	0.0279	0.457	0.564	1.55	8.13	0.492	0.487	2.06	1.75	3.56	9.09
CDH3	11.7	13.8	15.7	0.0629	0.0542	0.131	0.195	1.08	1.78	0.0618	0	0.132	0.0864	0.62	0.0348	0.484	0.0279	0	0.0483	0	0.0553	0	0.156	0.158	0.0226	0	0.0232	0.016	78.8	41	0.0386	73.2	0	92.6	0.0227	0	0.00524	0	0	4.06	0.595	7.52	21.3	0.592	1.84	23.9	16.6	6.96	46.6
CDH6	2.92	6.03	2.53	0.133	0.0753	0.35	0.0856	0.531	0.337	0.358	0	26.1	0.507	12	4.16	0.737	0.195	0.289	1.51	3.14	0.498	0	0.513	1.58	0.0409	0.0625	0.32	0.101	0.06	0.0887	0.738	0.0891	0.7	28.7	1.56	3.13	0.0356	0.499	0.0272	0.232	0.833	0.648	0.646	4.07	0.354	1.87	0.318	0.848	0.681
CDw198	43	29.6	30.6	0.552	0.173	0.402	3.05	61.7	91.1	0.0554	0.174	0.0365	0.282	0.0836	0.0291	28.9	6.47	0.00923	0.0306	0	0.214	0.153	0.227	0.266	0.0318	0.0278	0.0725	0.0436	0.147	0.215	0.0799	0.109	0.235	0.212	0	0.232	0.0214	38.5	4.39	17.1	1.69	27.5	39.1	36.1	16.9	42.5	28.4	67.8	65.1
CDw199	11.6	14.7	20.5	0.108	0.102	0.403	0.0723	0.202	0.193	0.0916	2.01	1.56	0.74	13.6	0.253	0.396	0.85	1.62	2.99	0.21	0.0695	0.225	0	0.145	0.142	0.372	0.166	0.0151	29.3	27.9	0.933	11.7	1.09	20.2	1.46	2.82	0.51	65	0.152	0.253	0.189	1.05	0.554	0.761	0.589	14.6	0.357	5.79	8.11
CDw210	16.6	15.7	30.4	0.145	0.14	0.273	0.446	0.104	0.106	0.0964	0	0	0	0.296	0.054	0.401	0.18	0.0995	0.646	0	0.156	0	0.193	0.236	0.0102	0	0.0347	0.0724	0.264	0.175	0.14	0.11	0.0482	0.137	0.098	0.162	0.019	0.607	0	30.1	0.475	24.6	33	3.52	0.478	18.8	2.17	25.9	21.2
CDw218a	17.3	20.1	28.8	0.288	0.11	0.287	5.05	0.092	0.164	0.0442	0	0.0319	0.1	30.8	0.105	0.476	8.88	0.0223	1.5	0.128	0.149	0	0.283	0.165	0.0331	0	0	0.0338	0.297	7	0.0207	0.838	0	0.113	0.0236	0.0382	0	1.79	0.0358	15.4	12.1	6.53	19.2	78.3	29.9	23.7	11.1	18.6	30.7
CDw329	27.2	29.4	22.7	0.0807	0.048	0.206	0.215	0.0349	0.103	0.111	0	0.167	0	0.163	0.139	0.335	0.0466	0.0324	0.138	0	0.126	0.0281	0.108	0.162	0.0744	0.0542	0.0803	0.0215	0.0619	0.0866	0.0447	0.779	0.0516	0.037	0.0256	0.0841	0.111	0.0338	0	4.89	0.926	2.48	3	2.74	2.74	23.2	18.5	17	30.5
CDw93	37.4	49.2	51.5	0.4	0.0551	0.361	0.164	7.18	31	0.105	0	0.238	0.0365	0.271	0.114	14.3	0.101	0.0172	0.739	0	0.112	0.00983	0.319	0.125	0.0331	0.0872	0.154	0.00878	0.037	0.552	0.25	1.69	0.277	0	0.234	0.384	0.0282	0.128	0	30.4	11.1	9.17	17.3	26.5	20.7	30	6.18	13.3	14.2
CLA	35.2	33.2	26.4	0.822	0.782	1.53	0.0851	9.6	19.7	16.5	0	2.22	1.38	14.9	0.996	99	96.5	0.0107	1.13	0.171	0.615	0.00877	1.33	0.838	21.8	20.1	3.56	1.83	0.25	0.306	11.1	0.294	12.3	0.458	7.55	3.4	1.04	0	0	49.4	62.3	55.3	72.4	19.3	54.2	10.5	7.67	14.5	11.2
CLIP	19.3	25	22.2	0.0309	0.0355	0.0914	0.111	0.0802	0.0782	0.0571	0.118	0.198	0	0.0766	0	0.341	0.121	0.00553	0.0943	0	0.108	0.0114	0.251	0.168	0.104	0.146	0.0214	0	0.024	0.0172	0.0231	0.0142	0.0271	0	0	0	0.0114	0	0	1.53	6.75	2.25	3.3	1.35	1.34	2.05	2.36	9.11	10.6
DCIR	17.6	16.4	16.3	0.0844	0.0832	0.139	0.0319	0.0825	0.0308	0.0207	0	0.113	0.102	1.23	0.0583	0.288	0.421	0.149	0.133	0.25	0.0225	0	0.131	0.41	0.0105	0	0.0558	0.00503	0.0663	0.0319	0.0718	0	0.0865	0.032	0.0286	0.0485	0.00769	0.119	0	0.193	0.336	1.53	0.59	1.16	0.214	2.66	1.62	4.74	15.8
EGF-R	0.332	0.861	4.87	99.5	96.7	99.7	33.2	7.92	3.9	11.8	0	1.95	0.0775	63.8	44.4	100	97.6	0.279	4.84	7.83	1.53	42.9	0.294	0.409	0.577	2.62	10.9	97.9	96.7	96.4	56.4	96.8	73.8	97.9	21.3	52.5	0.491	17	0.114	37.9	59.3	47	90.8	86.4	31.3	2.91	1.55	0.727	7.35
FMC7	0.11	1.42	4.74	0.0424	0.0262	0.185	0.113	0.0968	0.113	0.0231	0	0.217	0.0757	0.0219	0.0078	0.332	0	0.00541	0.0454	0.0607	0.0277	0.00851	0.916	0.132	0.0372	0.0324	0.0562	0.0102	0.0133	0	0.0231	0.0156	0.0678	0.0395	0	0.0899	0.00603	0.0392	0	0.843	0	0	2.47	0.445	0.82	0.771	0.693	0.92	0.9
fMLP-R	24.4	15.4	33.1	0.0515	0.0543	0.18	0.134	0.136	0.142	0.035	0	0.0316	0	0.159	0.0135	0.42	0.207	0.00908	0.11	0	0.0805	0	0.191	0.183	0.0103	0.0224	0.0322	0.0047	1.81	2.32	0.0391	1.83	0	0.894	0	0	0.0146	0	0	2.21	0.473	4.89	34.8	2.36	0.921	11.6	2.91	5.72	31.2
HLA-A2	5.42	2.5	9.45	24.3	26.3	99.7	4.56	1.28	2.65	0.325	0	0.435	0.192	14	99.4	0.582	0.214	0.0664	7.59	0.083	0.354	3.67	0.405	0.6	0	0	0.595	1.06	100	79.5	7.4	100	99.9	99.8	4.91	27.6	99.1	42.6	96.7	98.2	13	99	13.4	99.7	93.1	96.3	2.84	100	11.9
HLA-ABC	100	99.9	100	100	99.8	99.8	66.2	21.7	19.2	79.8	67.2	96	91.4	98.9	96.6	100	100	93.8	99.8	97.7	97	99.9	94.1	46.8	85.5	99.6	3.75	100	100	100	100	100	100	99.9	99	96.9	99.8	93.6	94.8	98.8	99.2	98.7	99.6	100	93.4	97	99.2	100	99.7
HLA-DM	8.05	5.9	11.1	100	99.9	21.4	15.5	1.76	8.04	0.978	0.253	1.34	0.712	4.32	0.534	0.652	1.99	0.458	4.68	95.3	0.326	0	0	0.0558	0.0672	0.104	100	0.199	8.16	12.6	0.687	8.53	0.927	5.57	0.0888	1.49	0.398	0.213	0	5.15	12.2	2.58	2.36	12.8	5.08	38.6	27.7	16.1	31.2
HLA-DR	19.9	20	28	0.655	0.579	3.09	0.0718	0.0406	0.0444	0.0543	0	0.0412	0	0.0206	0	0.369	0.0852	0.0128	0.0246	0	0.173	0	0	0.0683	0.0165	0	0	0	0.115	0.114	0.0218	0.0401	0	0.101	0	0	0	0	0	2.65	22.4	3.62	2.57	13.2	5.56	63.3	37.6	41.6	60.2
HPC	1.05	2.15	4.63	18.7	6.84	71.4	73.2	18.3	25.1	0.0221	0.173	0.114	0	0.102	0.0106	0.487	0	0.00616	9.36	0	0.263	16	0.175	0.224	18.8	70.5	51.4	7.61	99.9	98.1	4.42	99.6	4.29	99.8	16.9	10.1	9.63	2.23	0.163	1.31	2.07	1.31	4.77	7.01	8.04	3.48	2.3	3.27	6.59
ITGB7	45.1	42.1	61.2	0.0579	0.0379	0.13	0.0651	0.141	0.0657	0.0271	0	0	0.02	0.0945	0	0.231	0.0928	0.00444	0.0189	0	0.189	0	0.264	0.131	0.0213	0	0.00773	0	0.0733	0.107	0	0.0949	0	0.113	0	0	0	0.0464	0.0307	0.928	0.584	2.45	7.85	0.658	0.676	30.3	13.3	24.9	32.5
LTBR	31.3	30.4	28.9	99.8	99	97.6	100	99.9	99.9	99	31.8	83.7	74.6	86.1	89	100	99.7	9.75	100	32.4	1.2	71.5	2.19	10.3	35.9	94.5	89	99.3	100	99.9	96.6	99.9	98.8	99.8	79.1	95.4	96.3	79	5	32.2	72.9	28.4	13.6	56.9	35.5	12.3	13.1	14	15
MIC A/B	14.7	11.7	22.7	52.8	54.9	70.7	0.0978	7.13	23.6	27.6	0.106	4.79	8.66	2.27	2.64	0.436	15.6	0.0209	1.08	0.136	0.23	0.143	0.344	17.4	0.474	0.118	0.355	25	60.4	18.4	0.0664	38.6	2.35	52.5	0.143	6.15	0.103	0.0908	0.0266	3.44	0.637	4.68	8.31	9.69	3.54	4.87	2.51	4.44	5.35
PAC-1	16.2	19.9	56.2	0.0807	0.0756	0.244	0.0751	0.0848	0.0551	0.0482	0	0.274	0.0248	0	0.00669	0.18	0	0.0184	0	0	0.143	0	0.855	0.313	0.0291	0	0.0284	0.0238	0.0113	0.0164	0.0414	0.0503	0.0391	0	0	0.0386	0	0	0	0.872	6.67	0	1.27	0.595	0.681	0.62	0	0.396	0
Podoplanin	20.7	15.1	21	0.228	0.28	0.422	0.0897	0.198	0.257	0.0367	5.76	6.78	6.26	3.96	0.014	0.426	0.266	0.779	0.201	9.28	97.9	98.6	99.4	3.82	95.3	85.1	93	99	99.9	99.8	99	99.9	81.3	73.6	76.9	95	98	88.8	40.6	4.99	2.22	5.41	15.5	1.27	2.07	23.6	12.5	10.2	52.6
SSEA-3	17.2	6.08	27.7	0.0899	0.137	0.853	1.73	15.4	19.1	0.776	5.41	38.1	30.8	87	16.2	91.4	97.2	11	43.8	9.58	0.129	0	0.662	0.506	0.0252	0.492	0.279	0.197	1.53	4.92	0.249	5.05	1.08	10.7	0.486	0.21	1	0	0.185	89.7	47.1	20.5	50.4	65.6	87.8	51.3	4.59	7.93	14.7
SSEA-4	8.15	0.225	2.7	21.8	17.4	60.1	0.32	7.84	9.91	0.735	5.56	29.2	46.2	85.9	22.1	95.9	99.9	19.4	94.2	10.2	0.0368	0	0.0711	0.277	0.0368	0.371	30	10.2	3.42	24.6	3.43	25.7	33.8	62.7	0.767	4.62	1.44	10	0.0303	79.2	50.5	25.4	72.8	41.3	89.6	66.3	2.46	1.36	3.86
Stro-1	14.7	20.9	31.9			0.444	0.158	0.146	0.281	0.0439	0.521	1.08	0.525	7.58	0.0793	0.772	0.834	0.252	0.41		0.19	0.155	0.196	0.594	0.127	0.0653		0.0583	0.397	0.366	0.299	0.164	0.49	1.62	0.594	1.33	0.14	2.08	0.671	0.455	0.898	0.588	0.418	6.68	0.326	2.19	0.779	5.31	2.28
TCR alpha beta	19.4	22.9	31.1	0.057	0.046	0.173	0.12	1.64	2.23	0.0544	0	0.113	0.0533	0.325	0.0288	4.07	1.71	0.0489	0.0975	0.0951	0.108	0	0.161	0.125	0	0	0.0417	0.0125	0.0582	0	0	0.0927	0.0263	0.148	0.0246	0	0.00504	0	0.0359	1.28	2.27	1.95	3.8	0.835	3.24	28.6	24.8	28.6	20.8
TCR gamma delta	33.2	3.84	20.5	0.298	0.386	0.533	6.41	0.736	1.02	0.0979	0	0.199	0.129	1.09	0.0861	11.1	3.18	0.208	0.973	0.35	0.181	0.0385	0.343	0.0964	0.106	0.283	0.244	0.293	0.46	0.959	0.793	0.824	0.53	1.99	0.763	0.248	0.0414	59.6	0	1.65	9.78	33.7	12.9	0.872	2.85	2.44	7.95	28.7	12
TPBG	0.356	1.58	1.34	0.113	0.181	0.325	0.106	0.0618	0.178	0.0828	0.243	0.299	0	0.598	0.105	0.252	0.408	0.162	1.05	0.173	0.141	1.48	0	0.262	0	0.0288	0.841	0.076	0.105	0.135	0.56	0.0394	1.03	0.263	0.567	0.85	0.0962	2.34	0.11	0.317	0	0	0.817	0.93	0.314	1.69	0.181	2.46	3.07
VB8 TCR	25	3.34	11.8	1.45	1.32	2.93	9.99	0.619	0.729	0.699	0.152	0.766	0.51	2.76	0.741	8.2	7.18	1.17	3.71	0.534	0.392	0.41	0.775	0.899	0.98	0.463	2.12	1.45	1.21	0.77	0.759	0.601	0.378	0.641	0.518	0.463	0.549	8.22	0.23	3.44	6.98	38.4	5.57	1.75	2.8	3.86	6.23	30	6.1
VD2 TCR	38.1	40.8	38	1.88	2.22	9.08	8.81	2.66	2.57	2.27	3	4.35	4.74	2.1	2.49	2.65	0.309	7.81	4.64	3.04	3.21	1.65	2.95	2.46	1.61	1.48	5.32	6.62	1.22	1.45	3.45	1.05	3.79	1.55	4.59	4.01	1.82	2.14	0.546	24.2	6.67	17	3.06	42	29.7	16.9	5.79	16.6	5.57
[truncated: 2 more columns]
